# Supplementary material for: Design, synthesis and biological evaluation of optically pure functionalized spiro[5,5]undecane-1,5,9-triones as HIV-1 inhibitors
Source: Royal Society of Chemistry journal article supplement (doi:10.1039/c1ob06133j), 2011-01-01

## ***Supporting Information-II***

### **Design, Synthesis and Biological Evaluation of Optically Pure Functionalized Spiro[5,5]undecane-1,5,9-triones as HIV-1 Inhibitors**

**Dhevalapally B. Ramachary,<sup>\*,‡</sup> Y. Vijayendar Reddy,<sup>‡</sup> Atoshi Banerjee,<sup>‡</sup> and Sharmistha Banerjee<sup>\*,‡</sup>**

<sup>‡</sup>School of Chemistry, University of Hyderabad, Central University (P.O.), Hyderabad-500 046, India, Email: [ramsc@uohyd.ernet.in](mailto:ramsc@uohyd.ernet.in)

<sup>\*</sup>School of Life Sciences, Department of Biochemistry, University of Hyderabad, Central University (P.O.), Hyderabad-500 046, India.

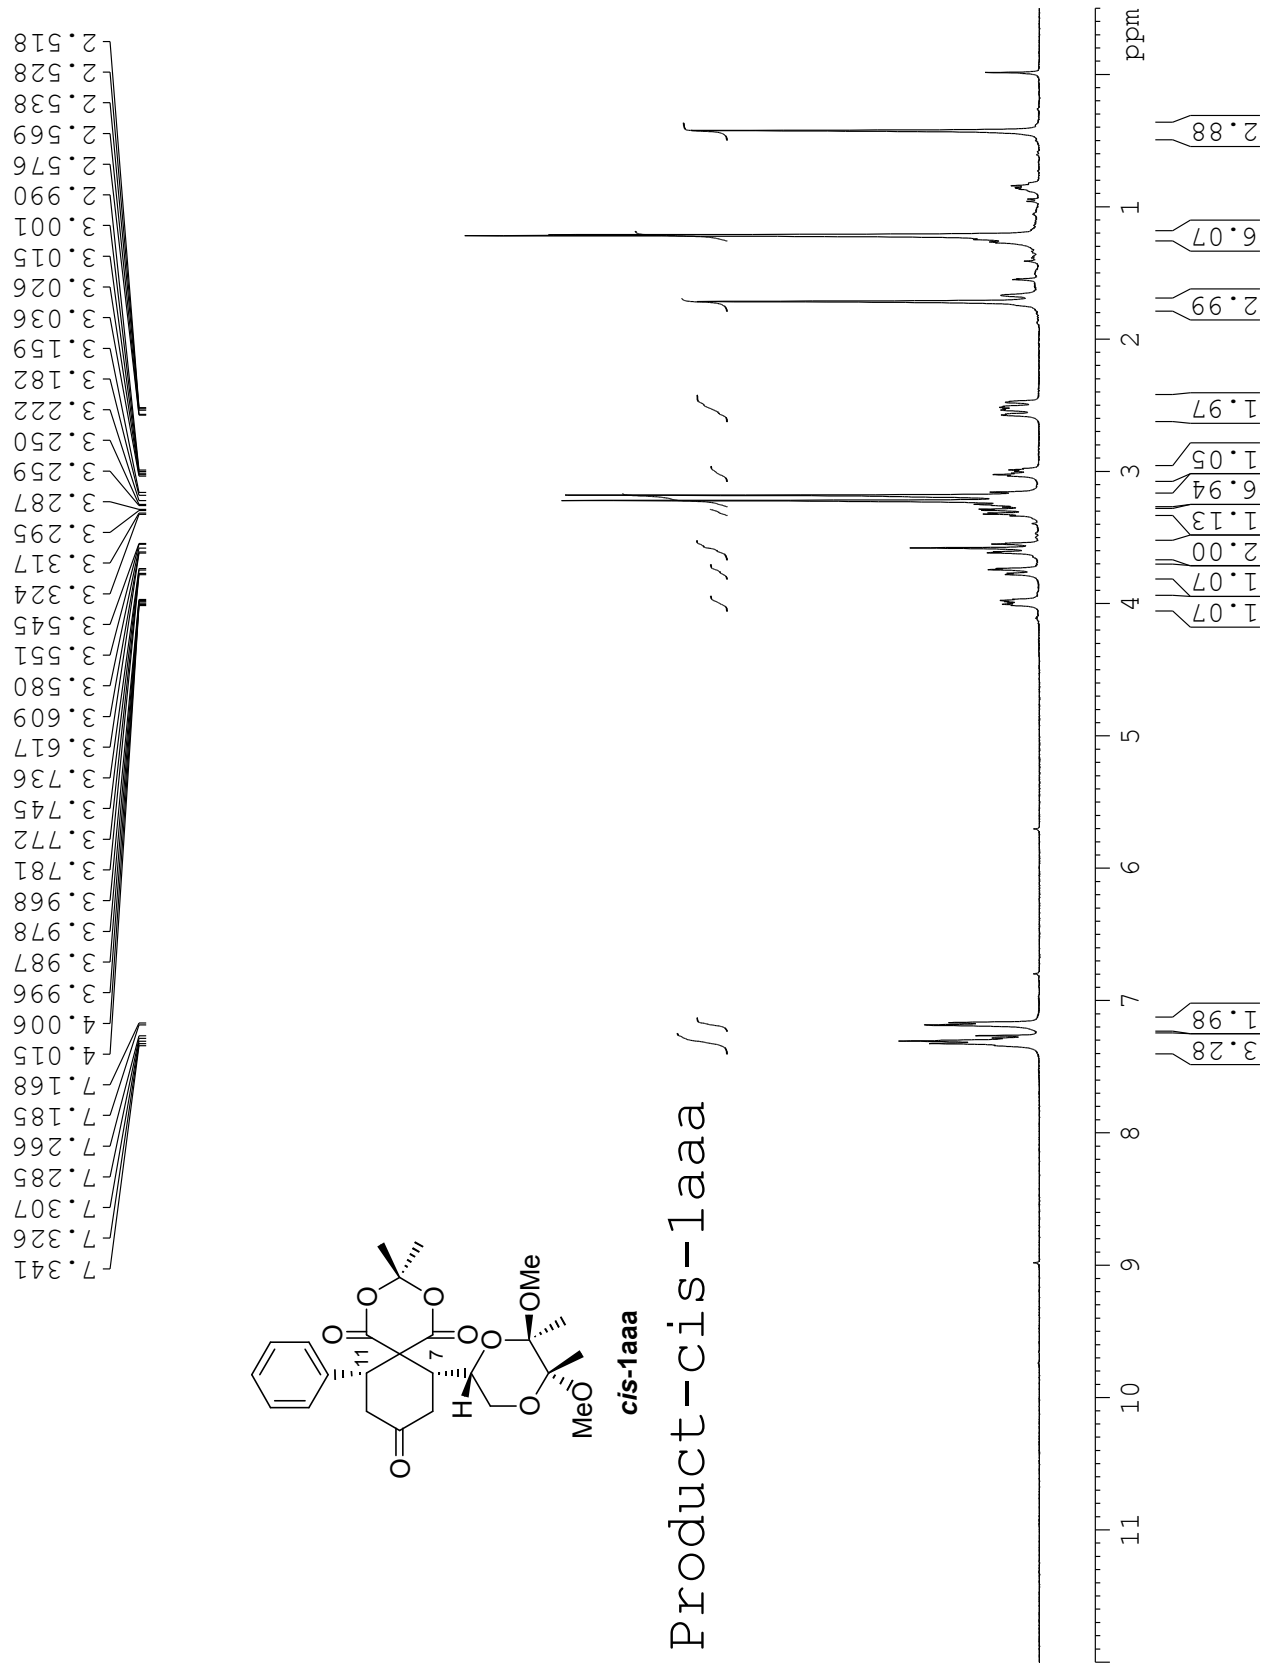

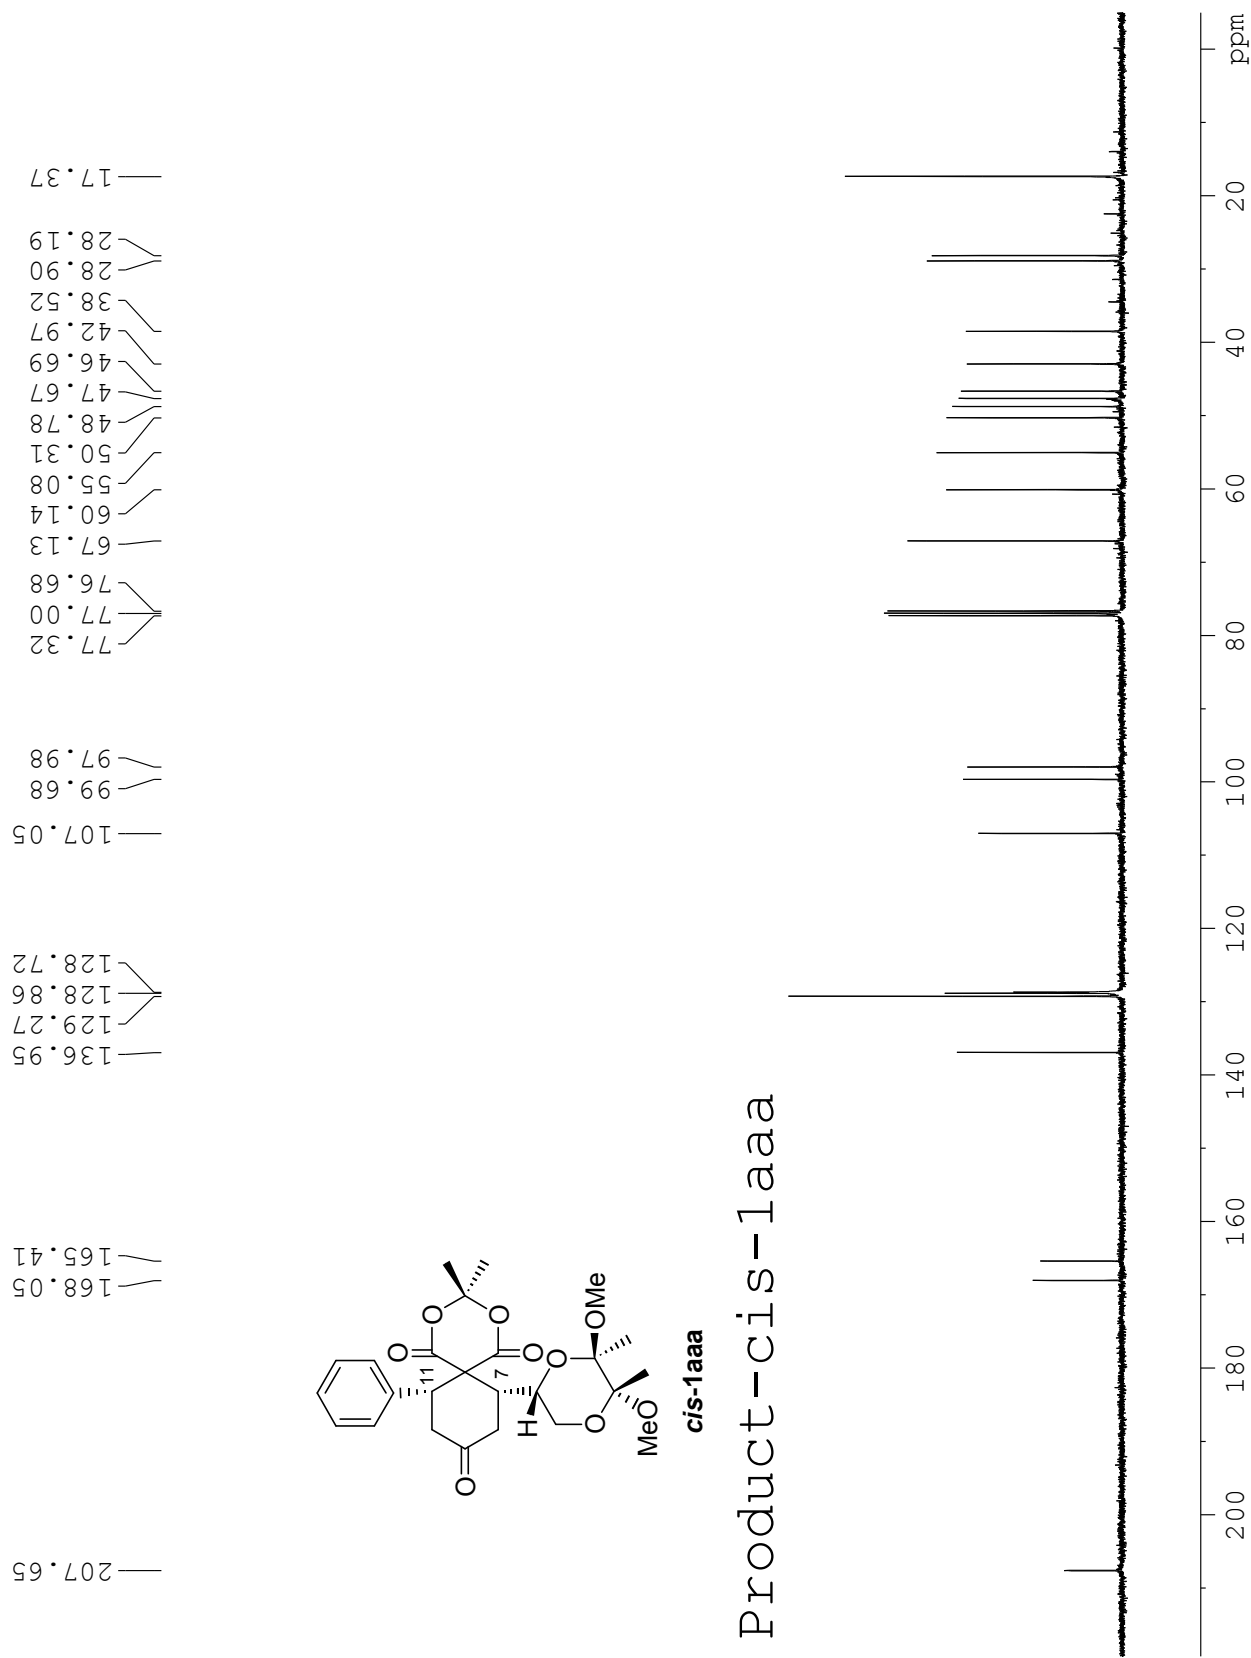

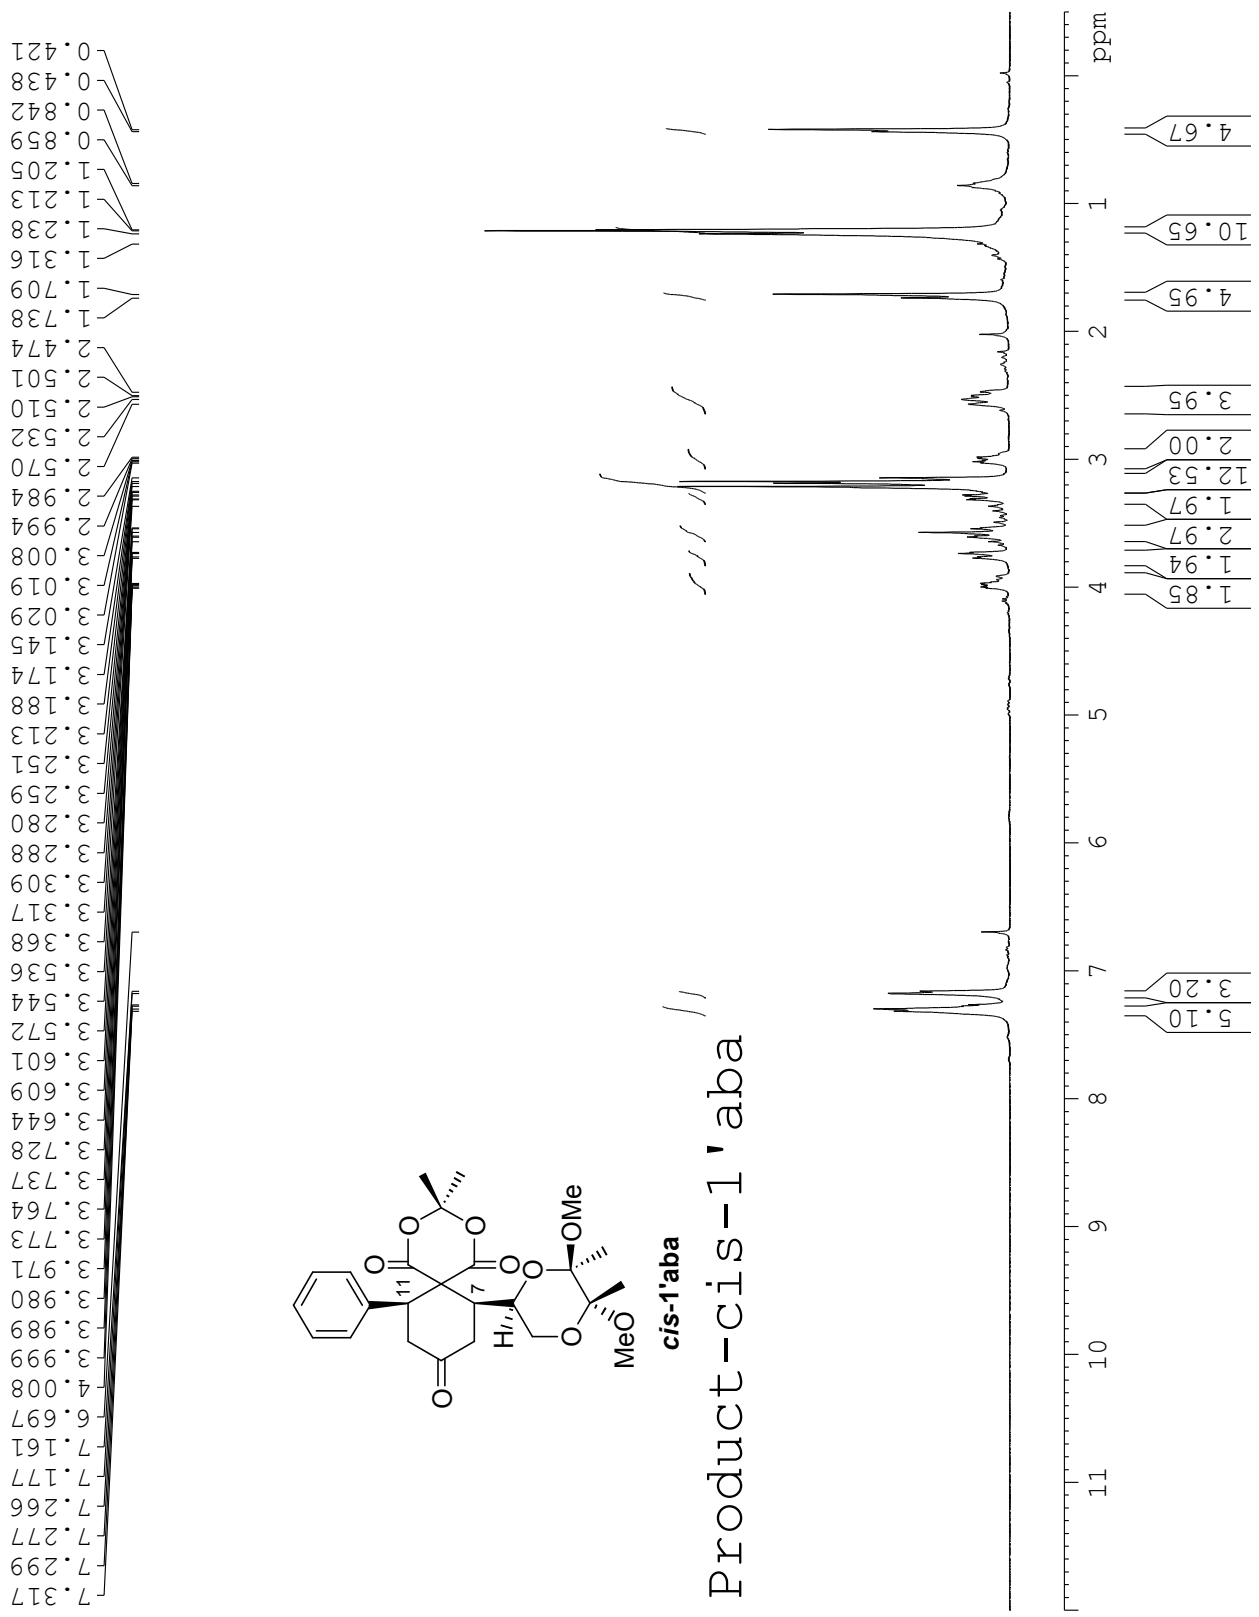

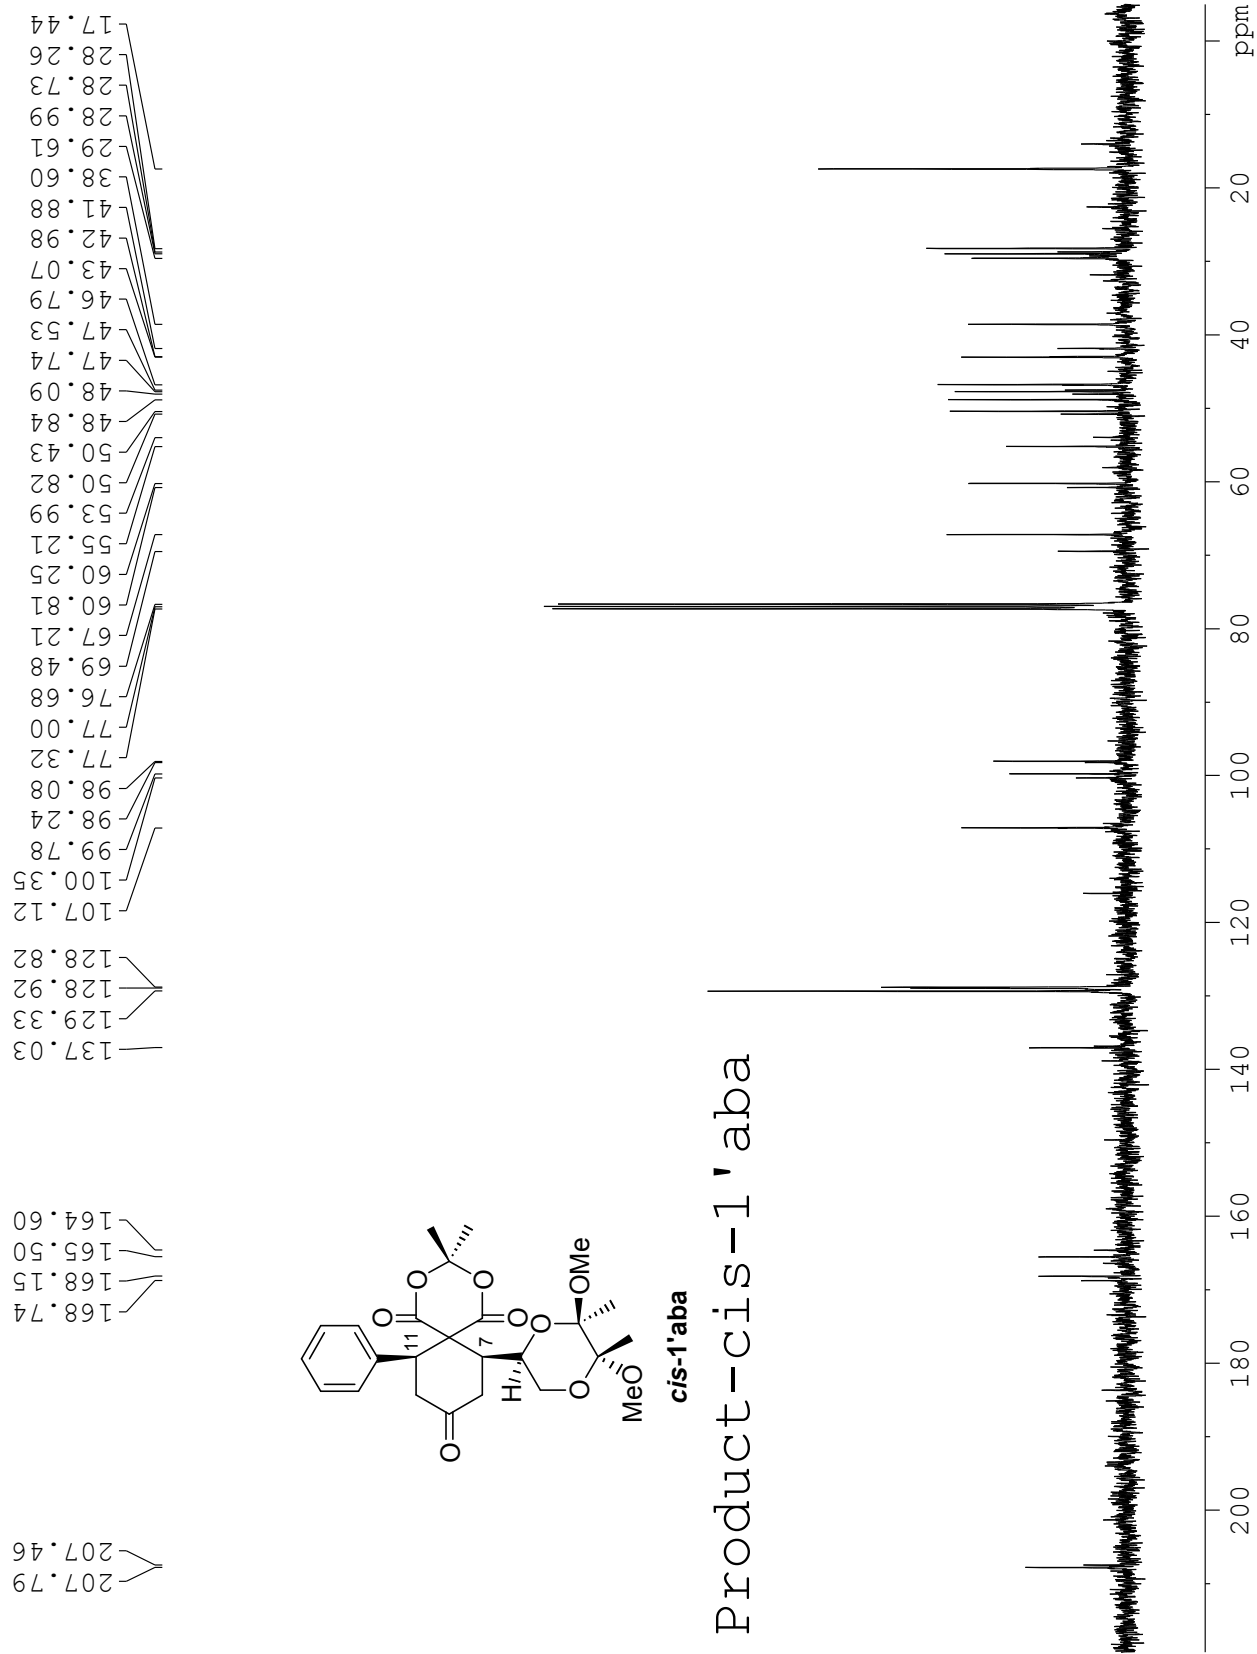

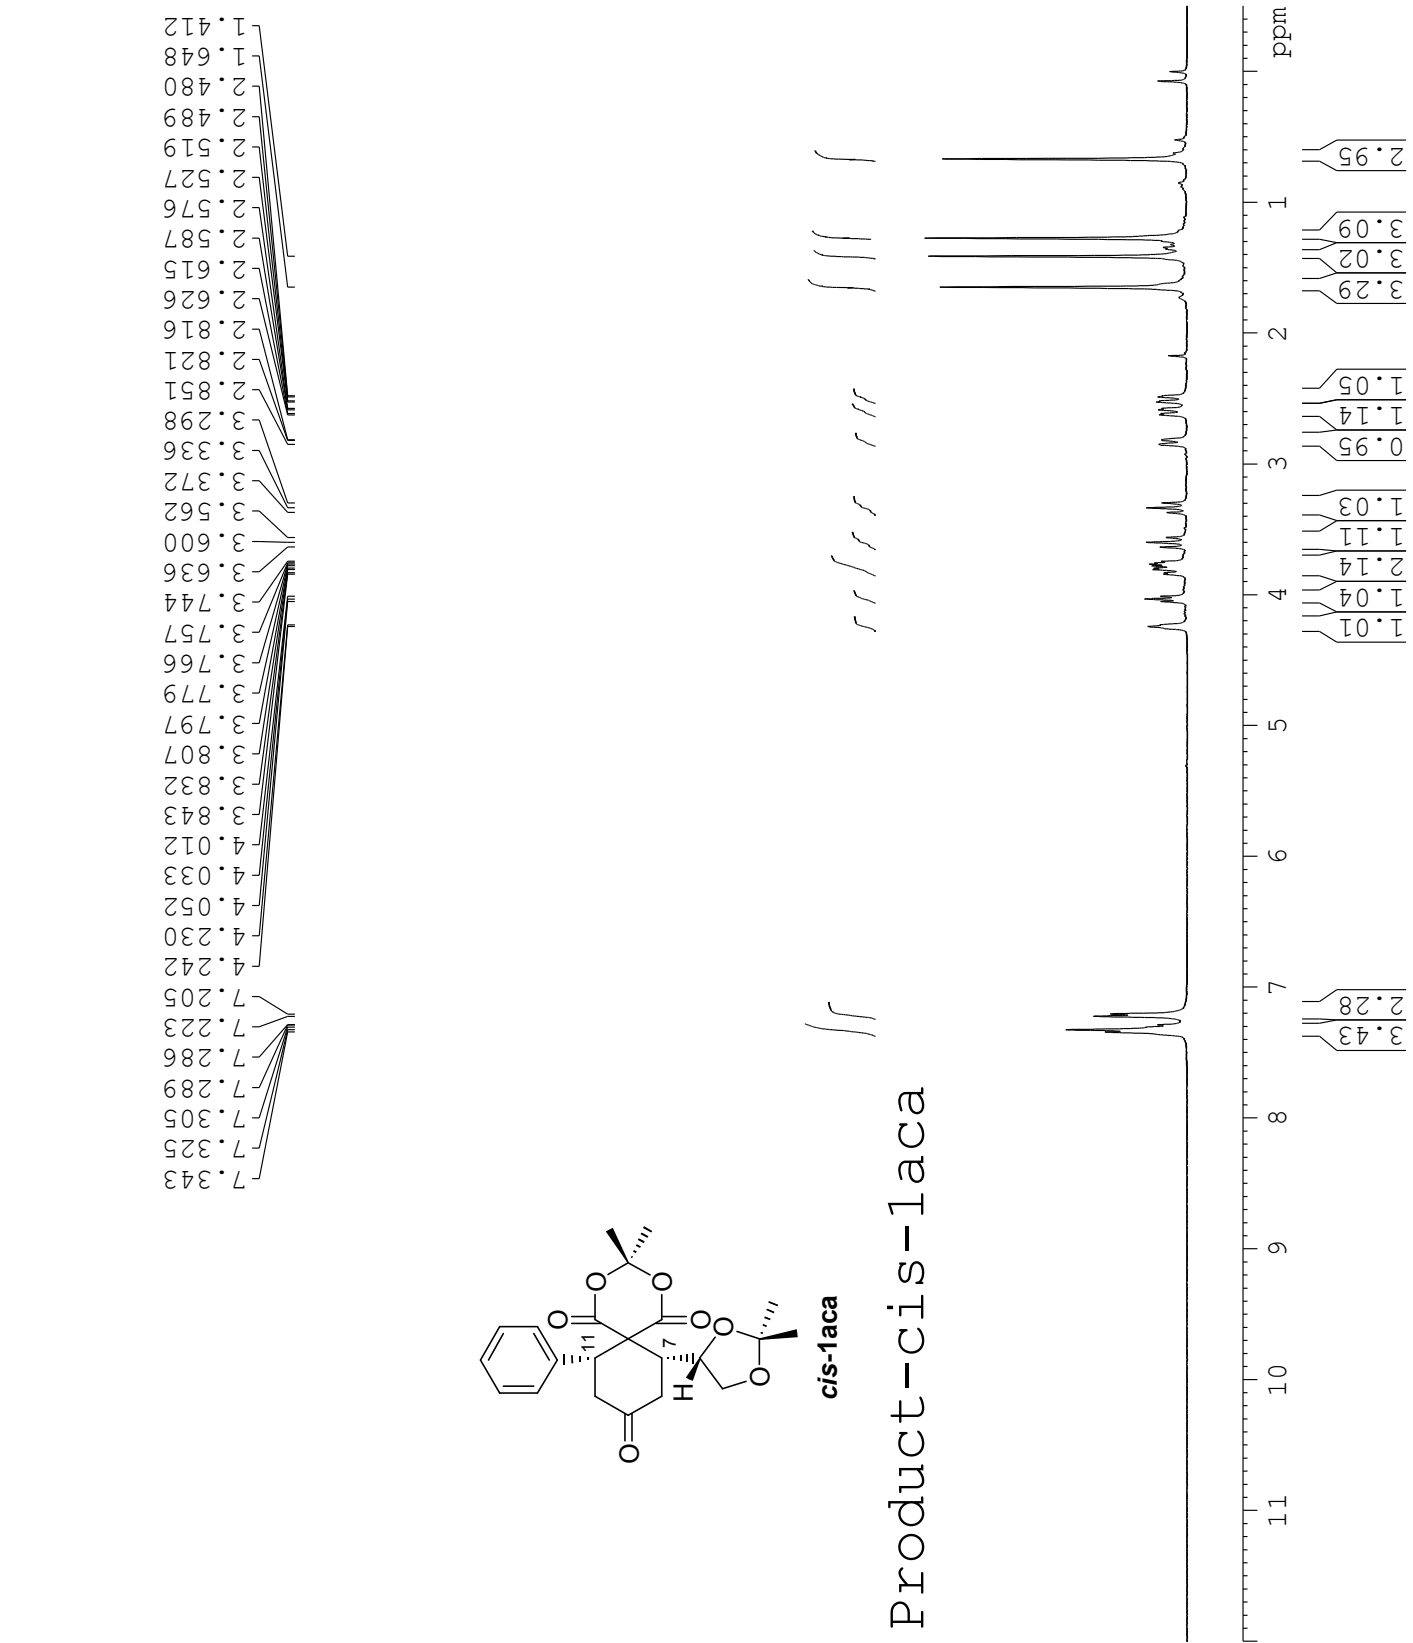

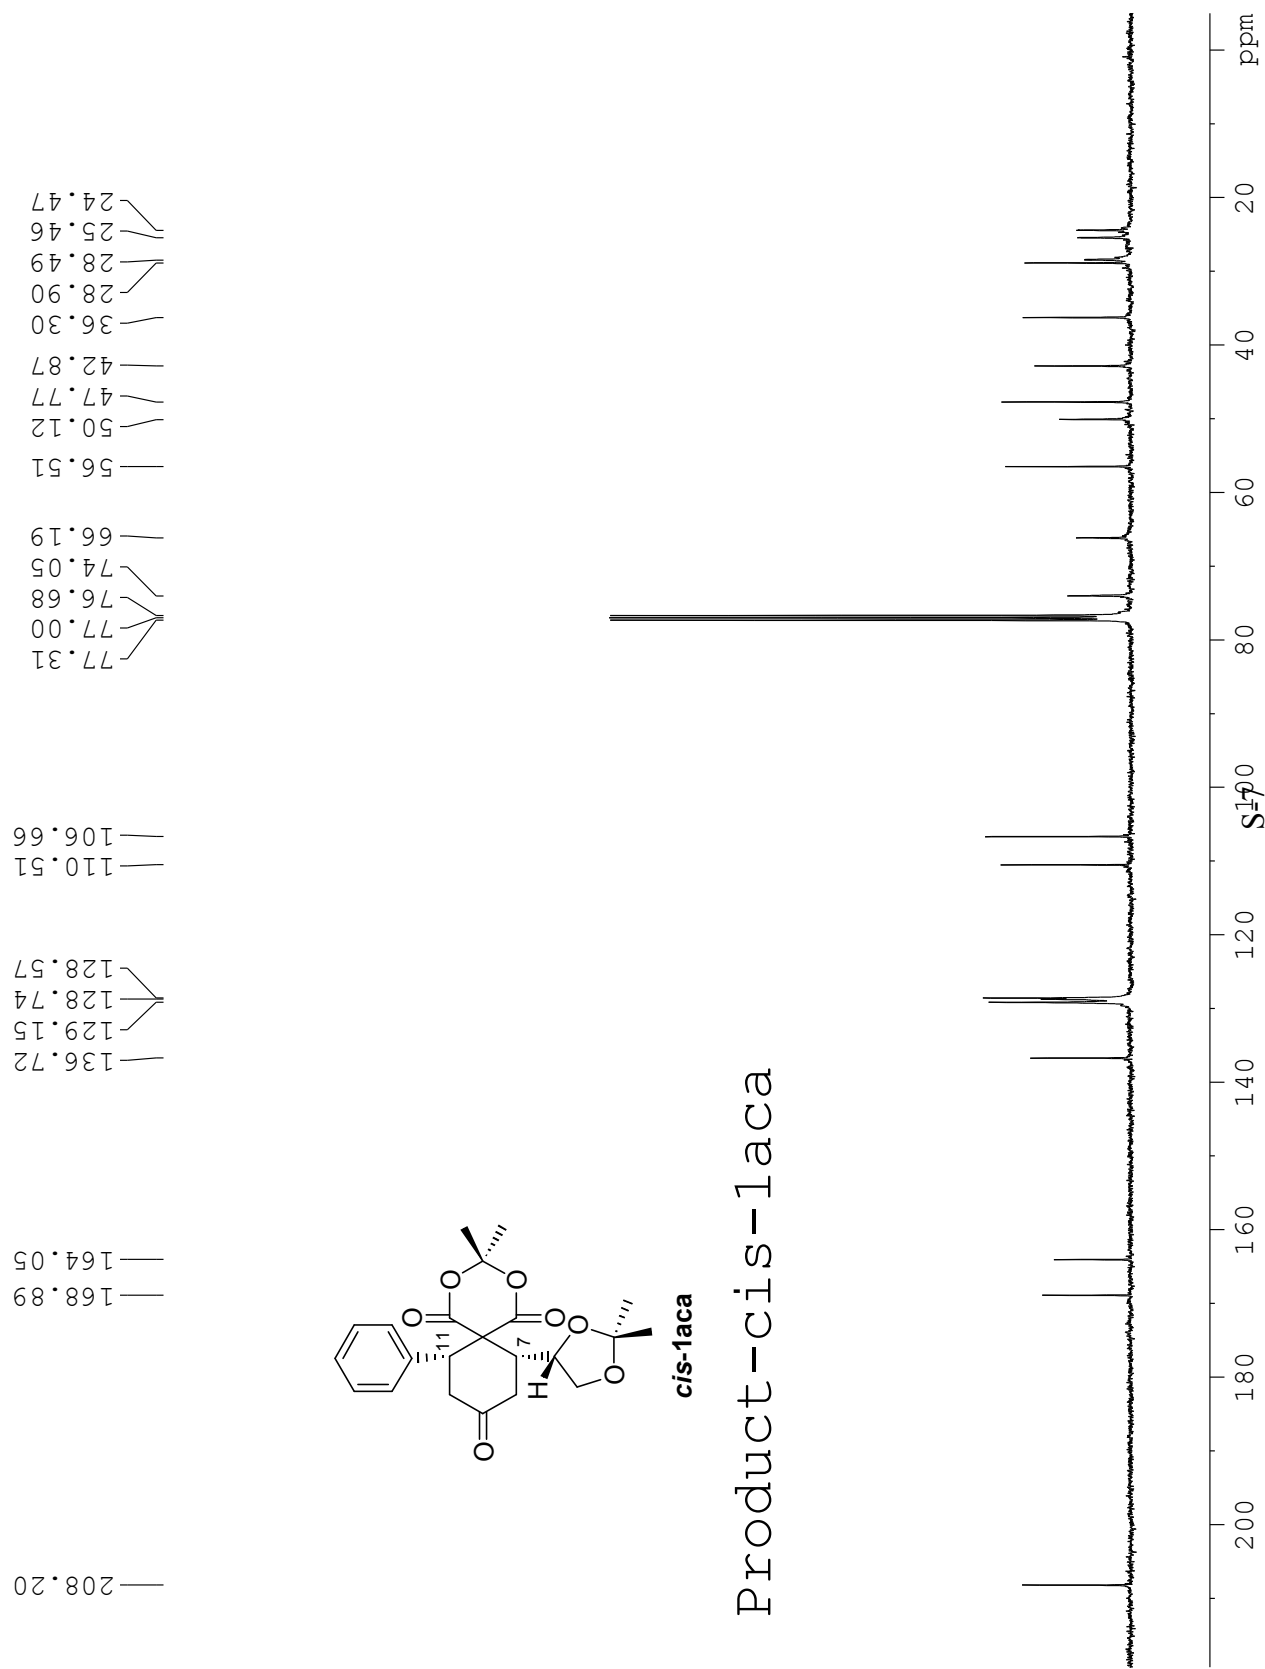

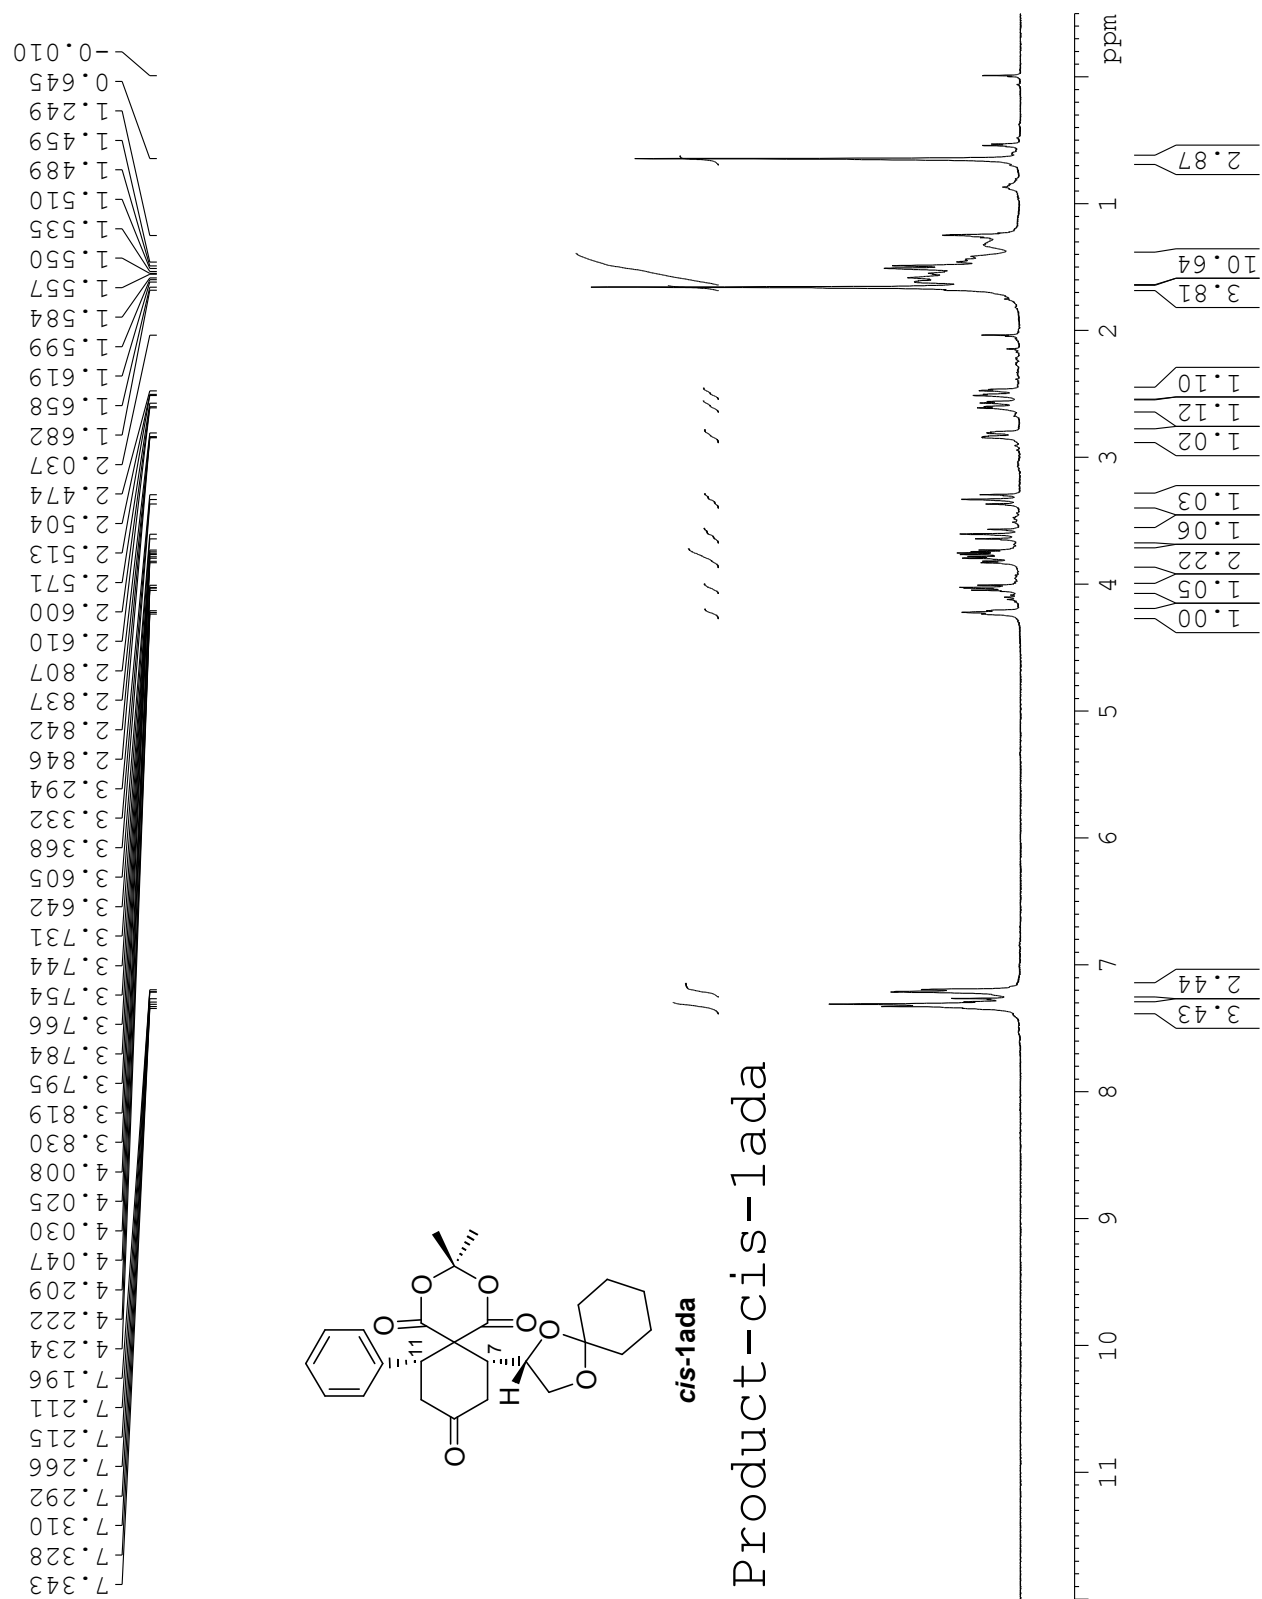



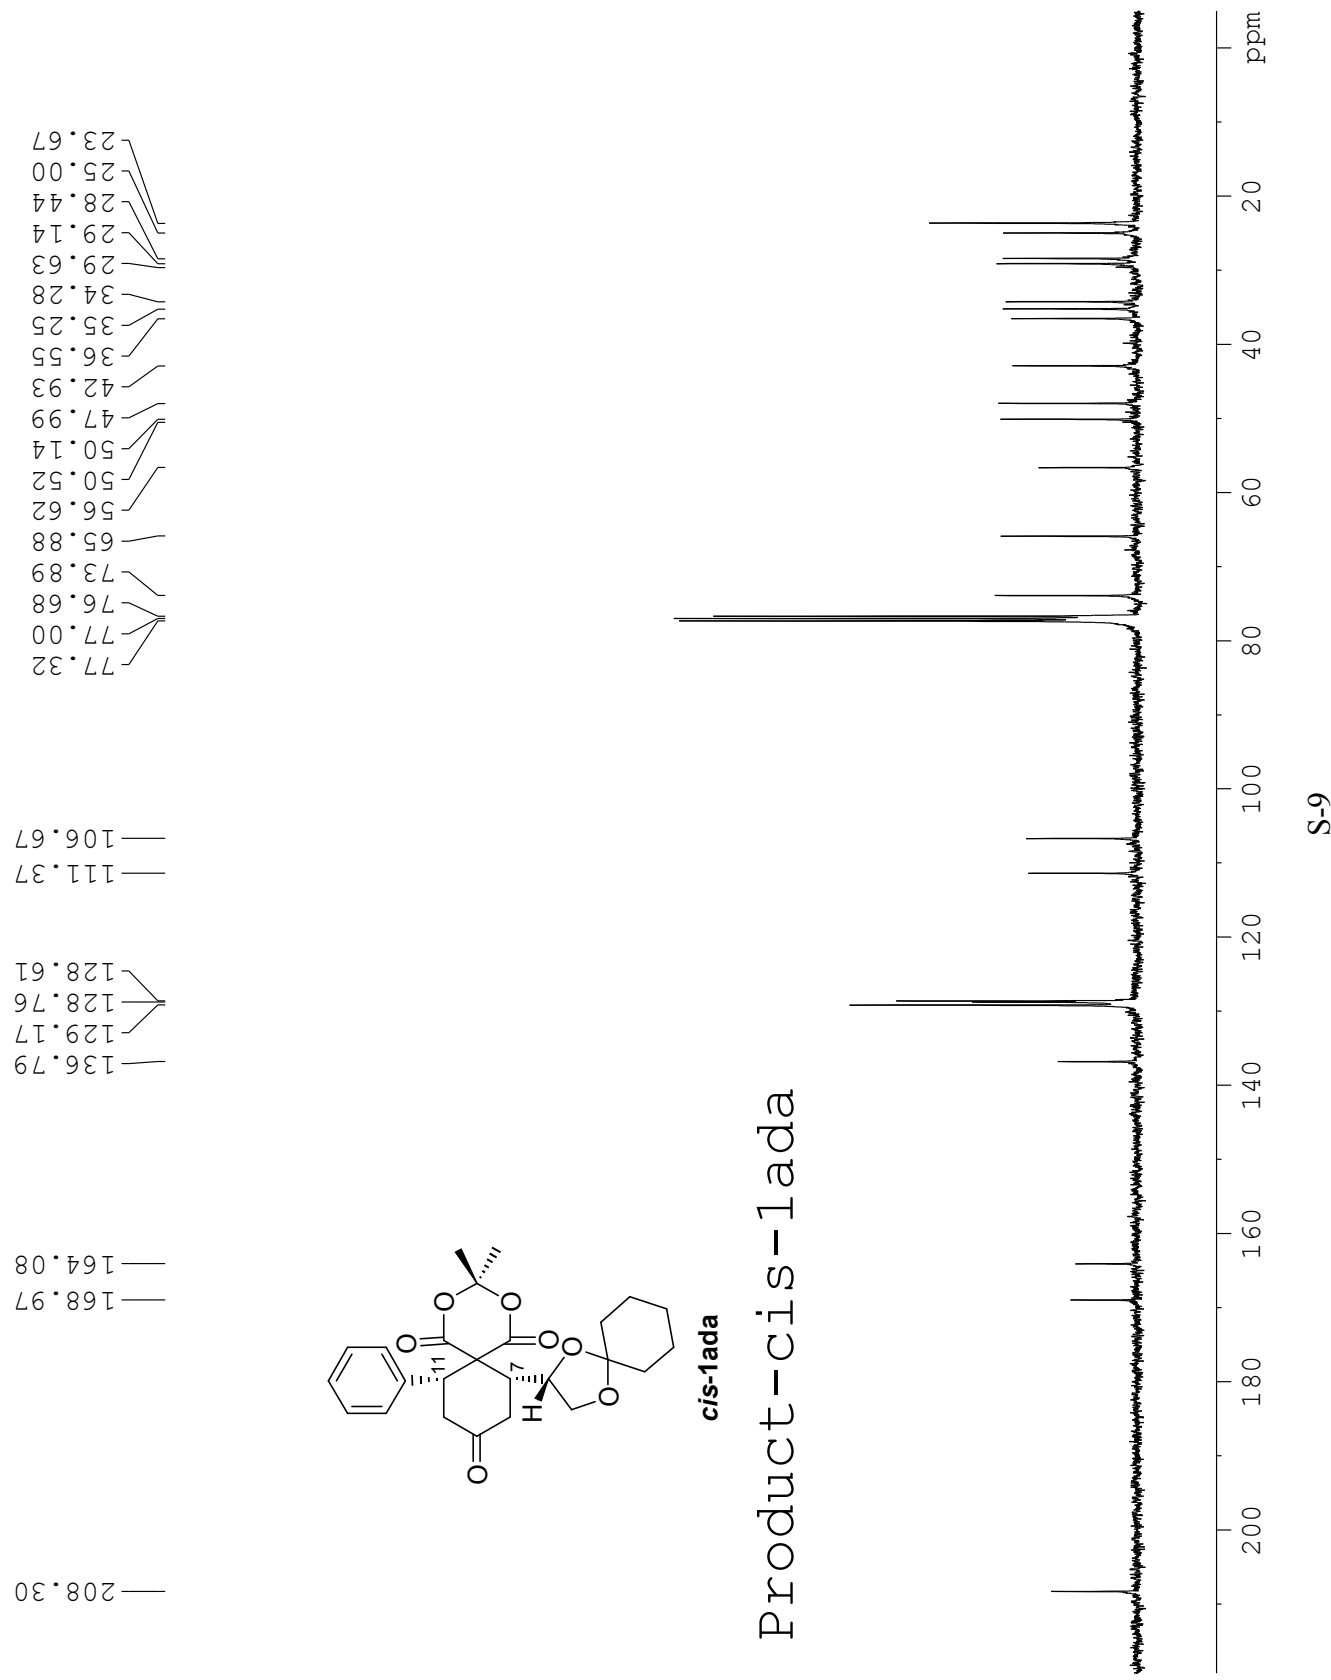

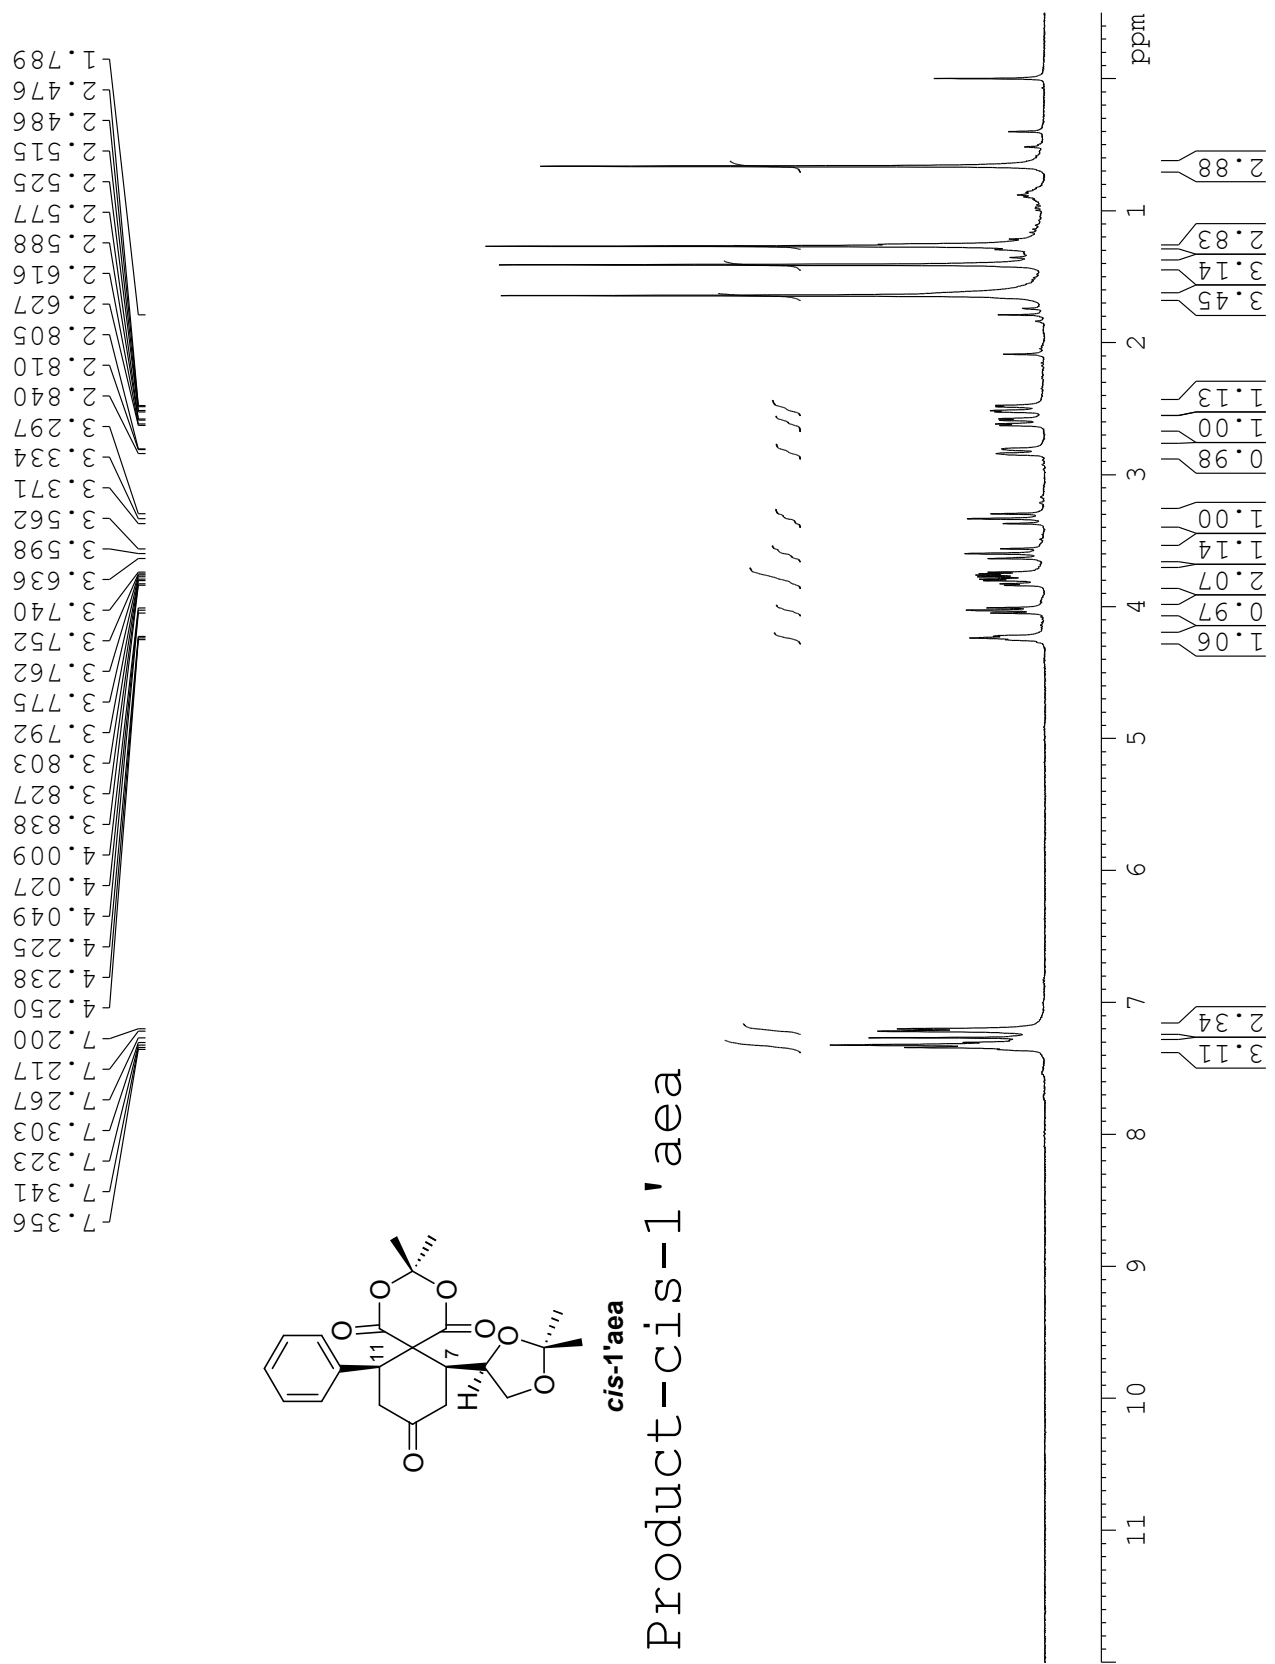

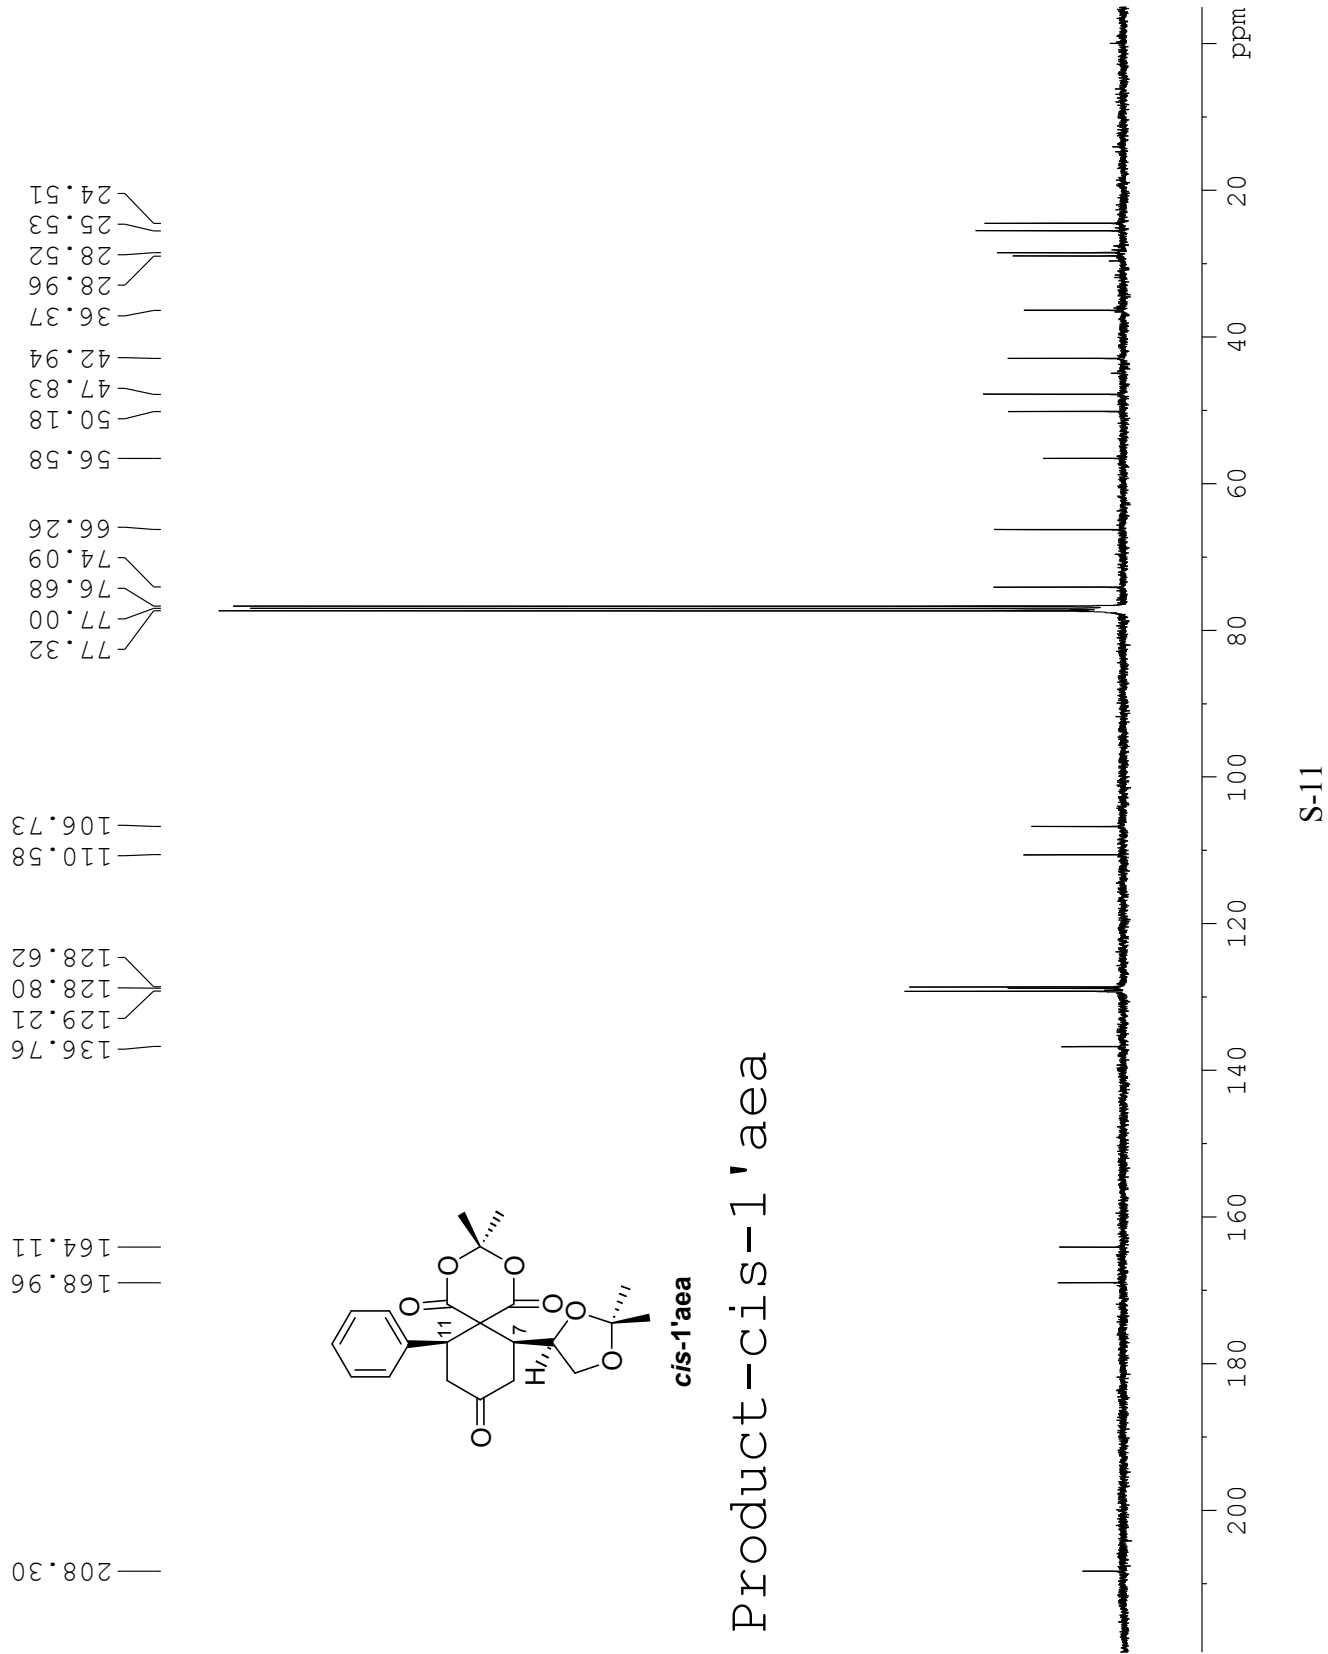

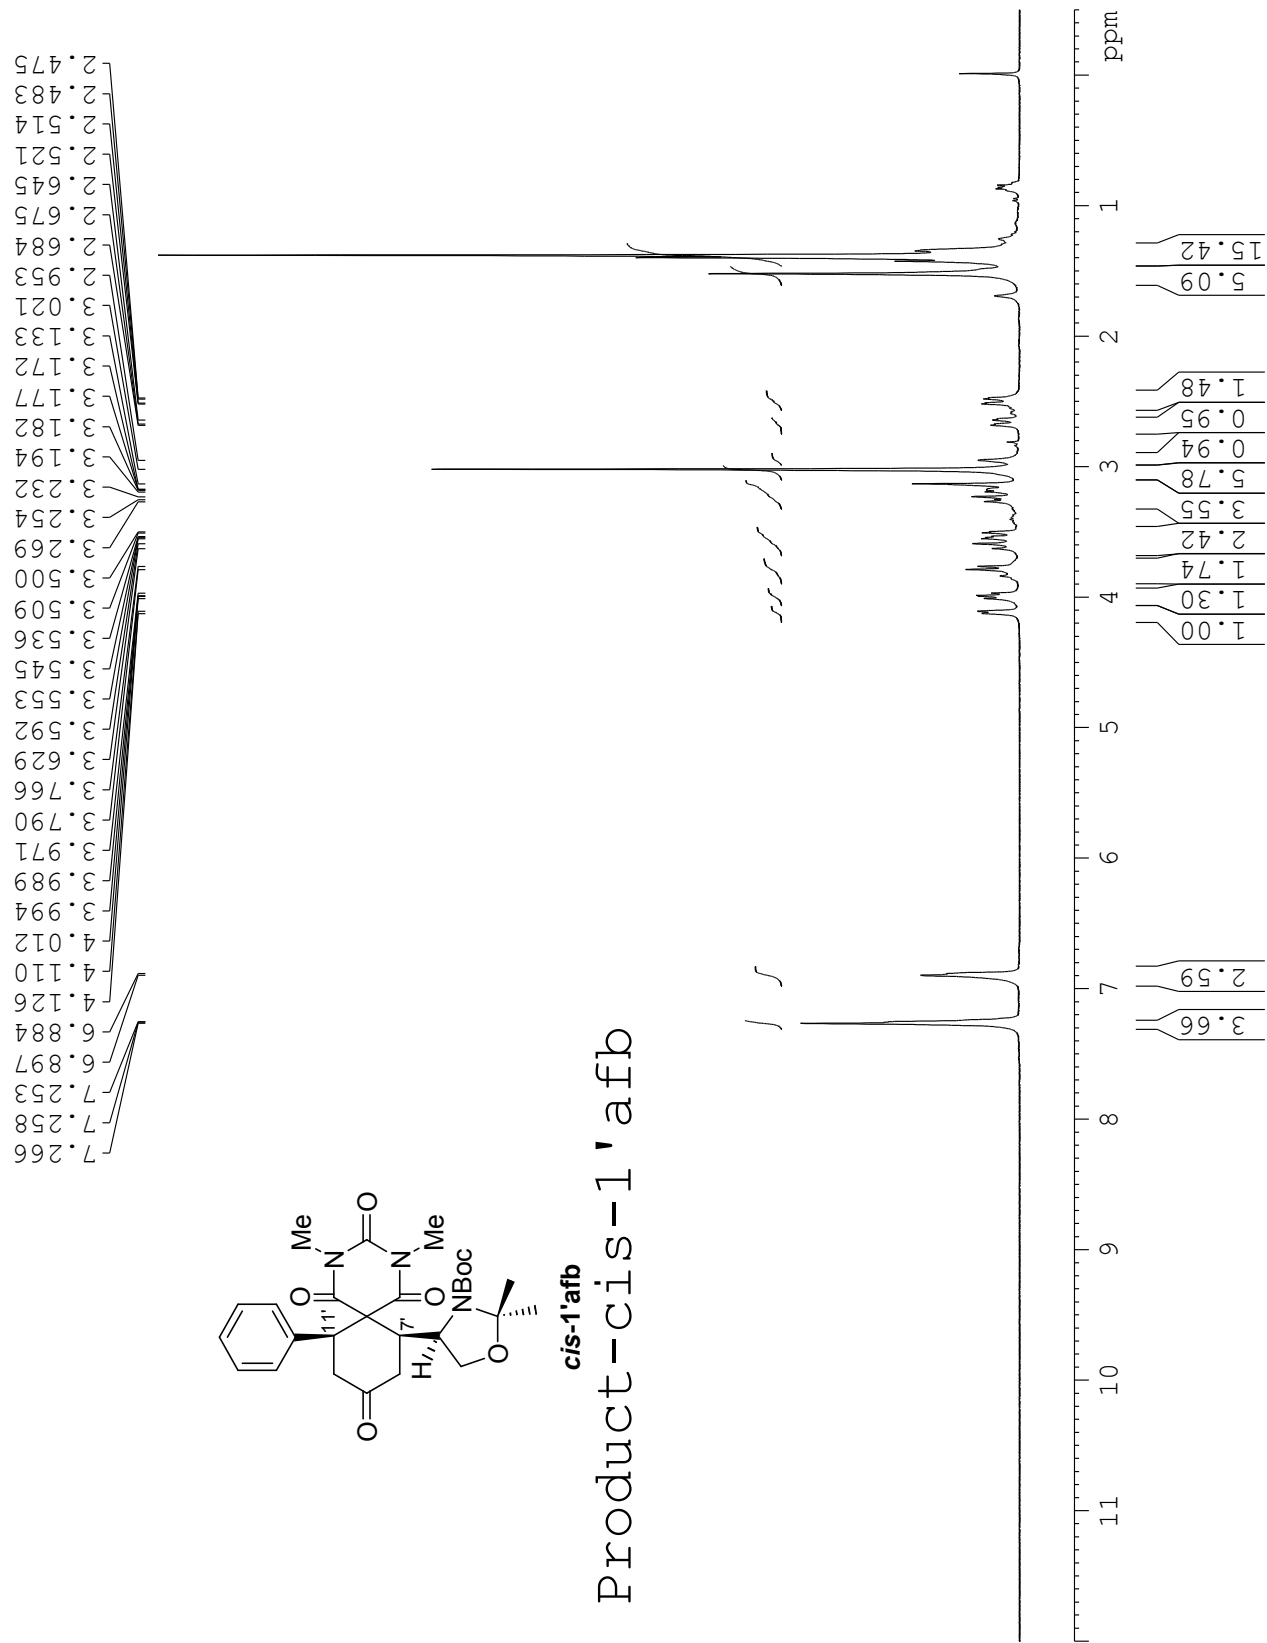

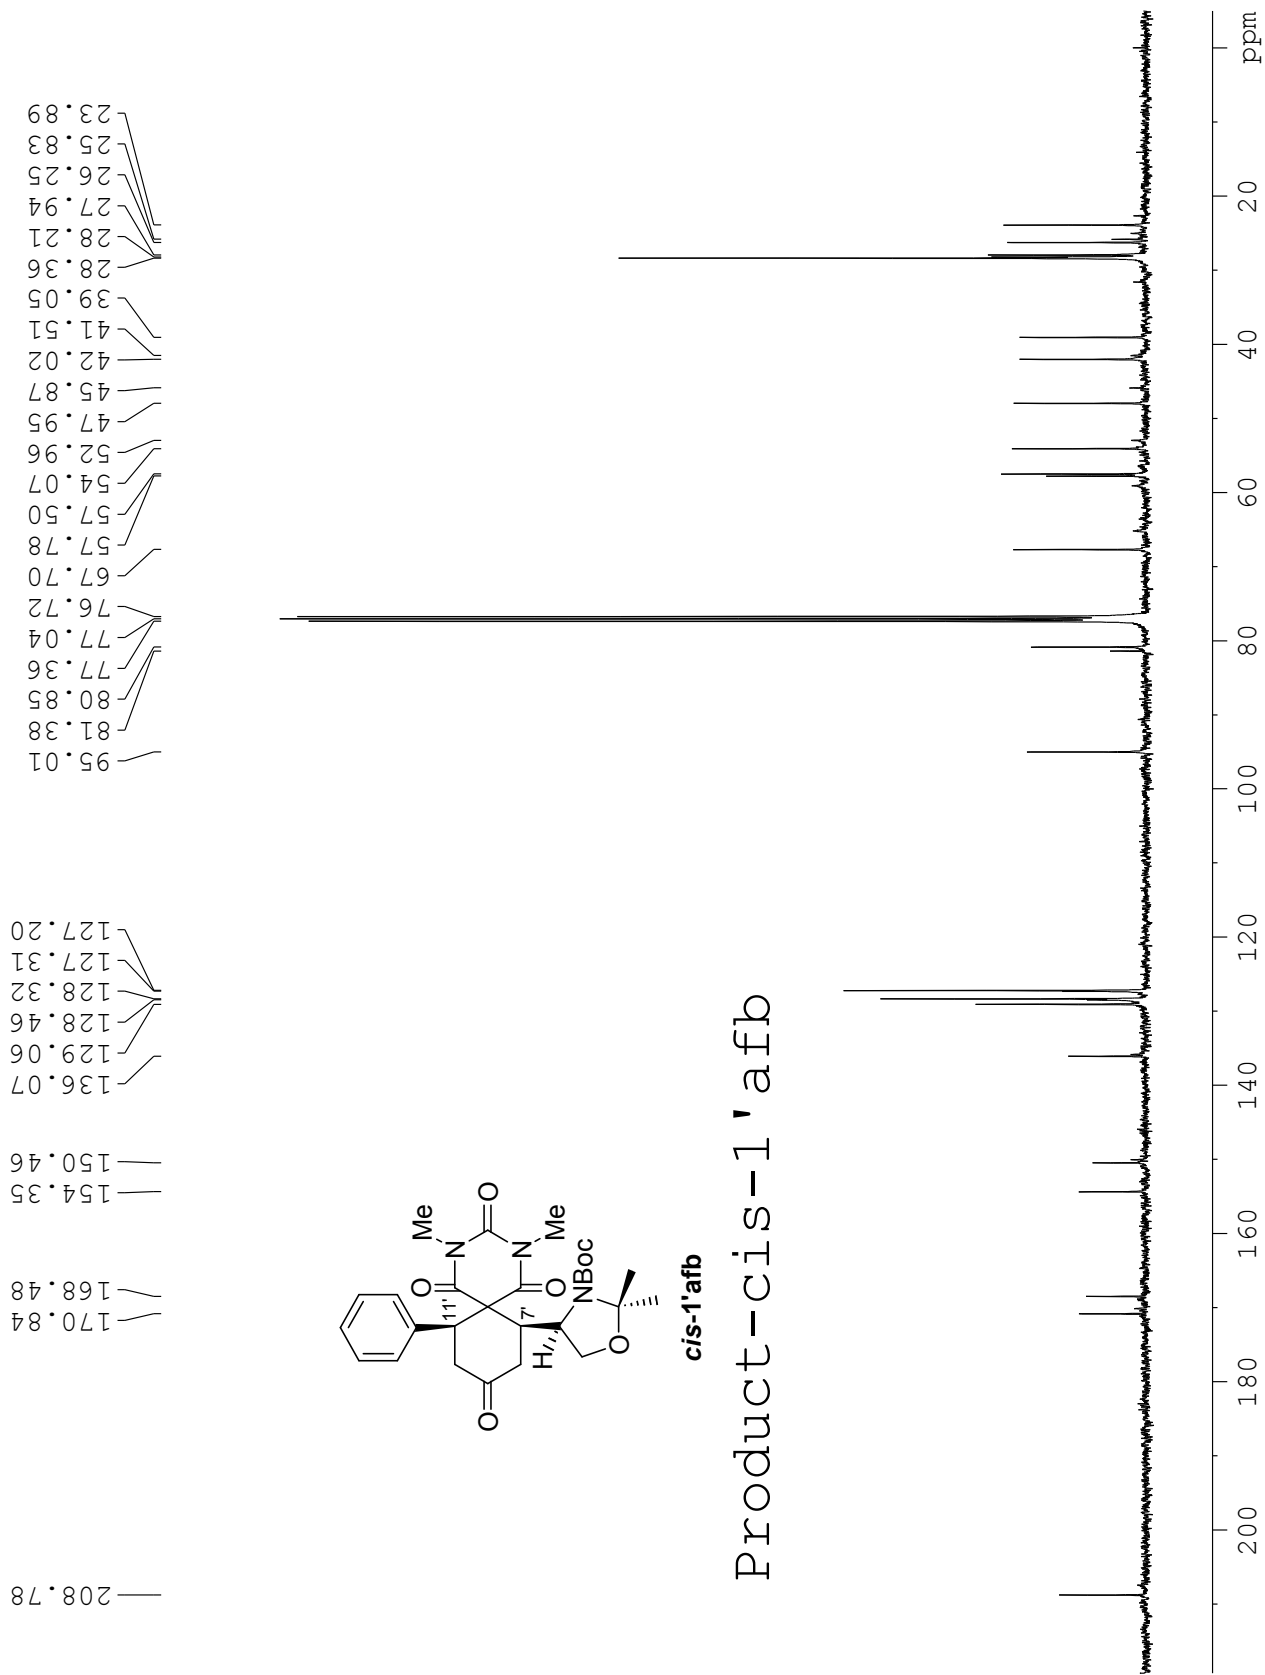

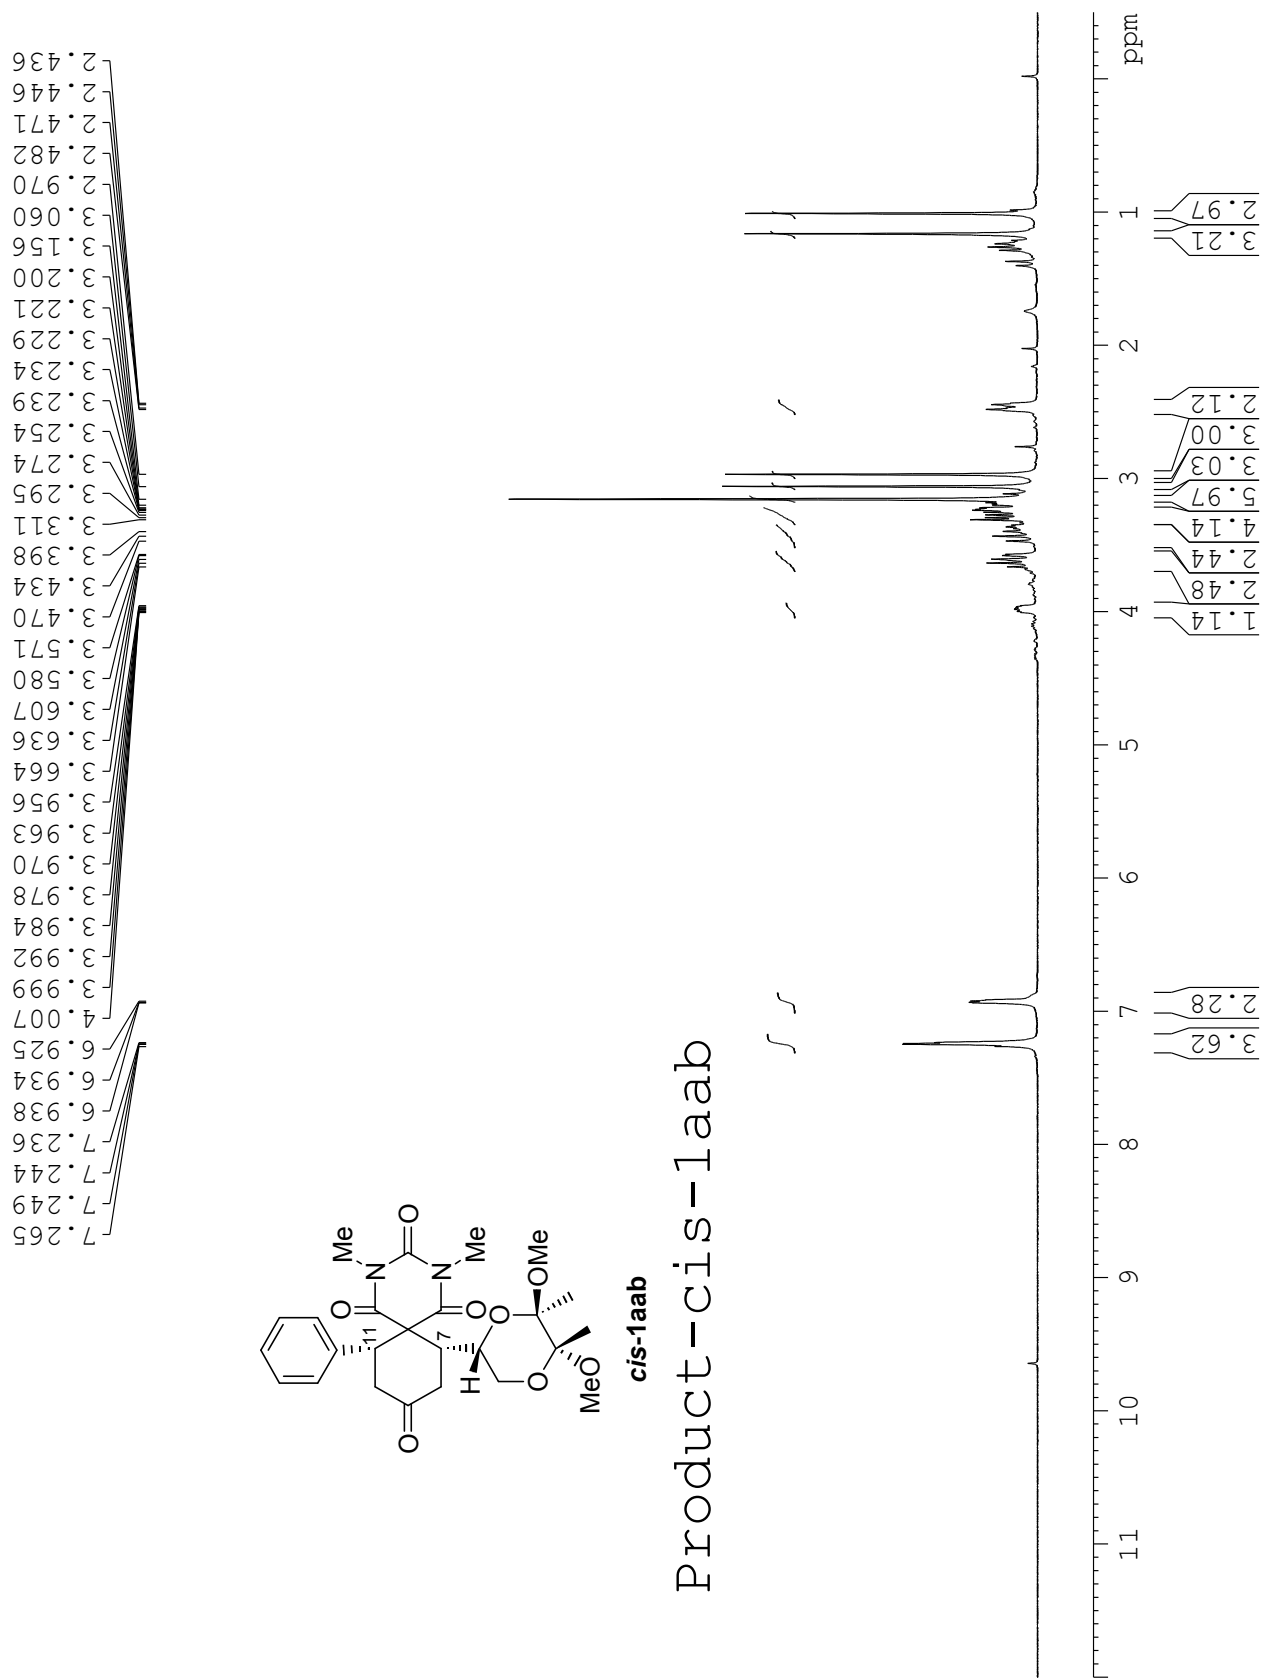

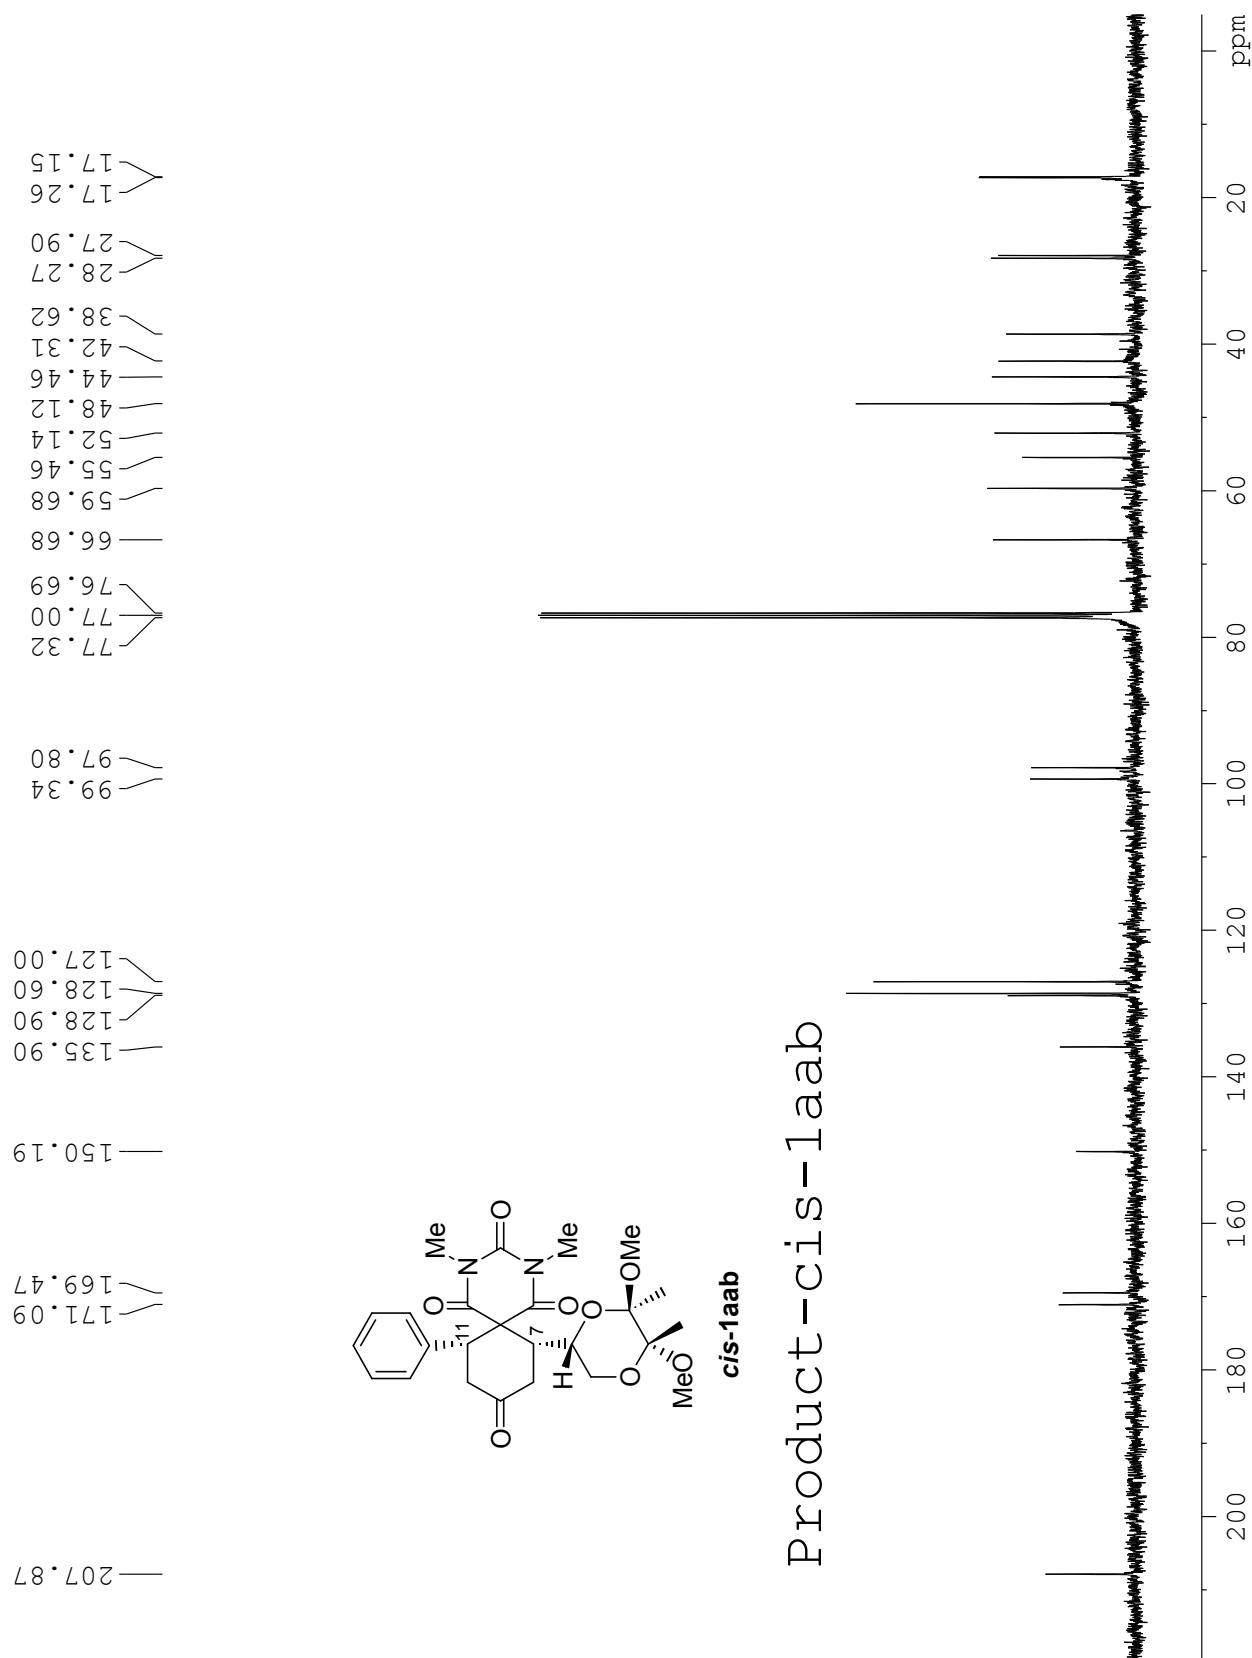

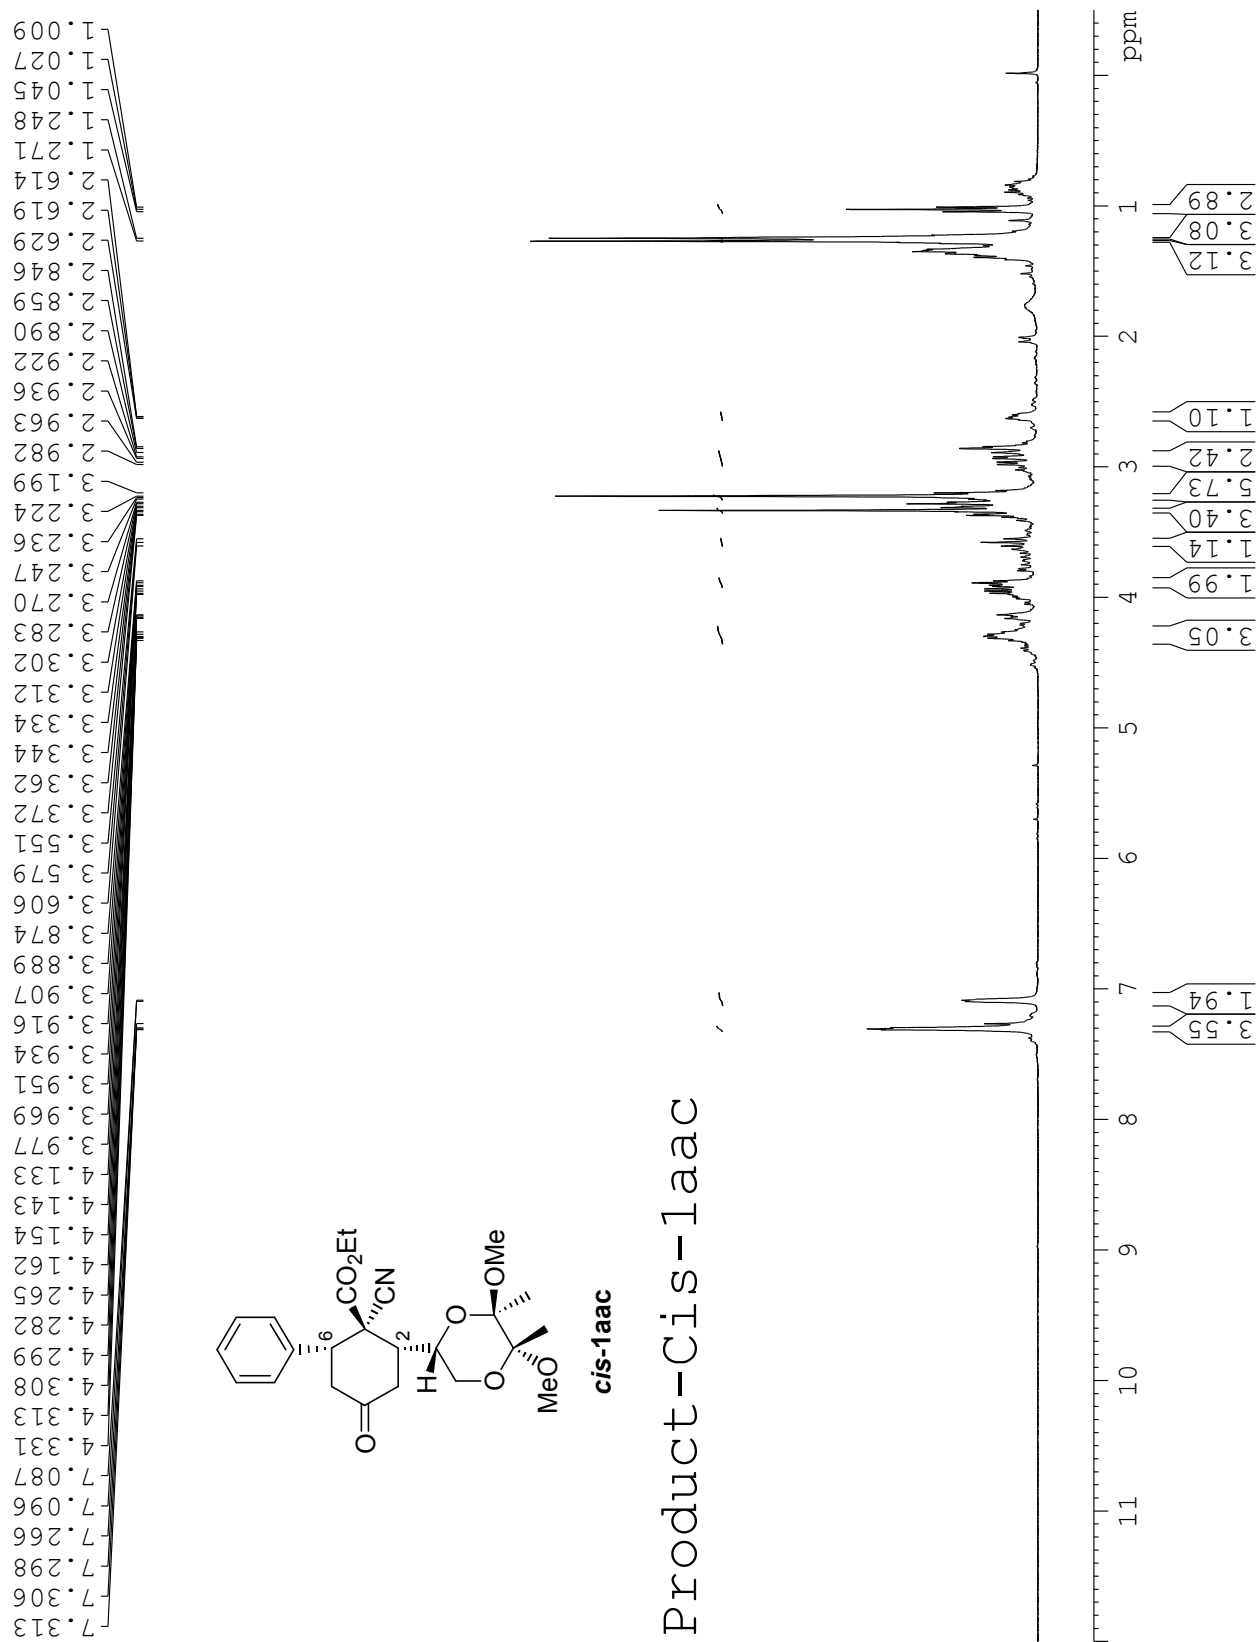



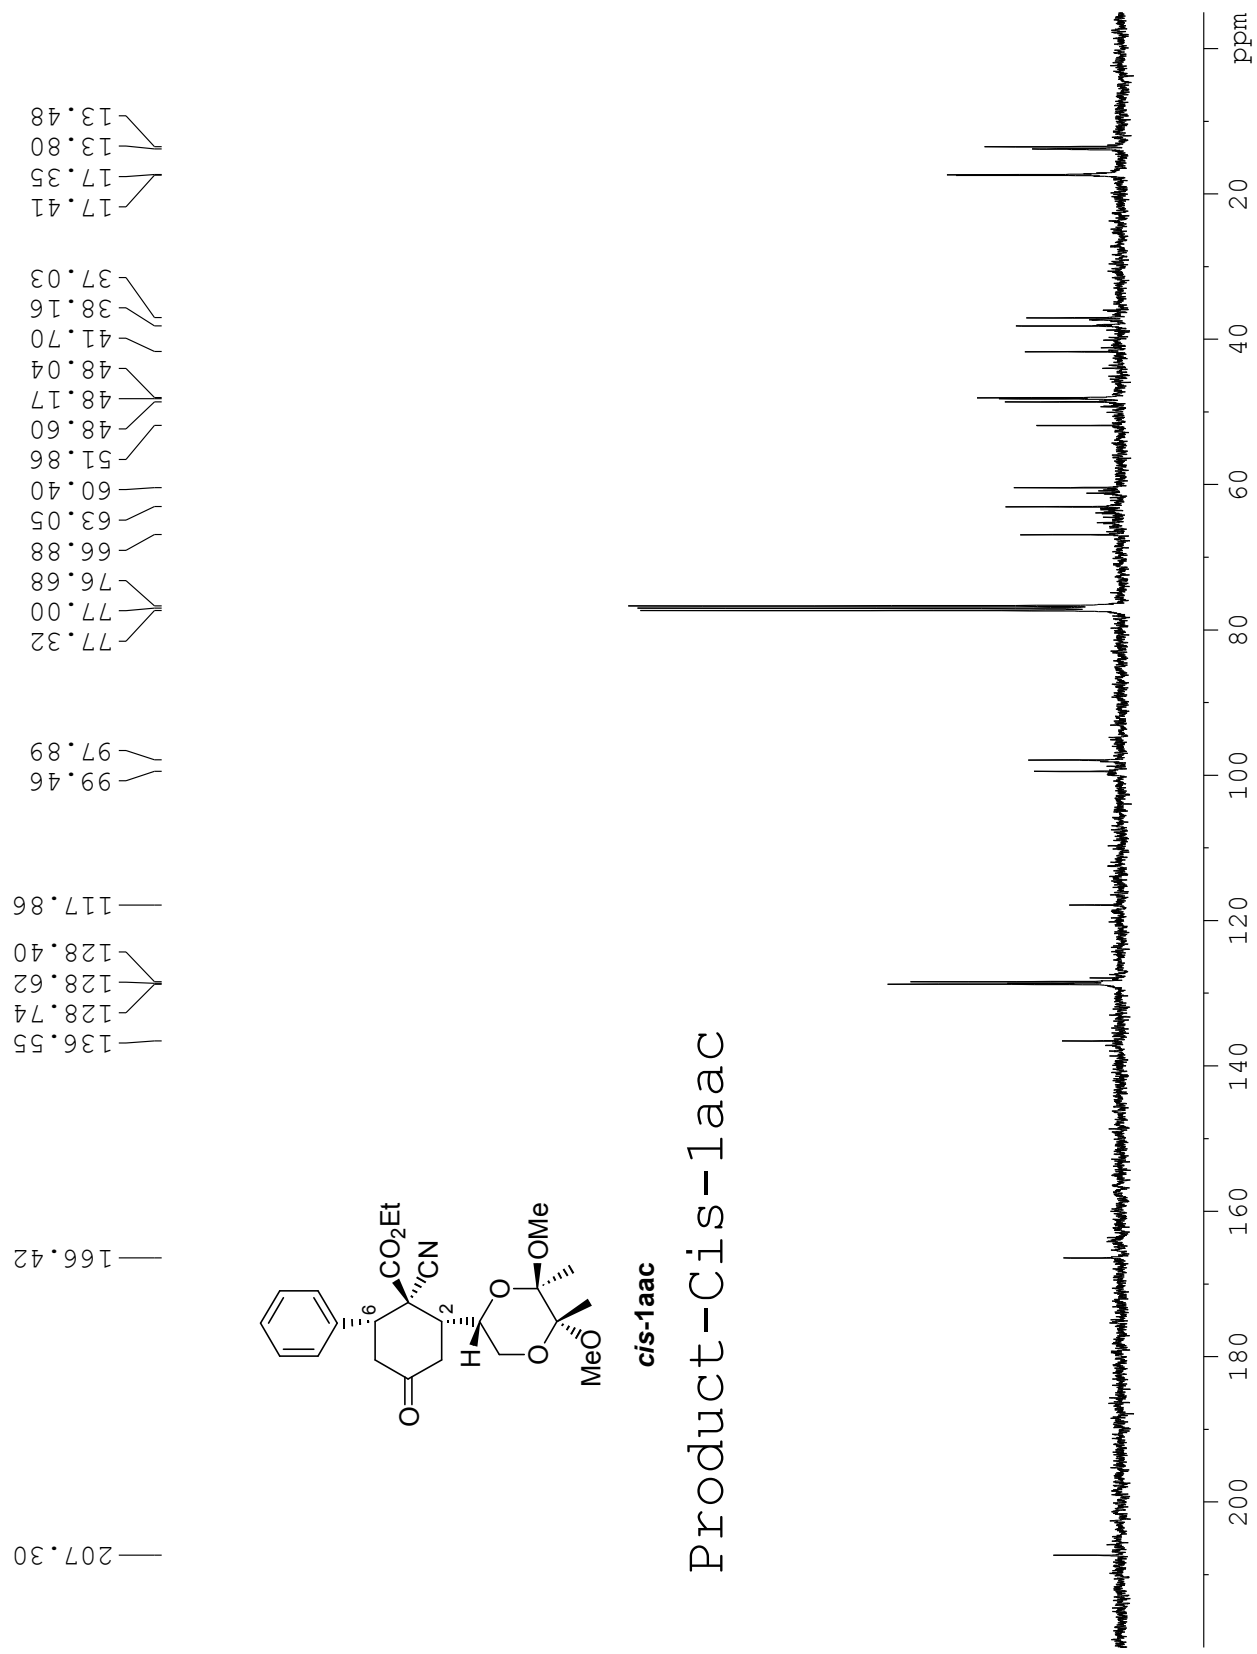

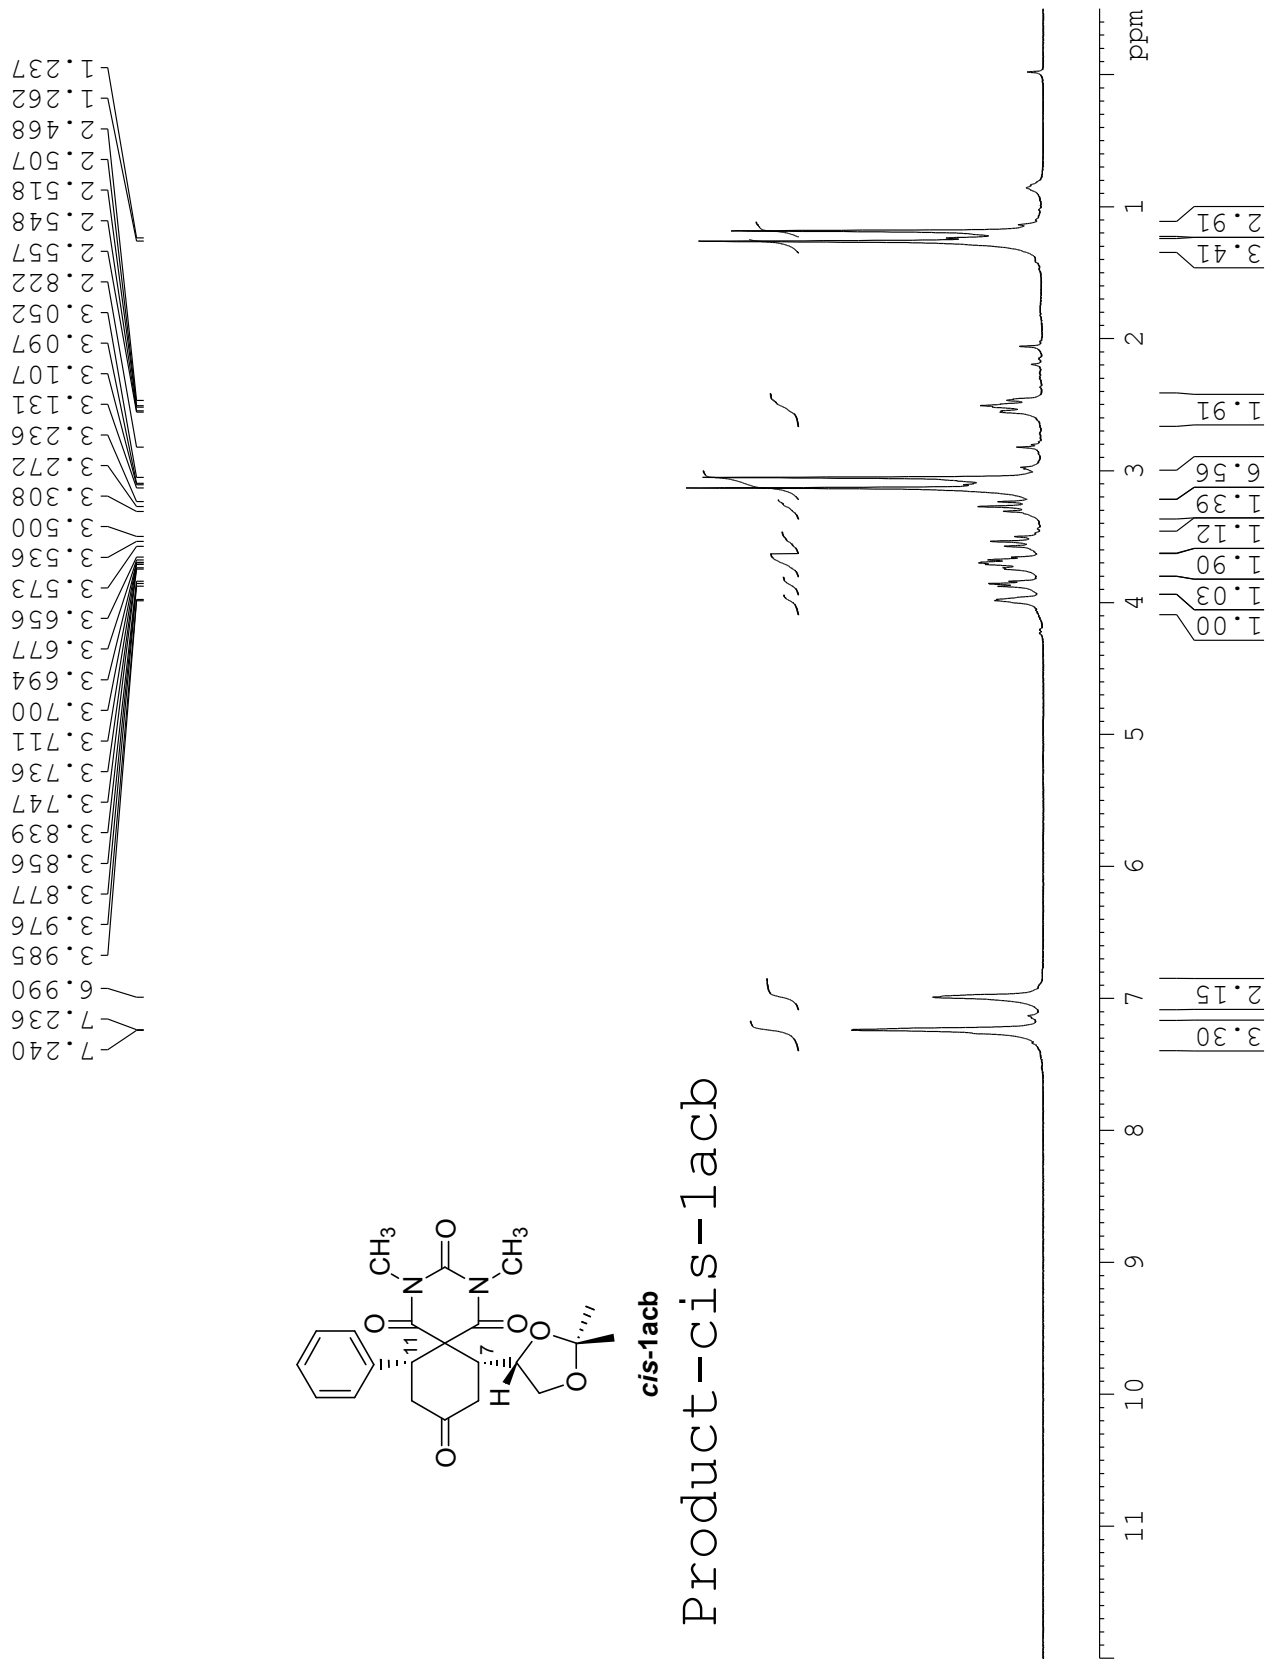

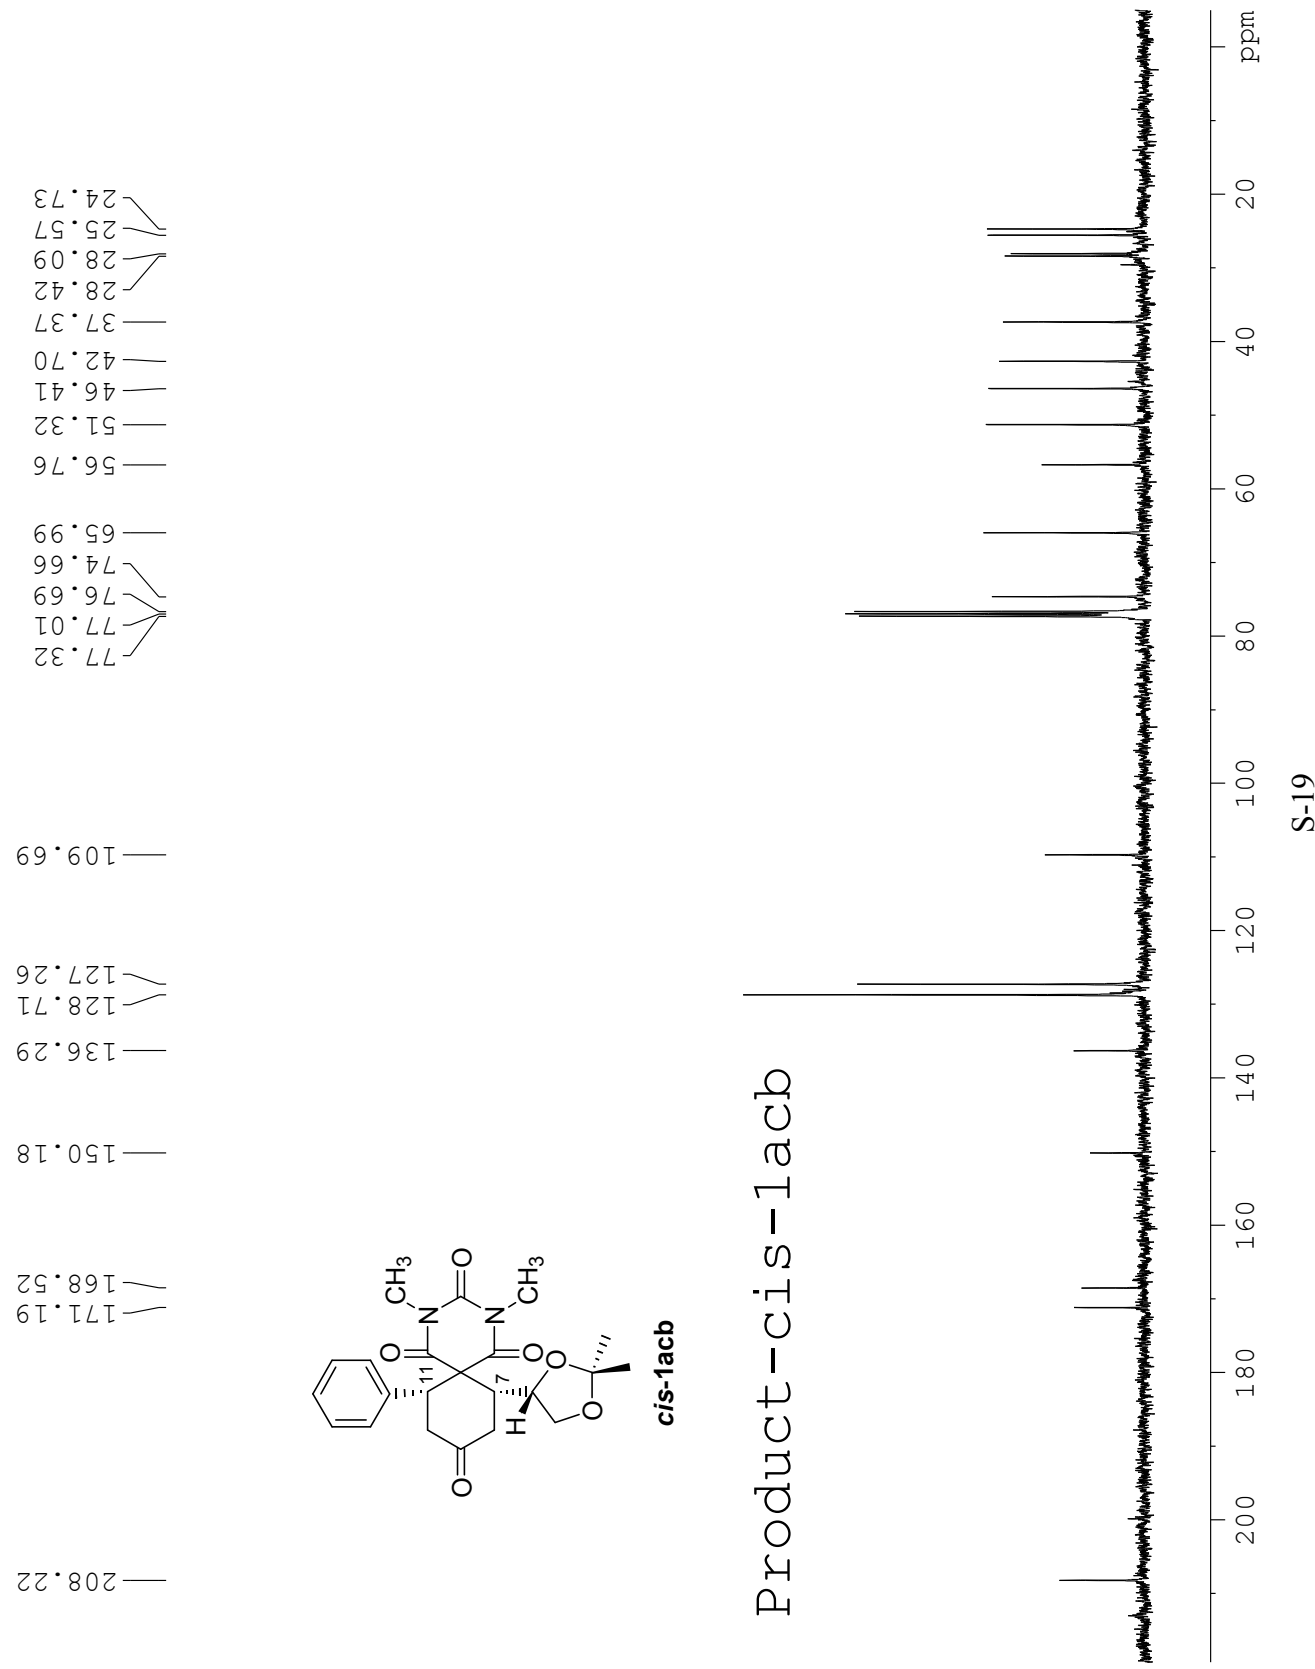

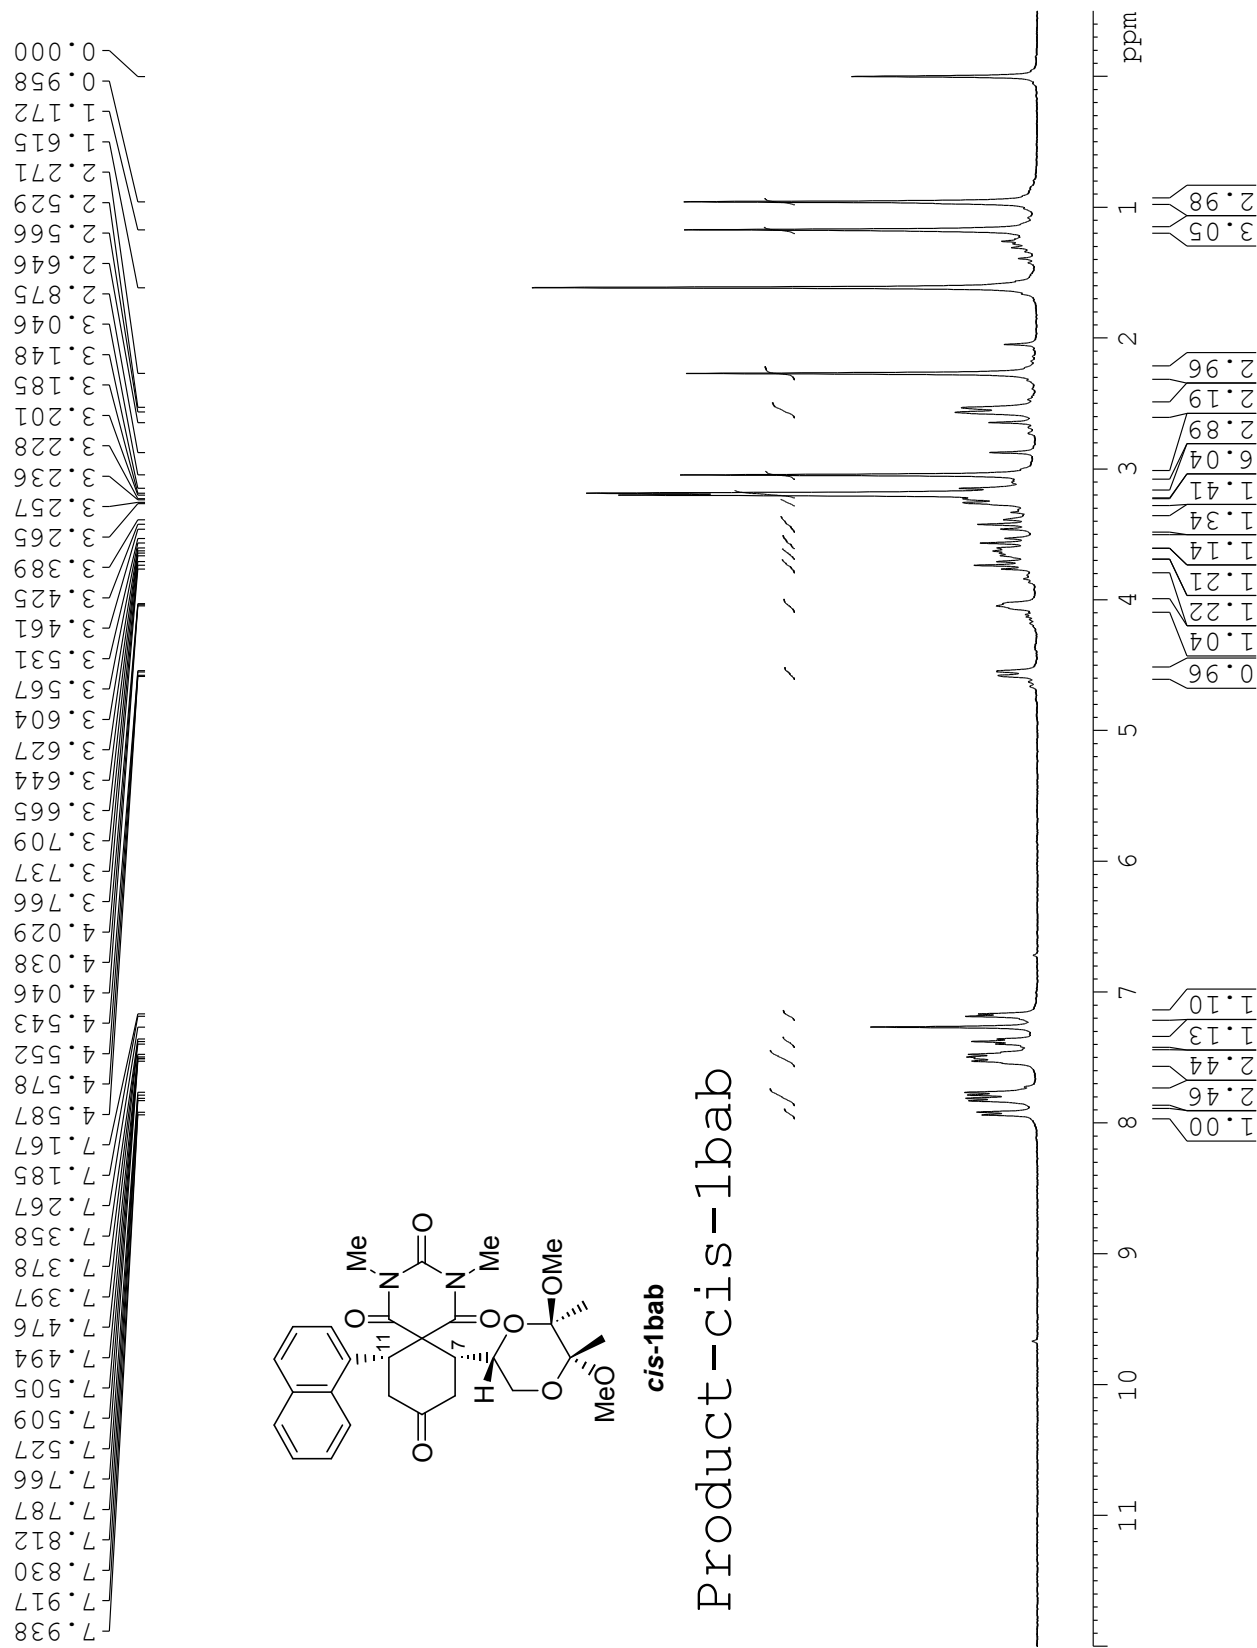

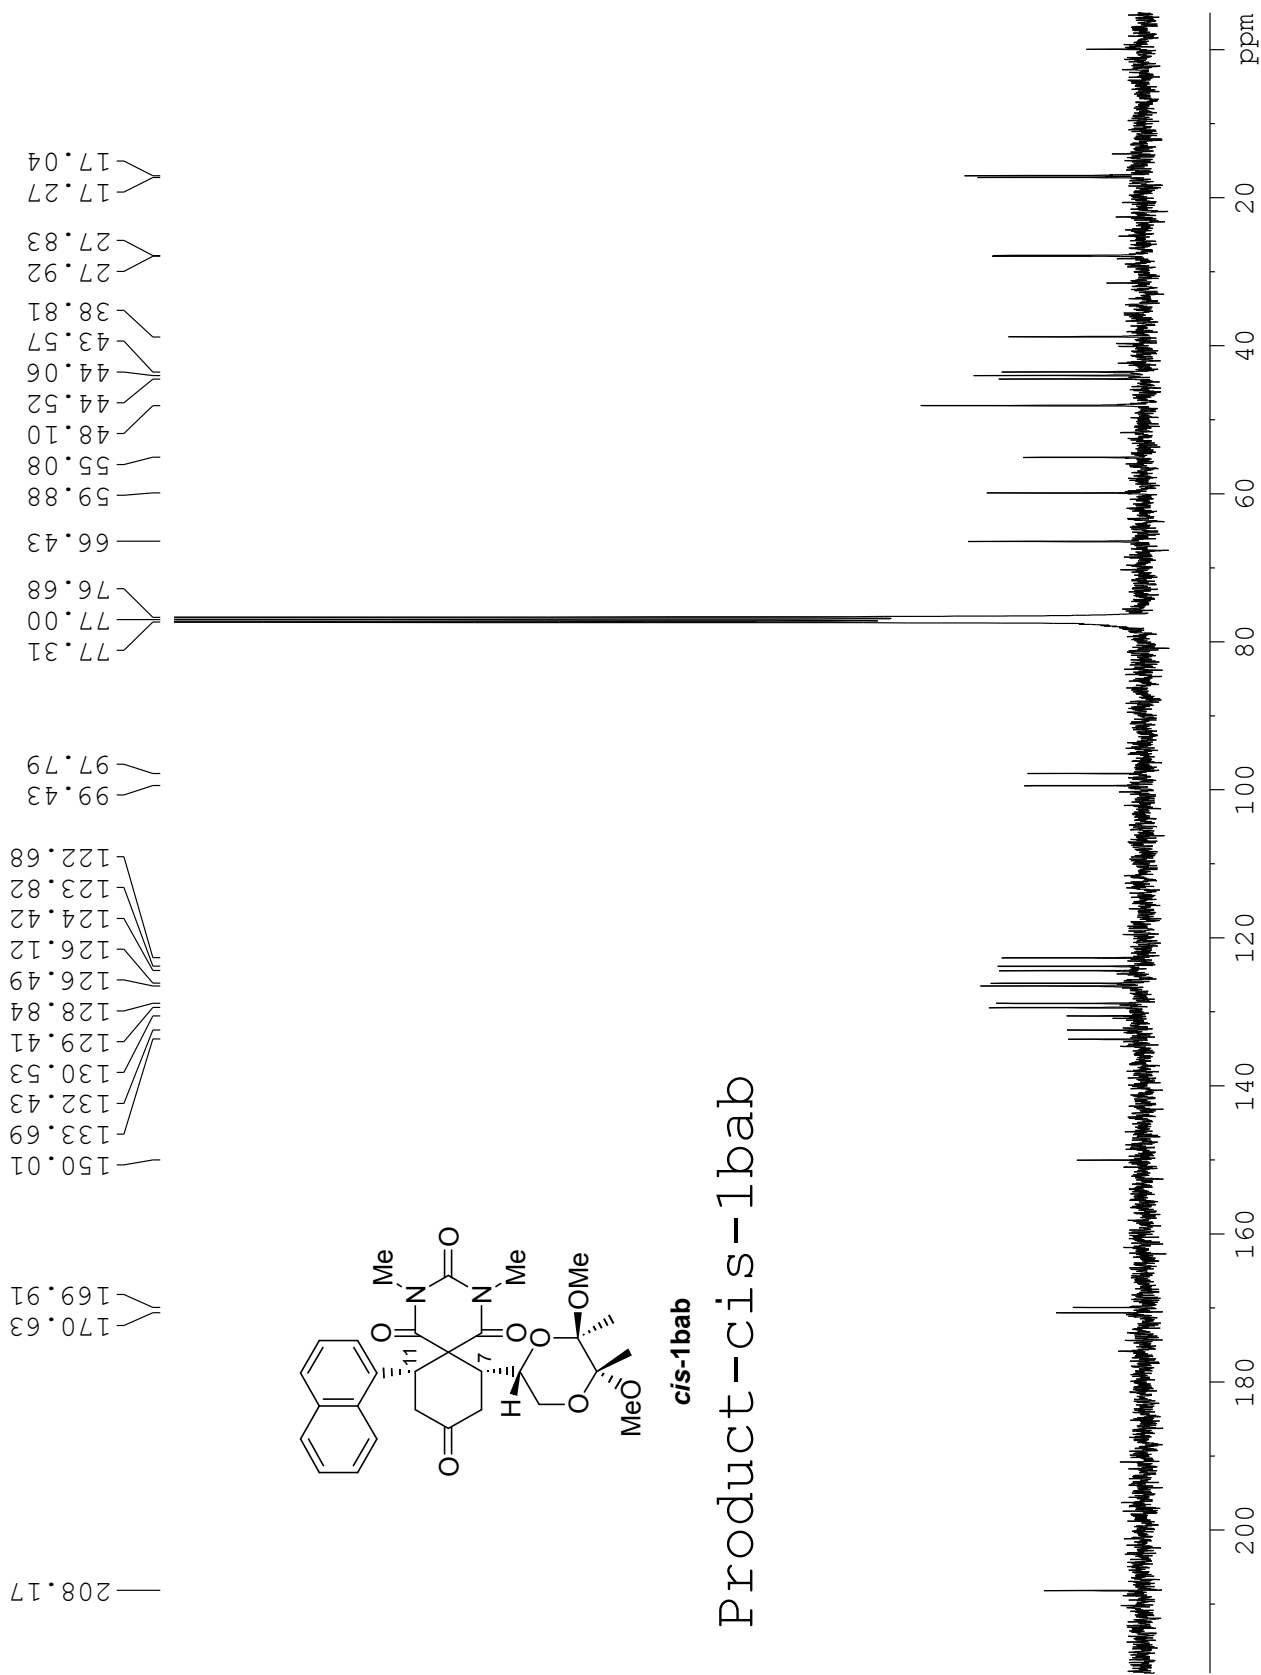

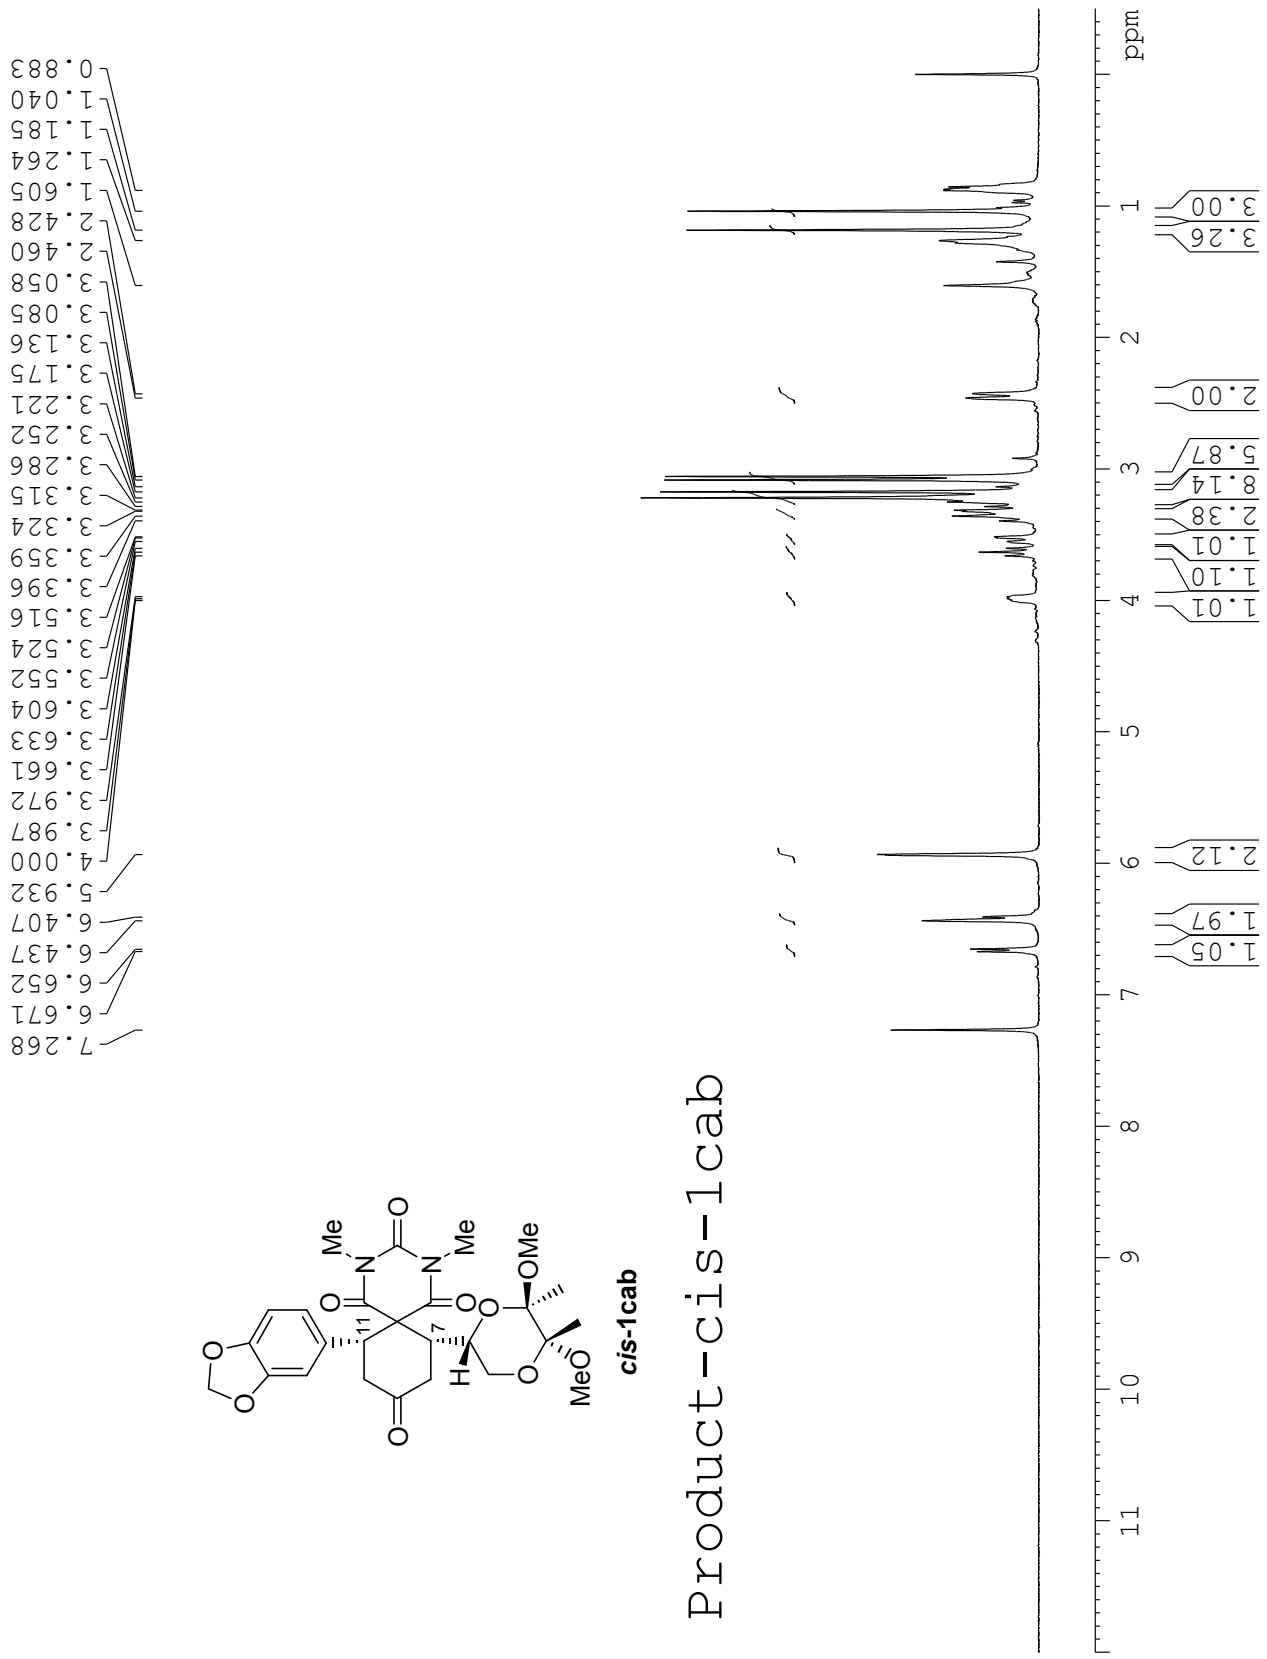

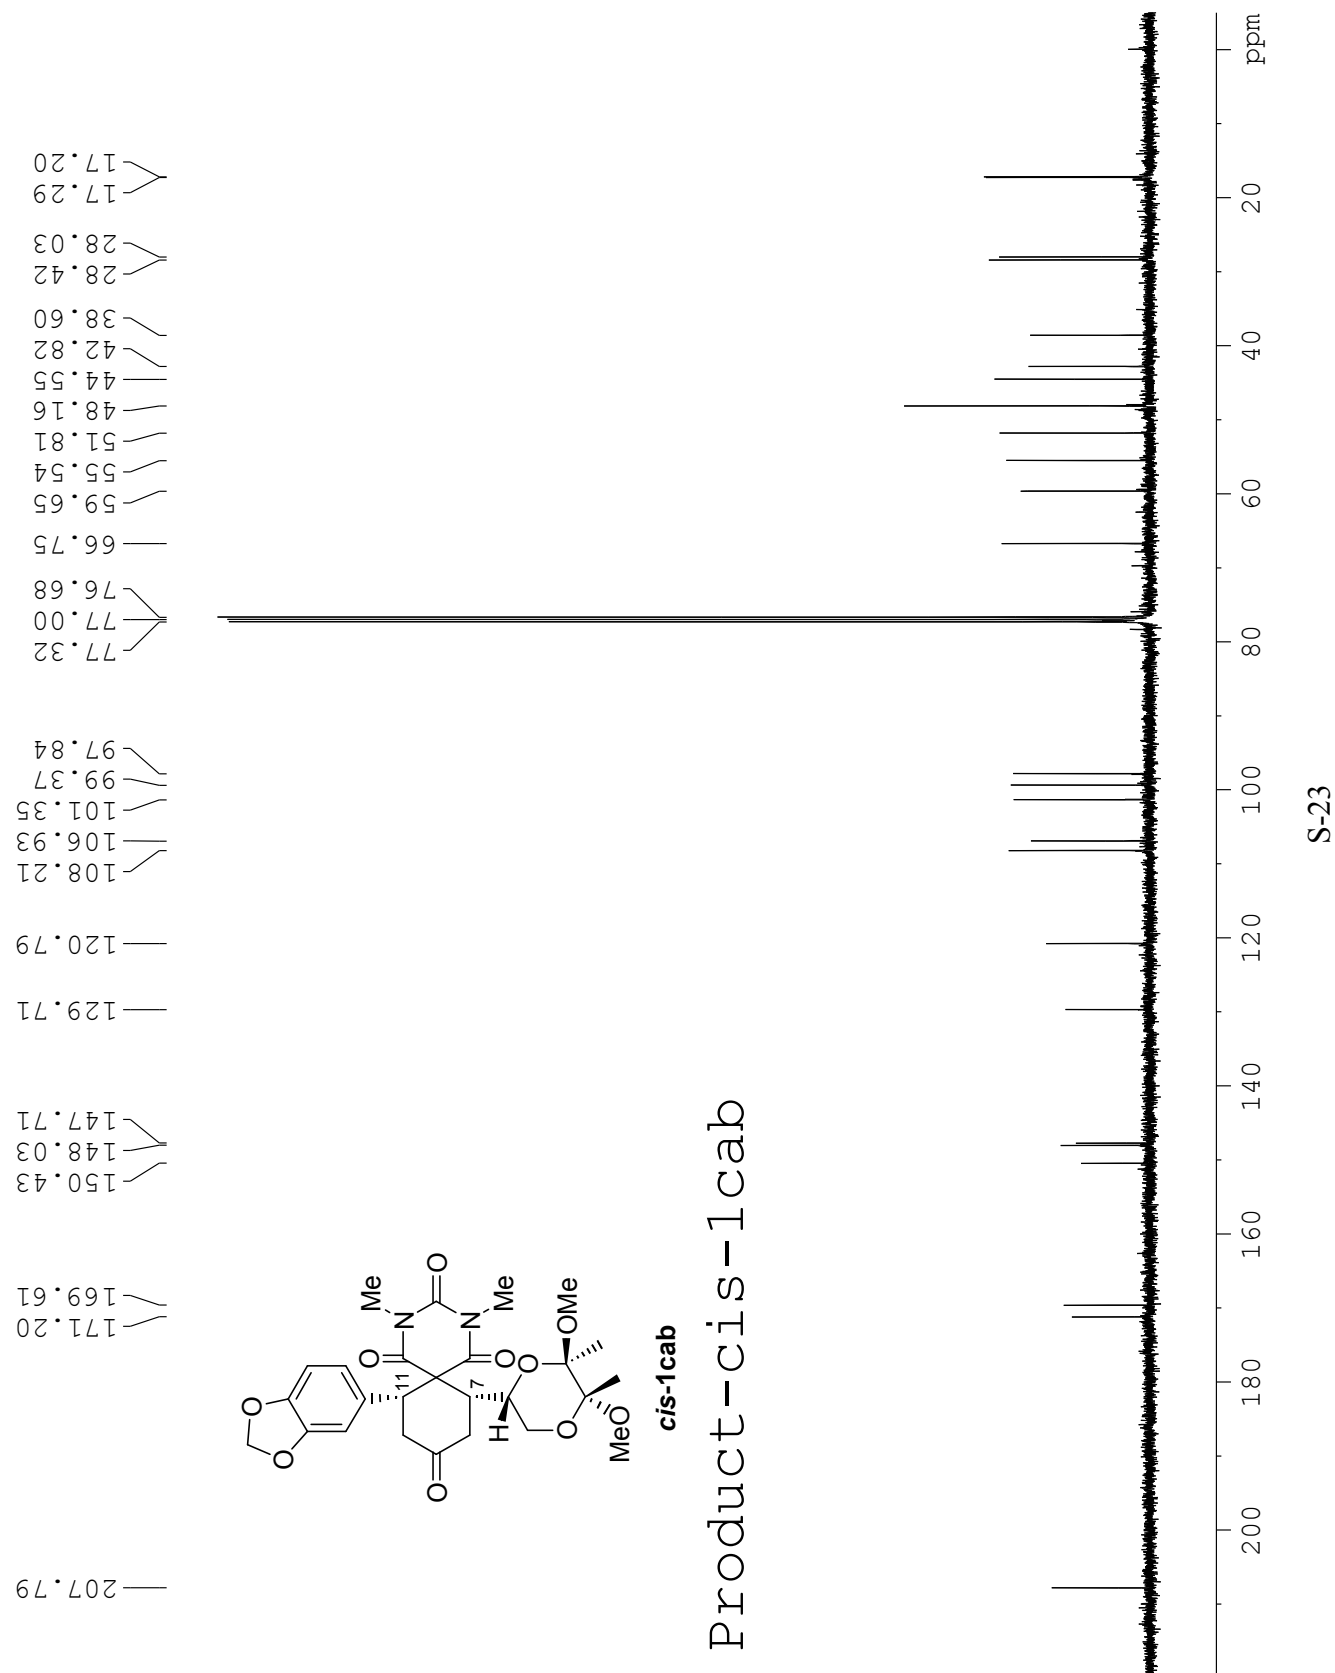

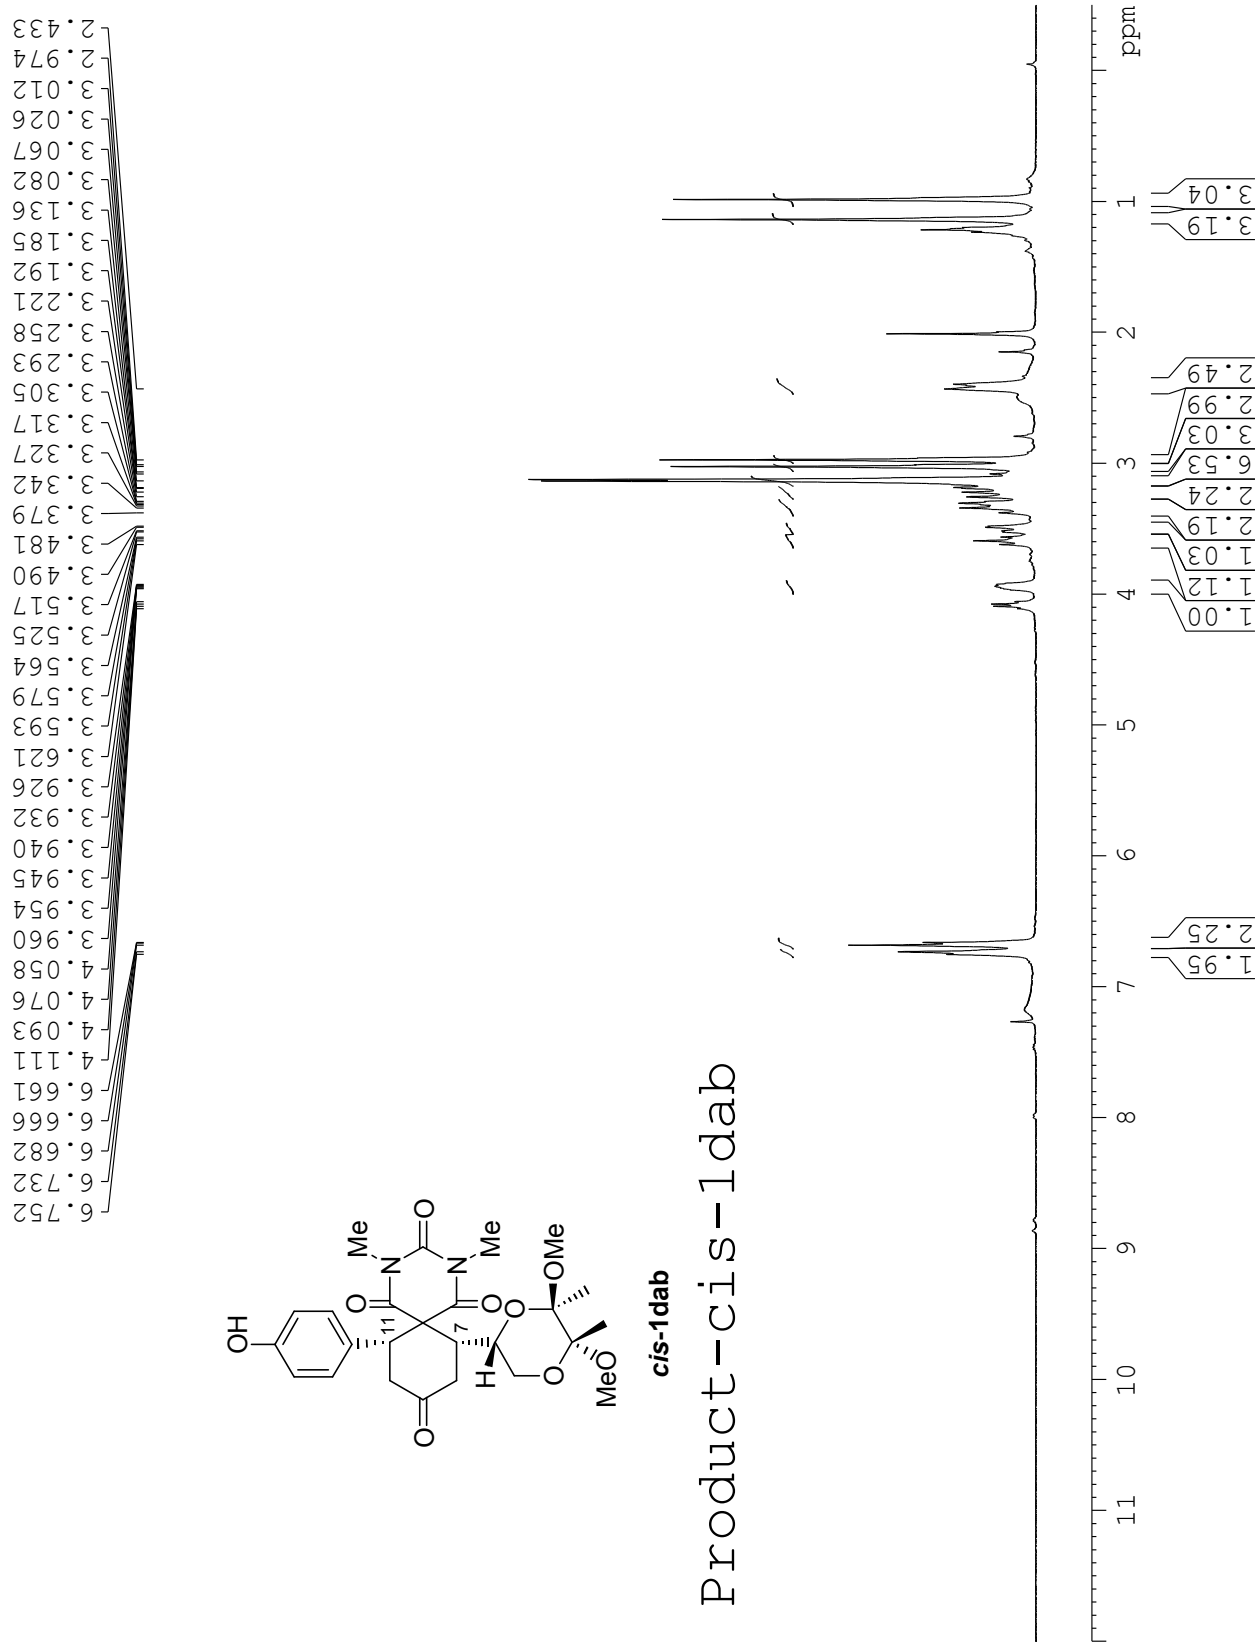



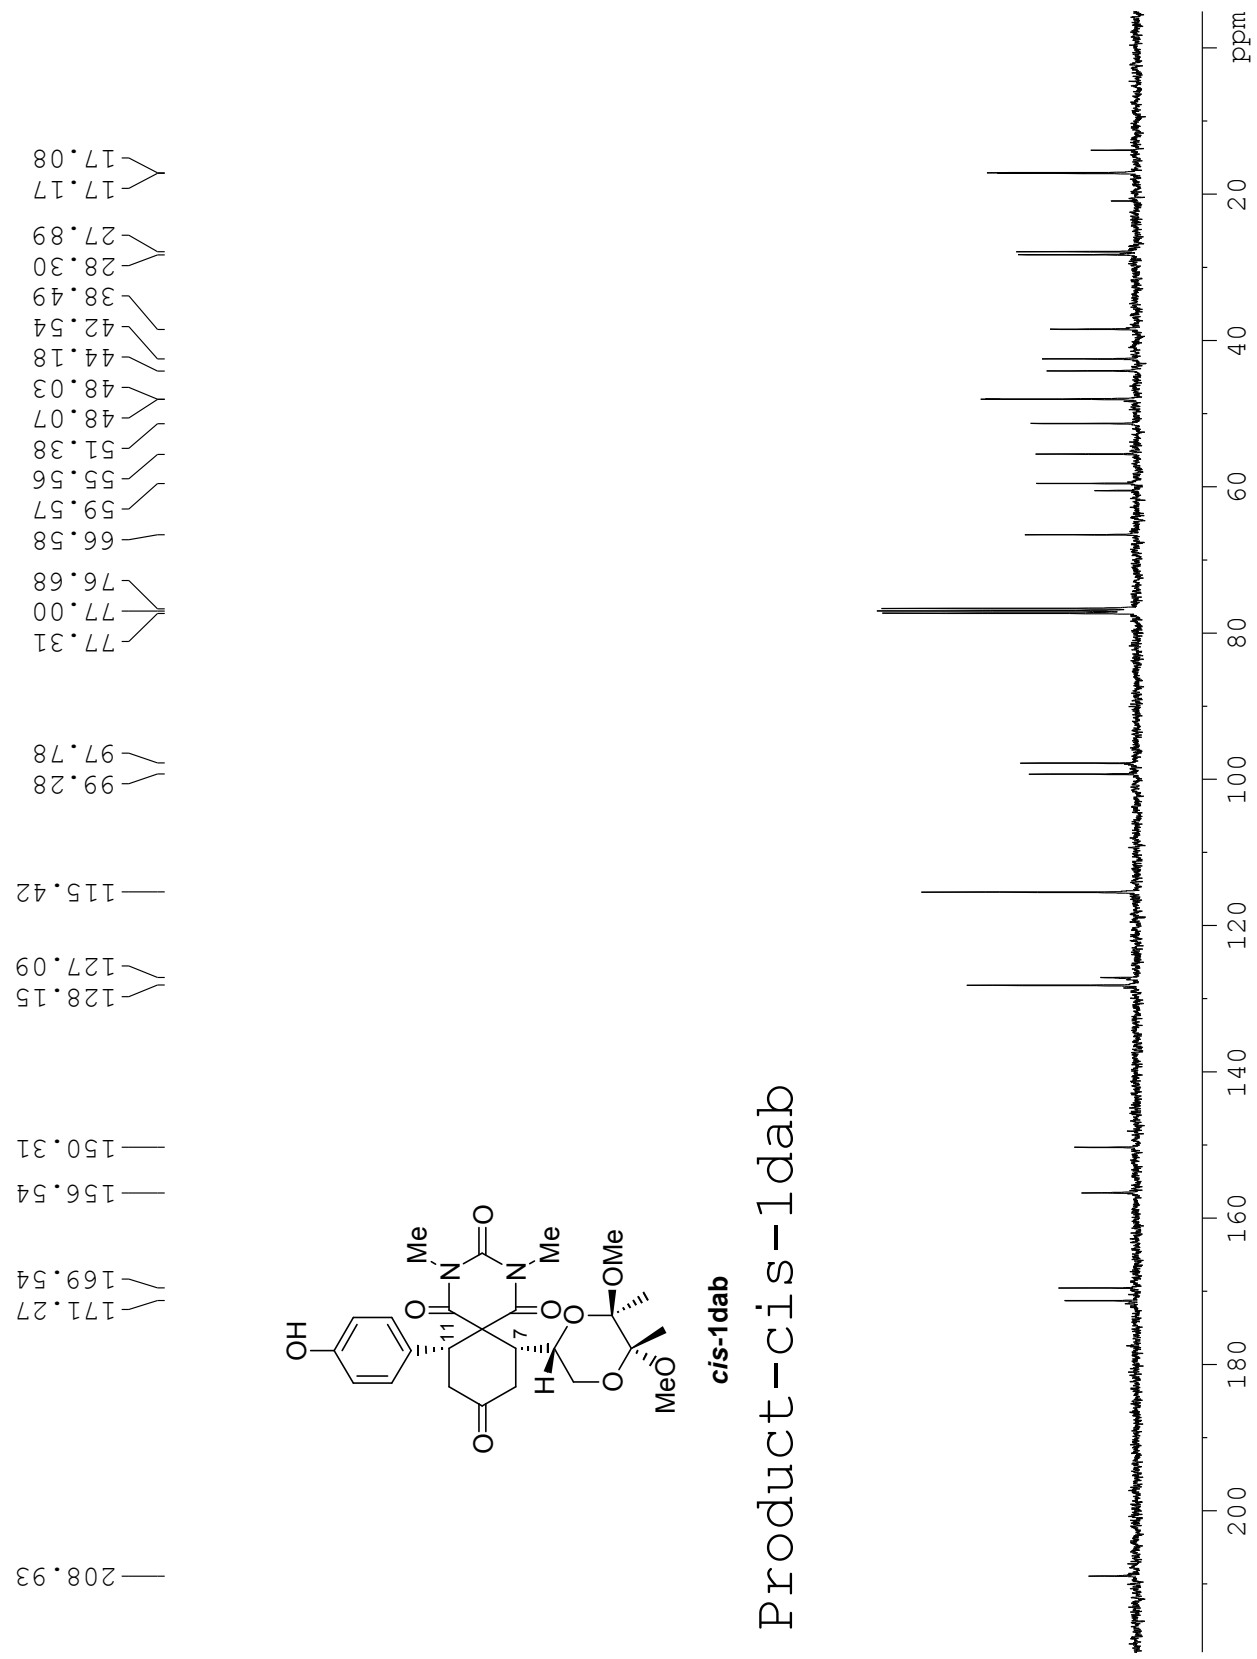

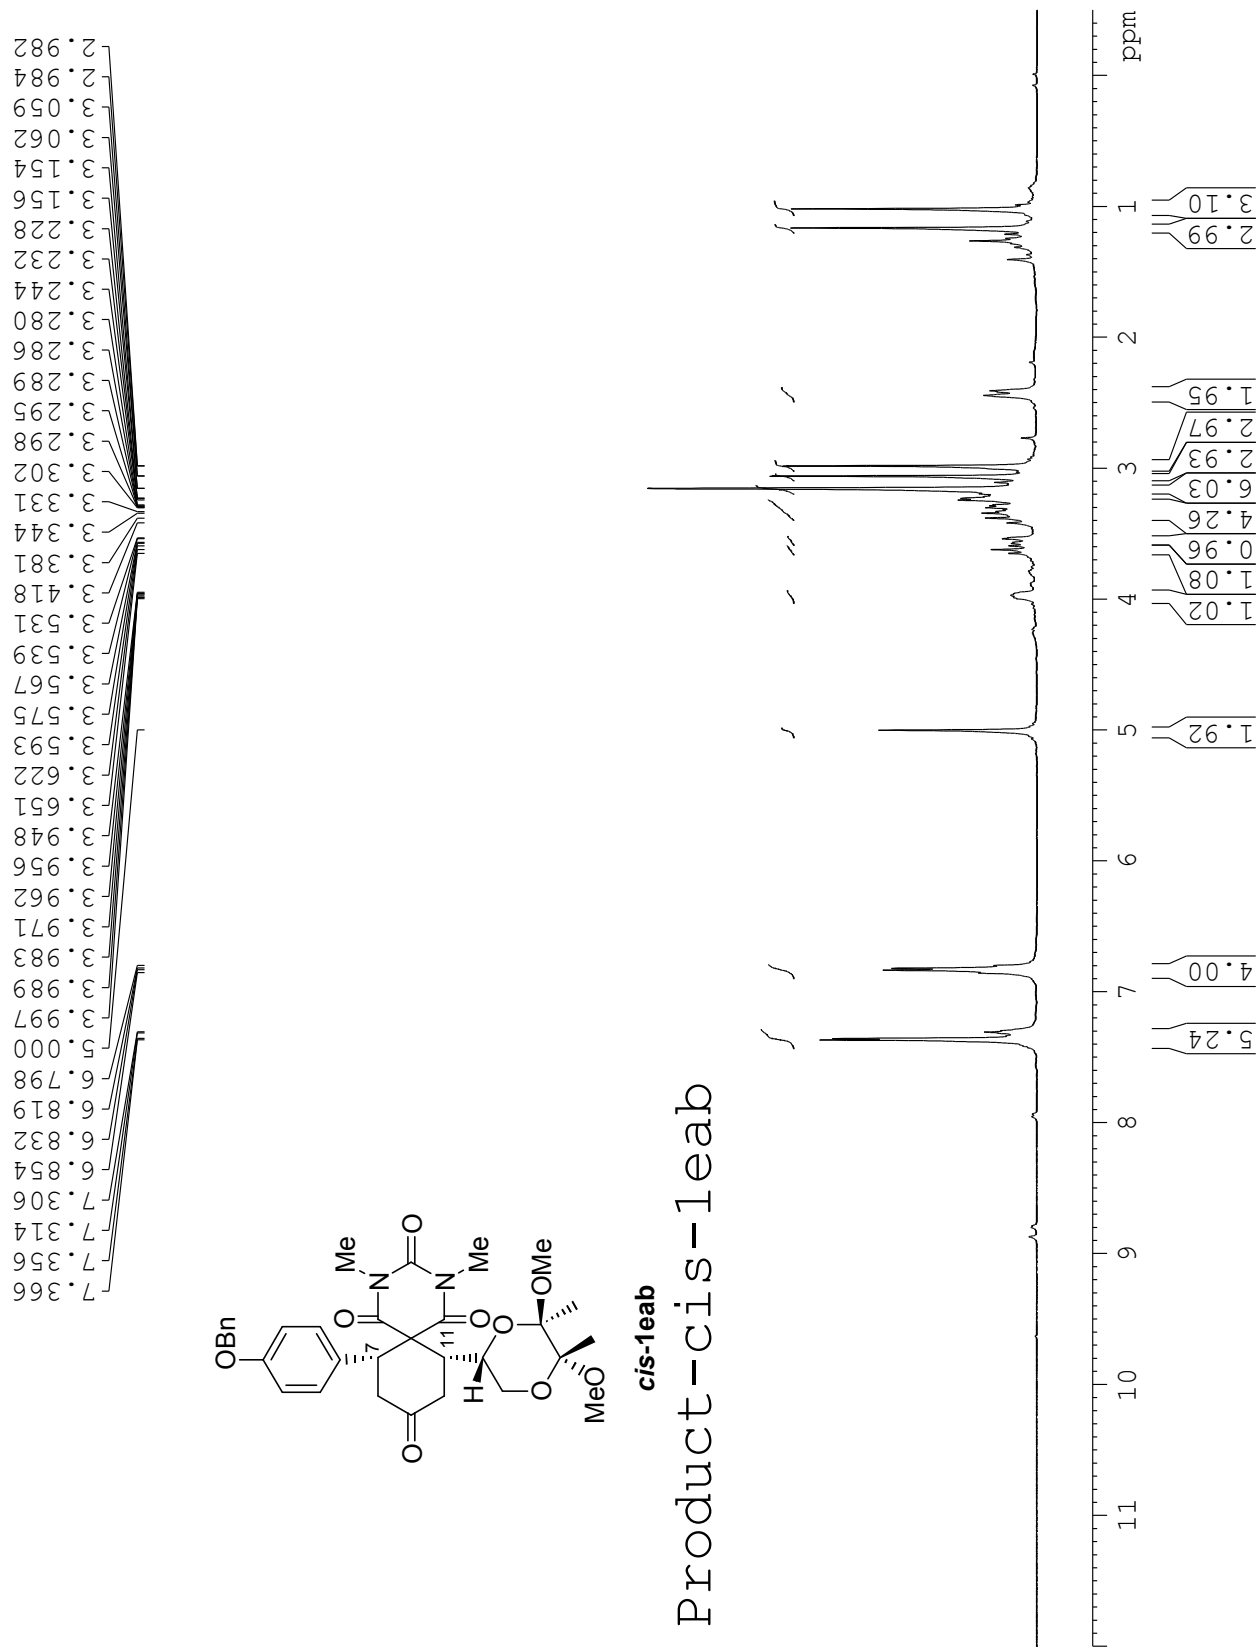

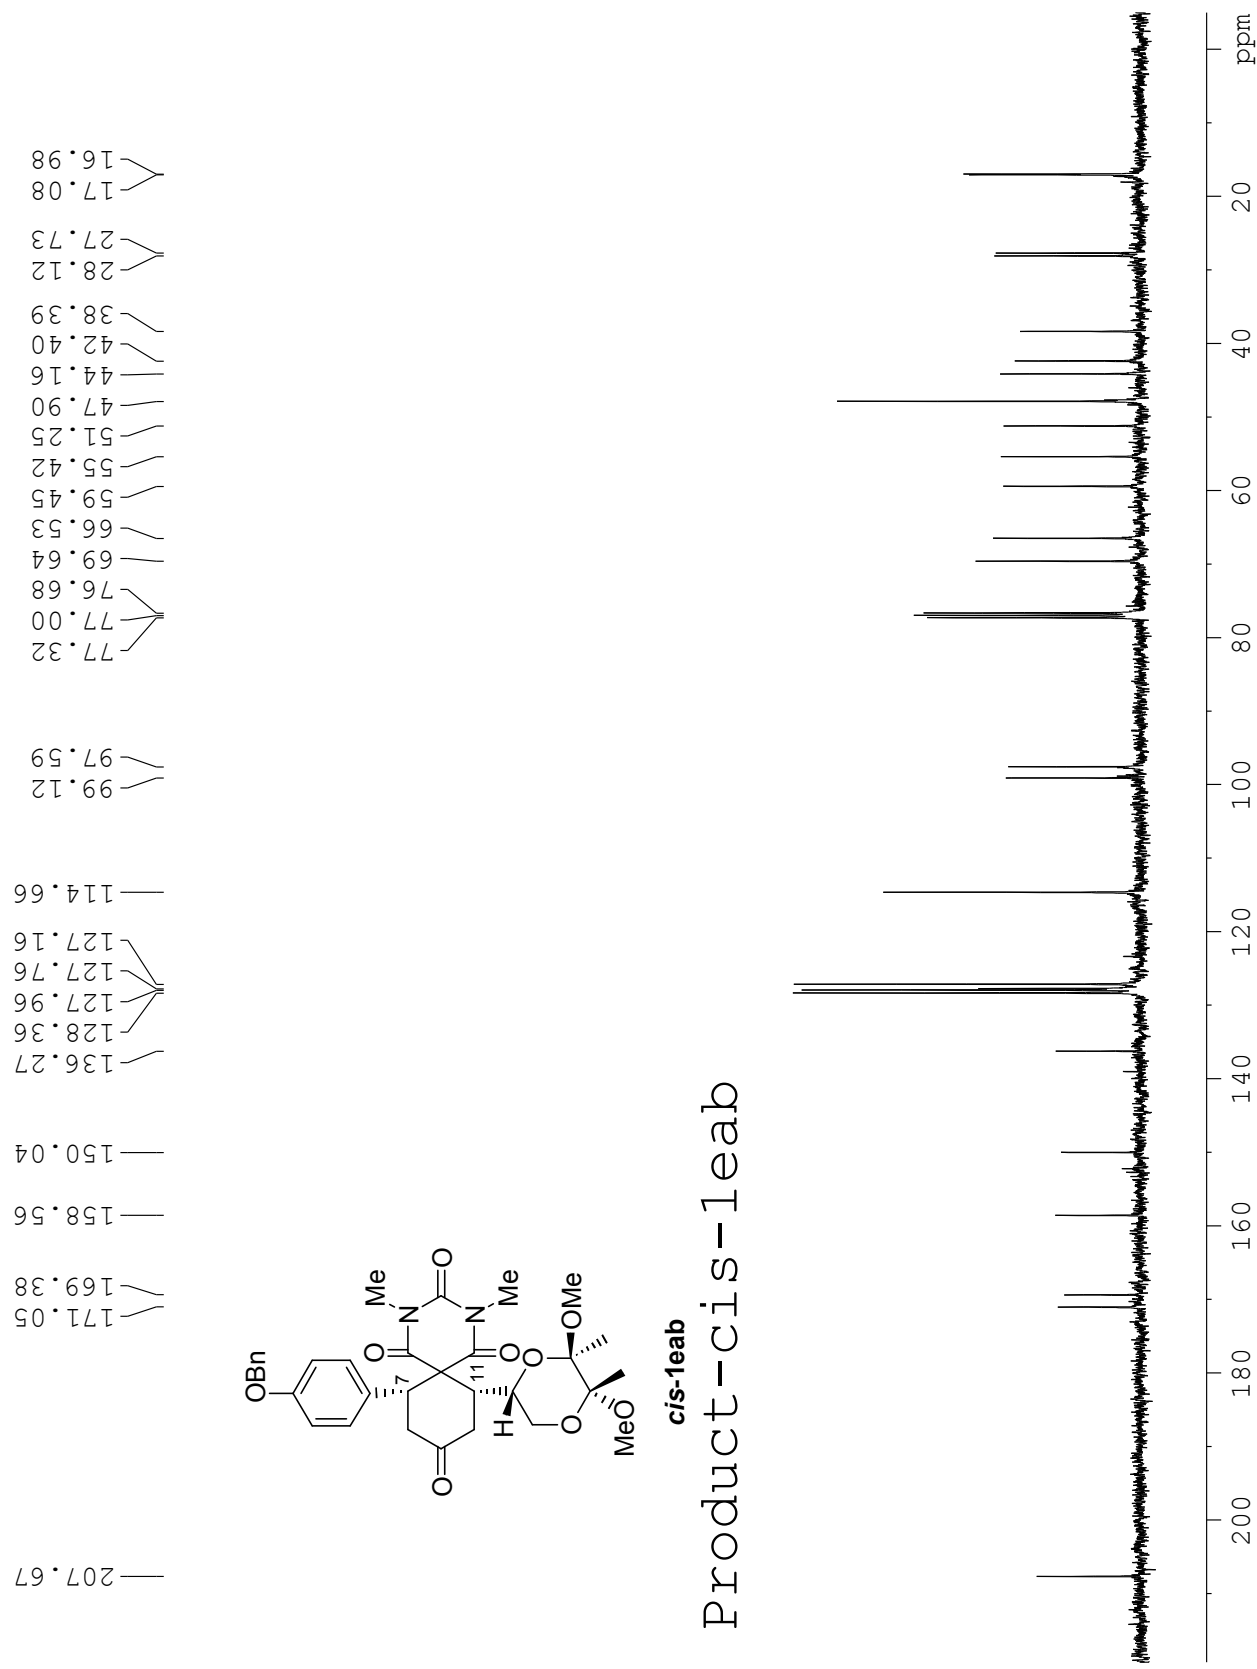

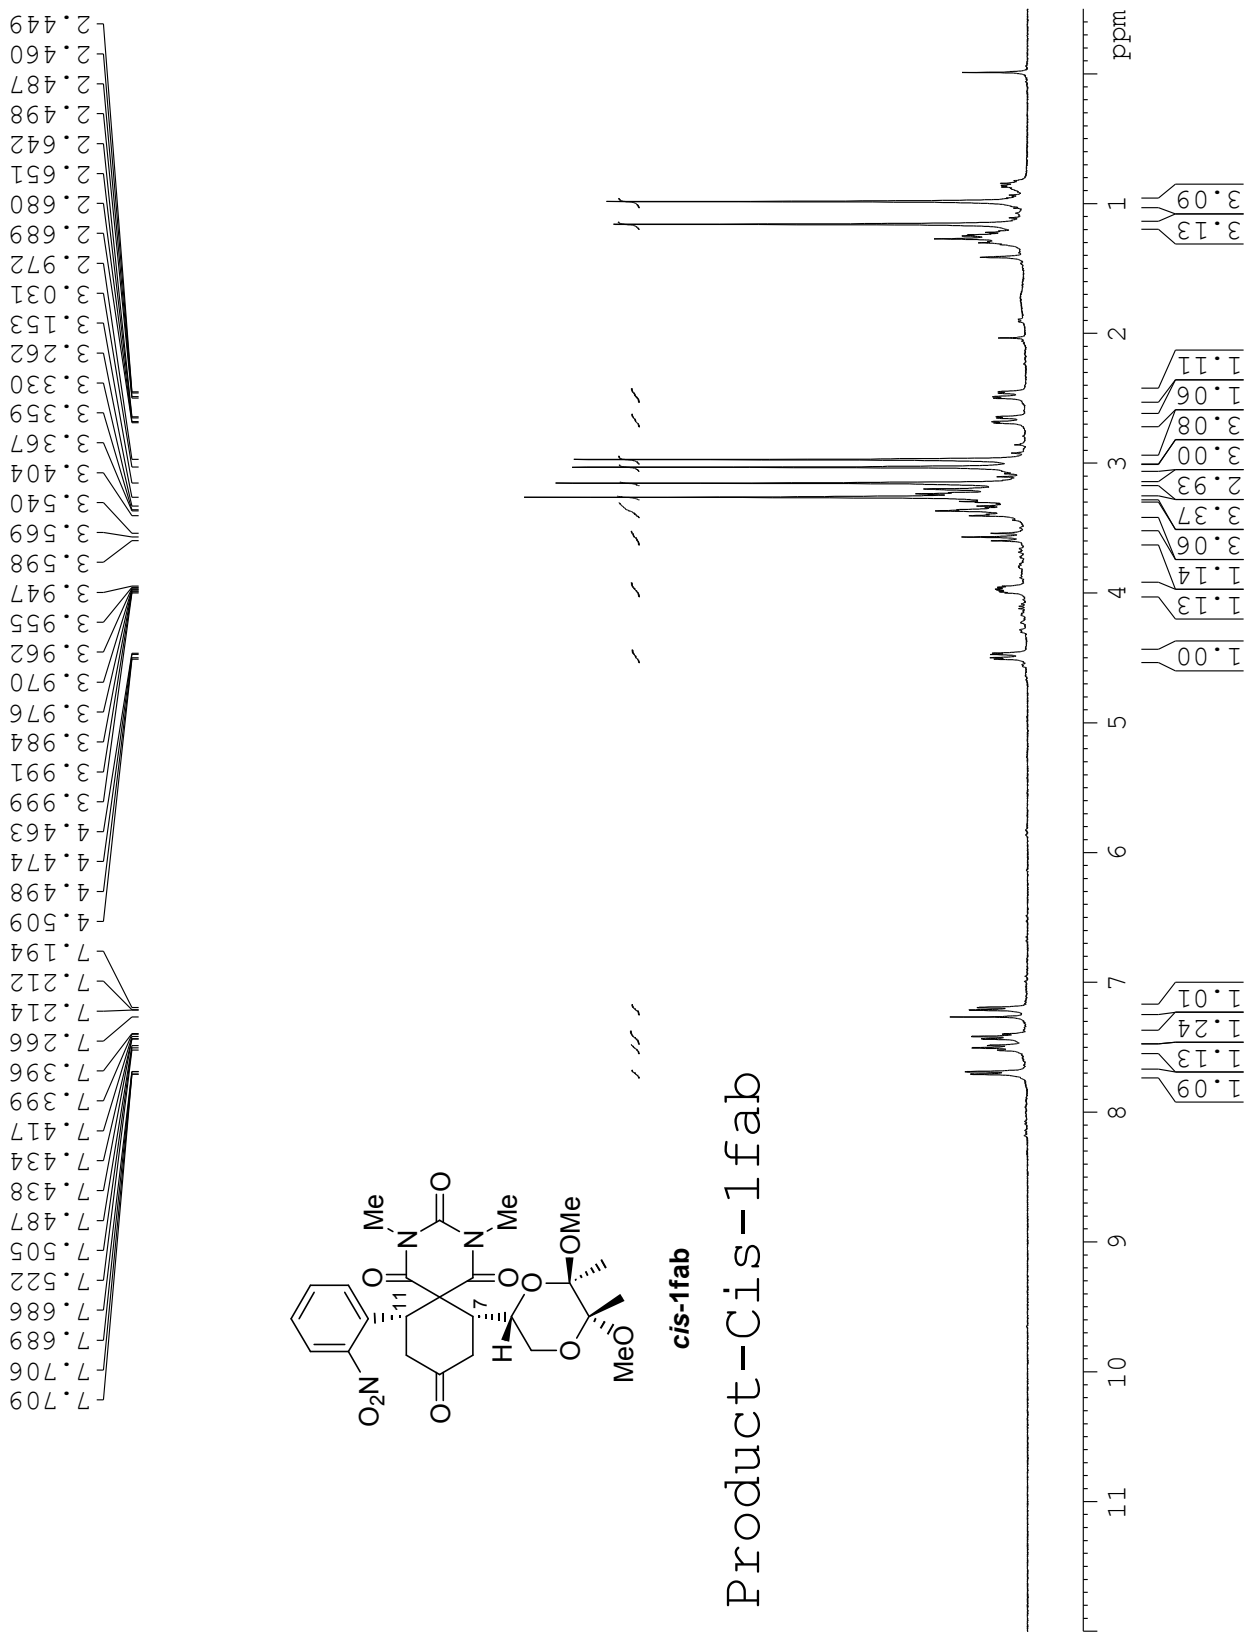

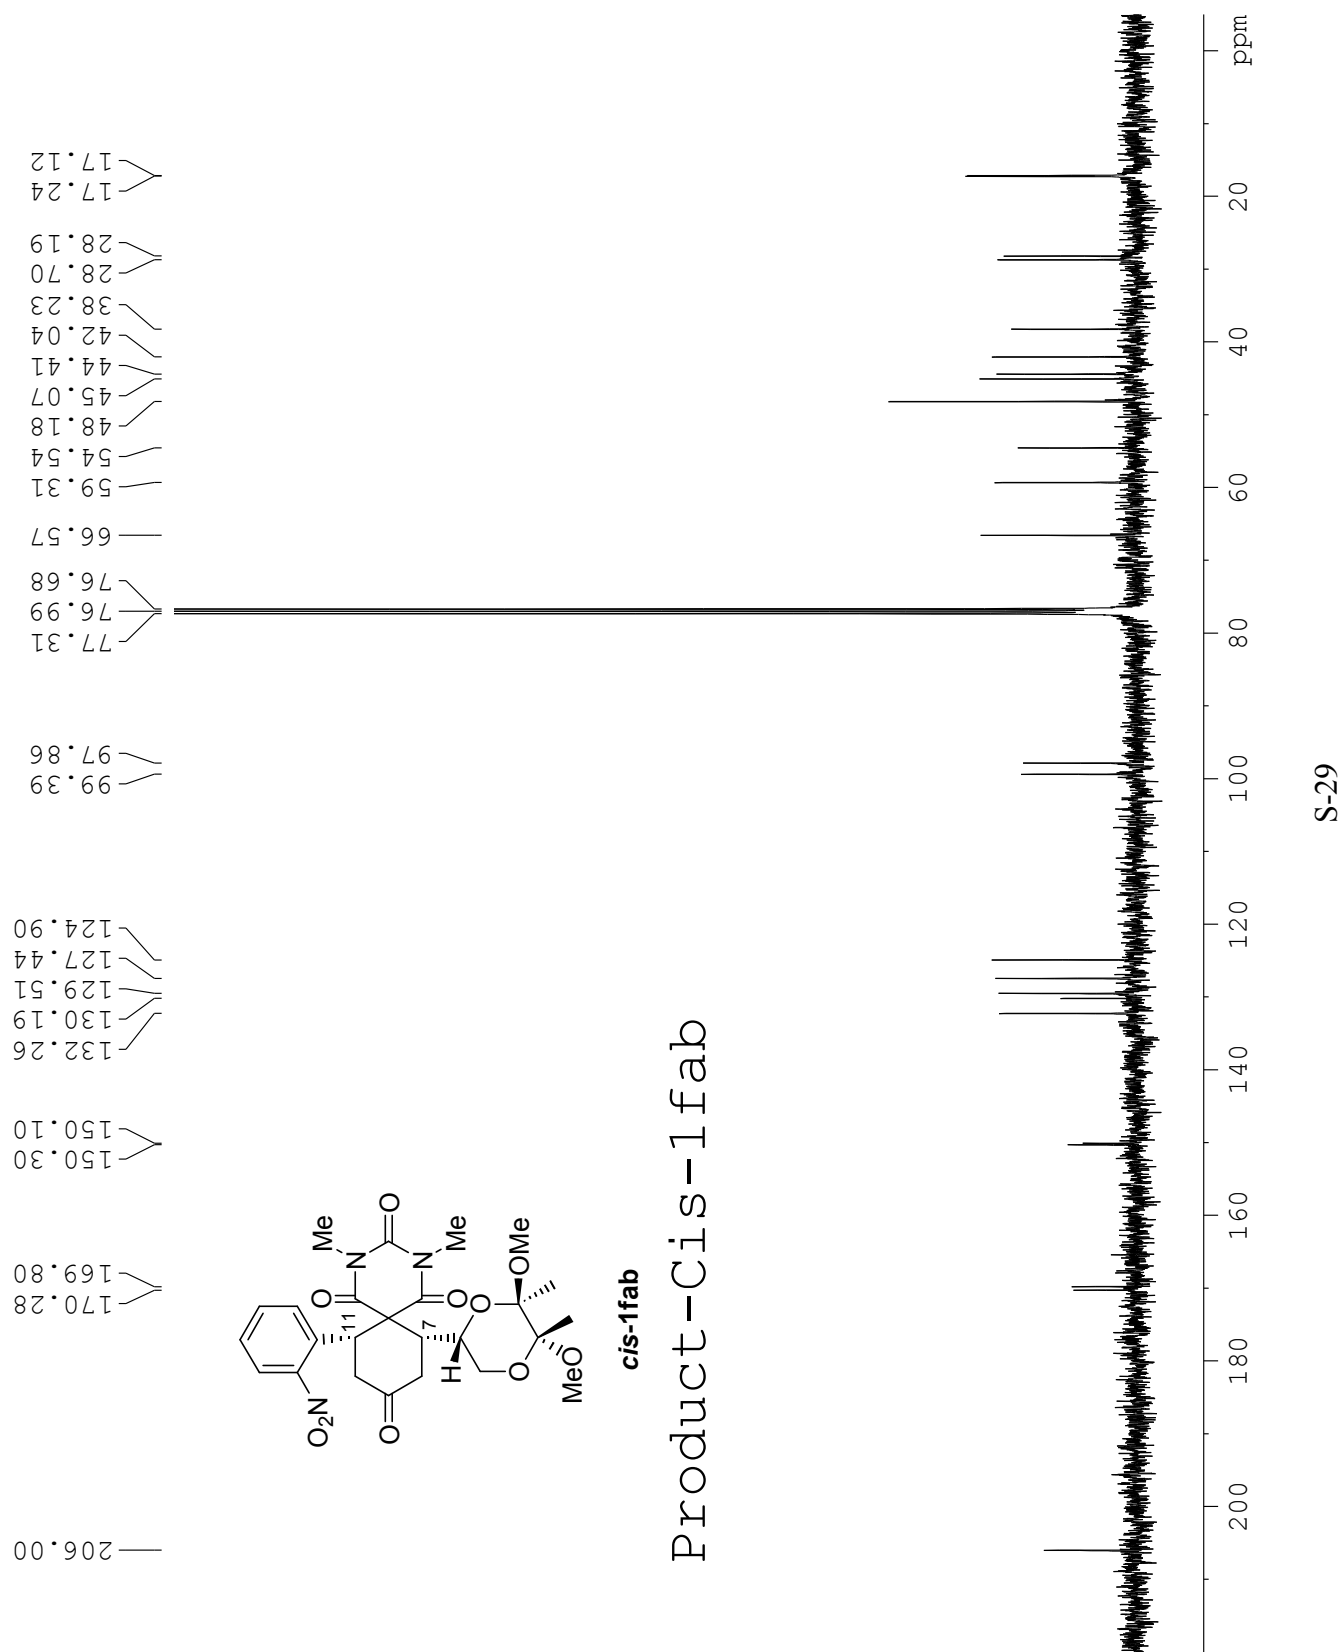

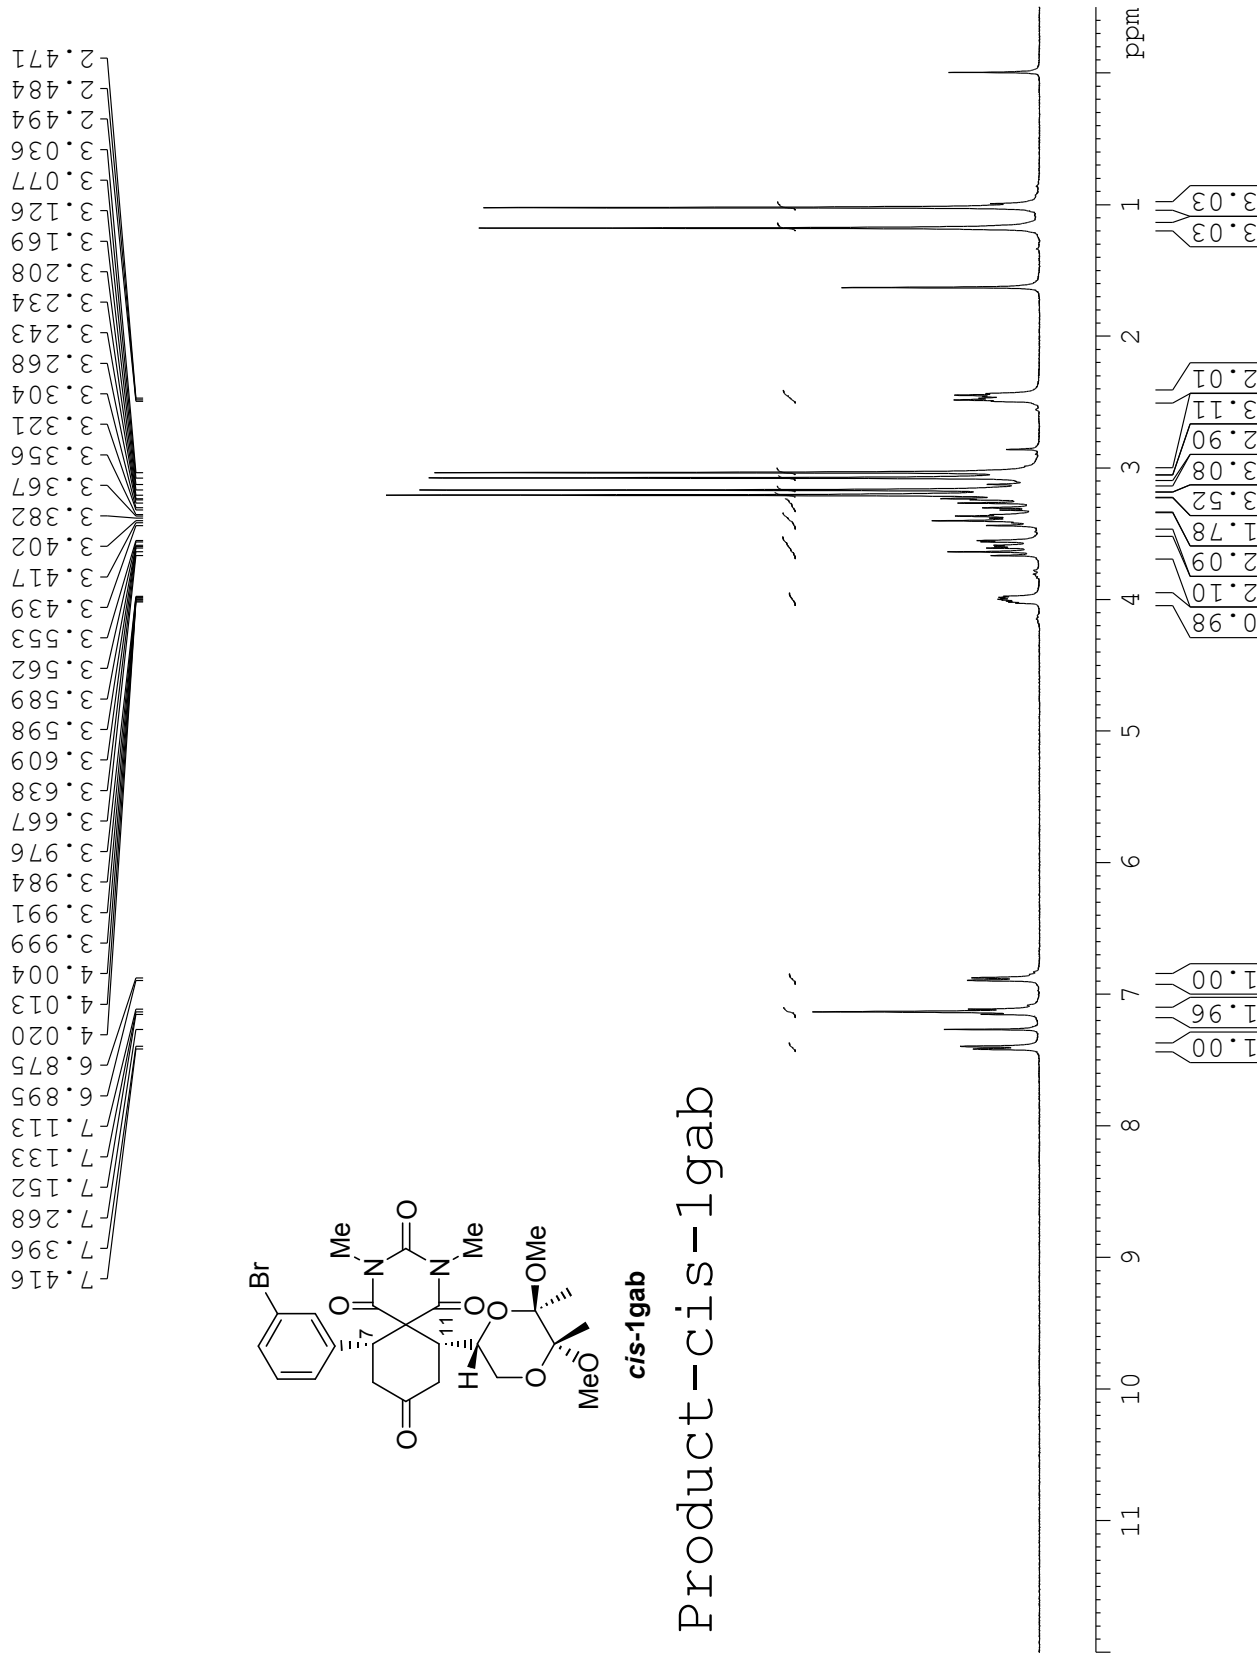

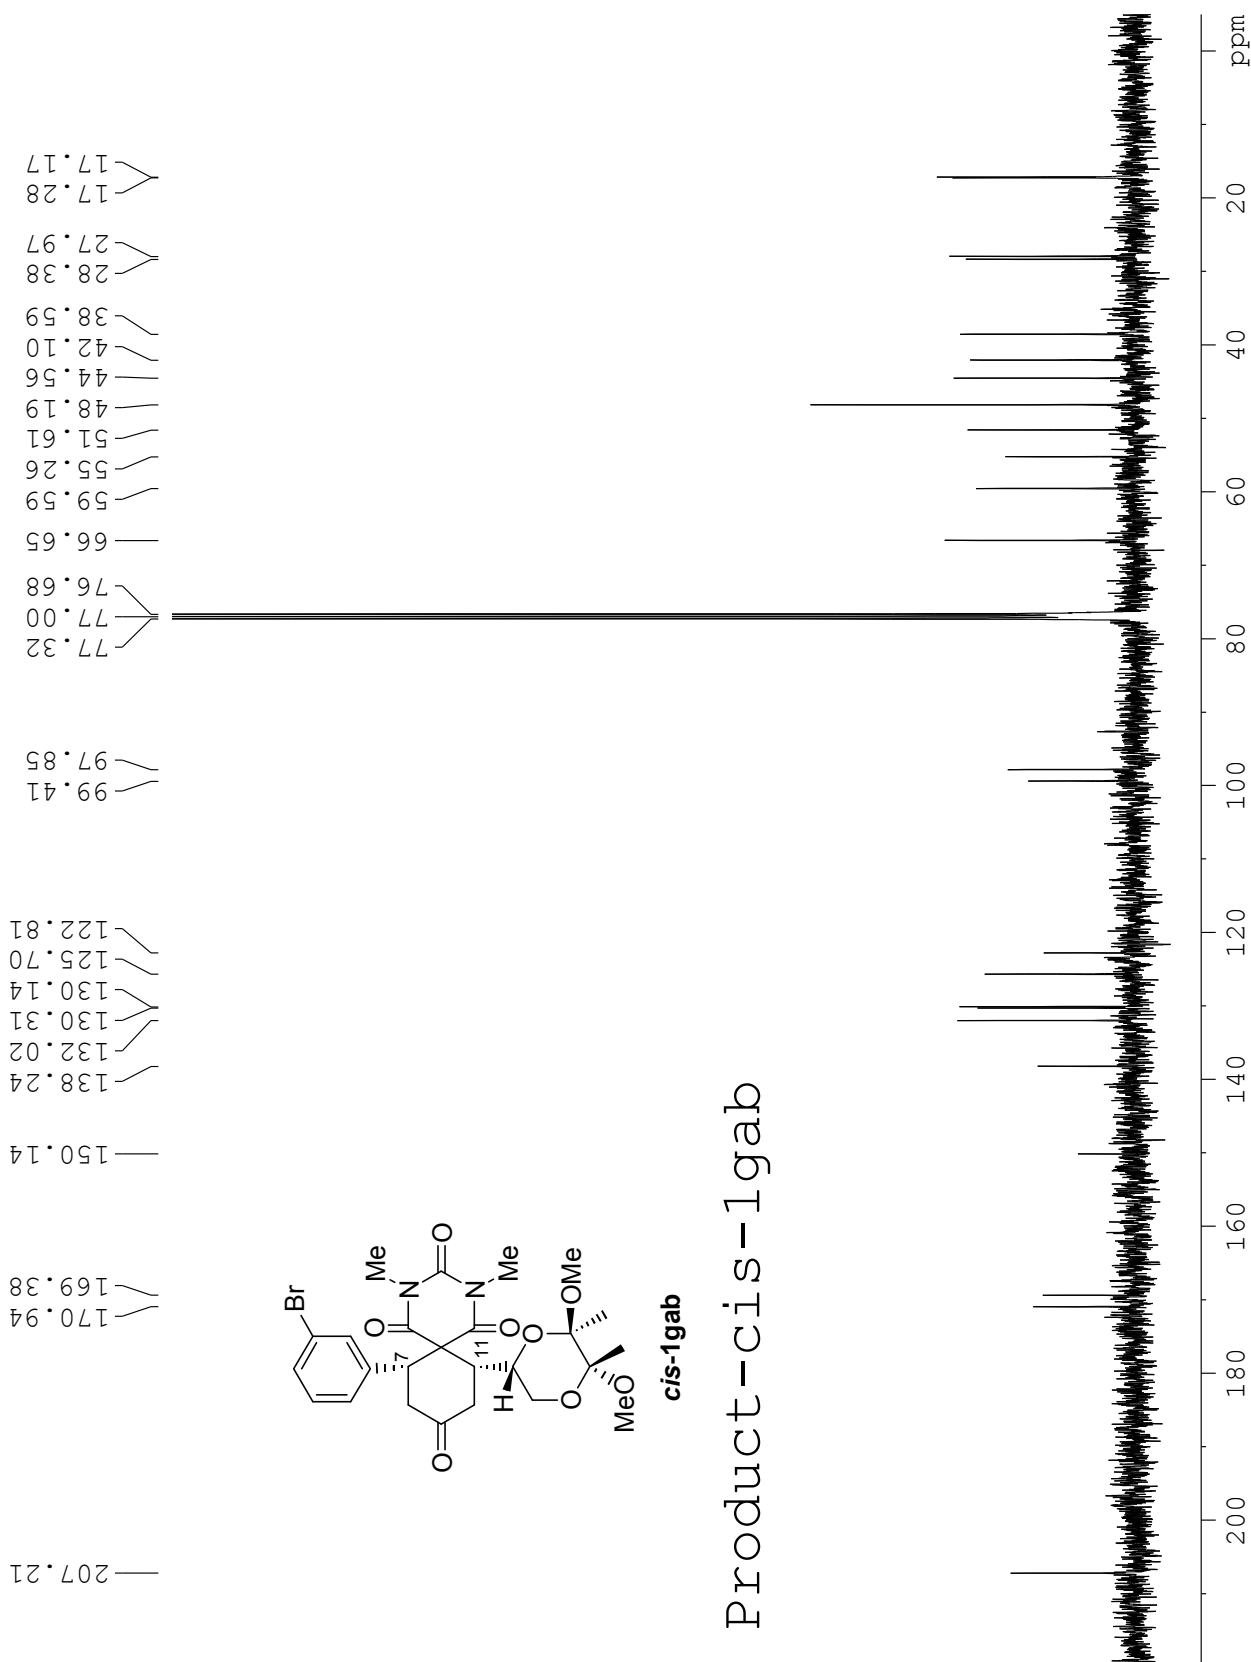

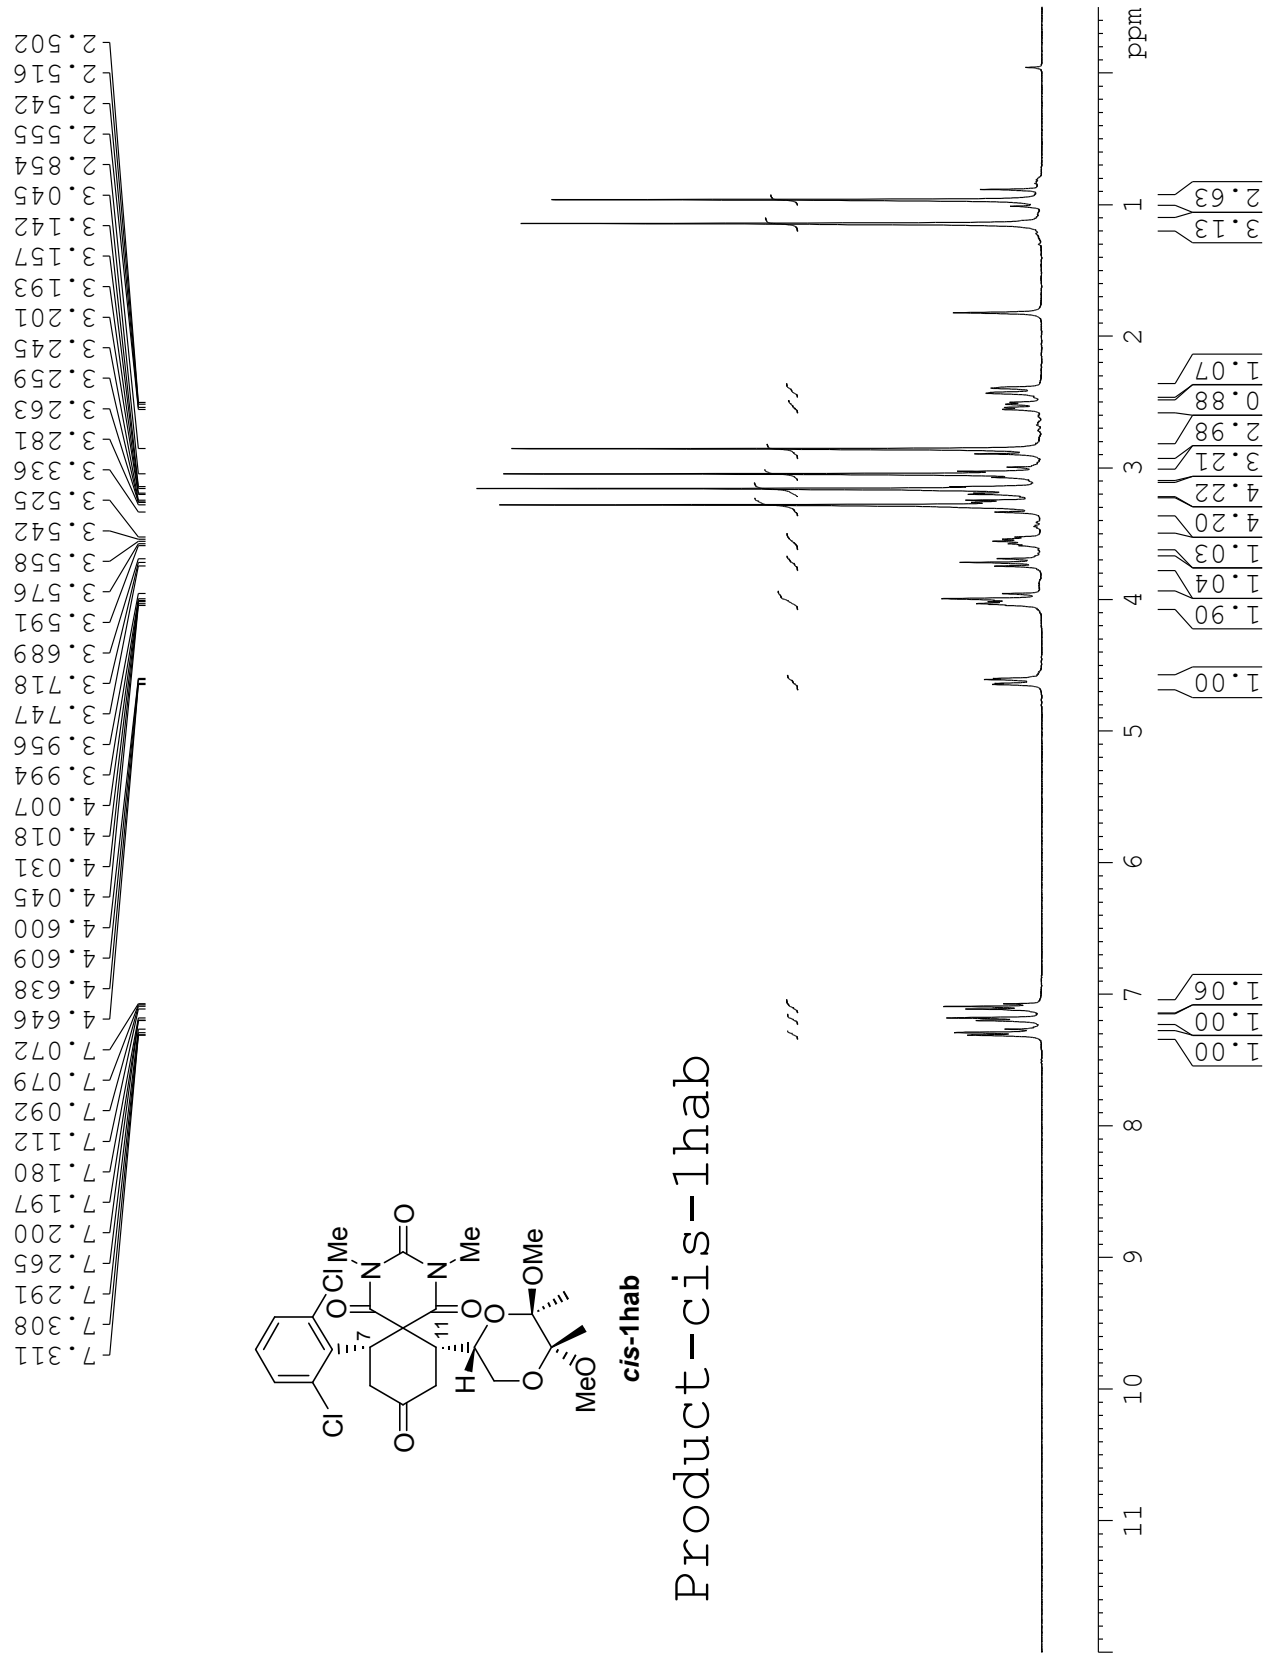



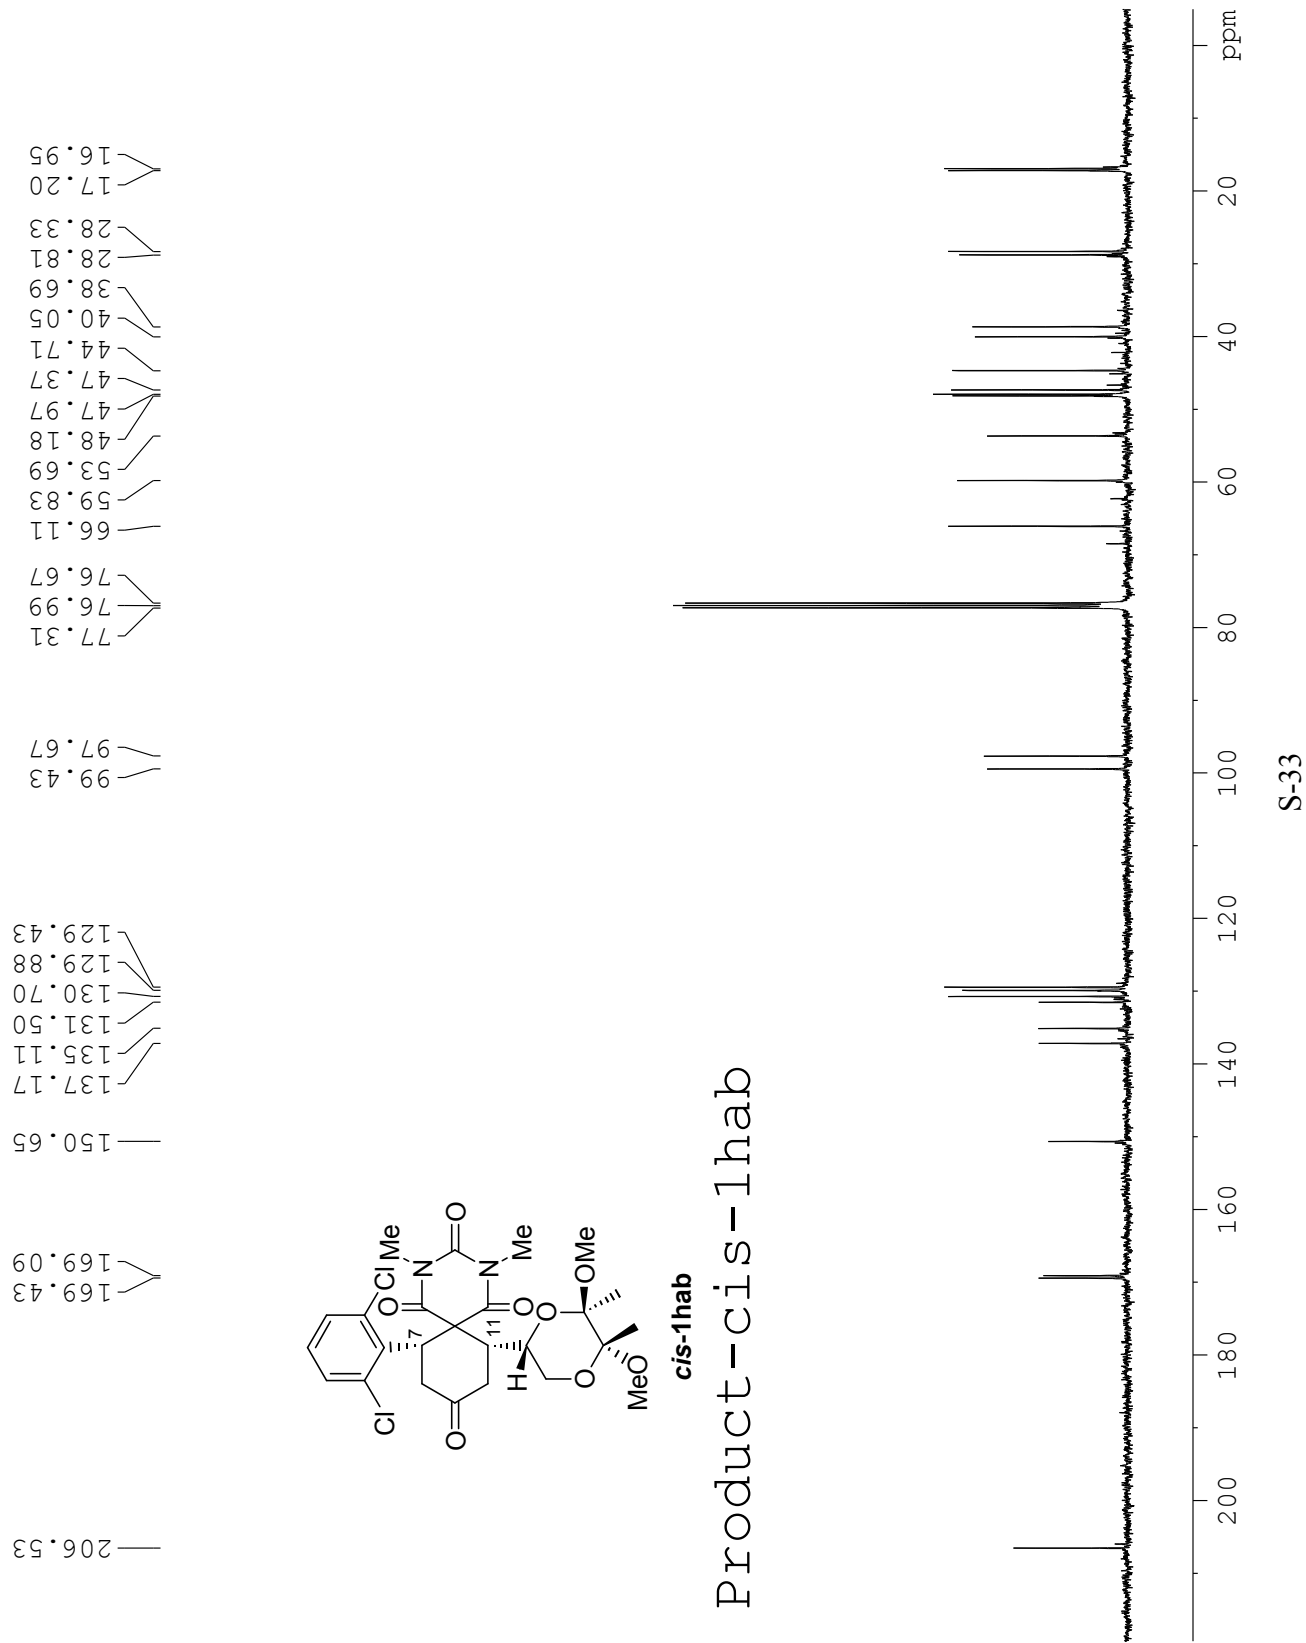

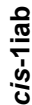

## Product-cis-liab

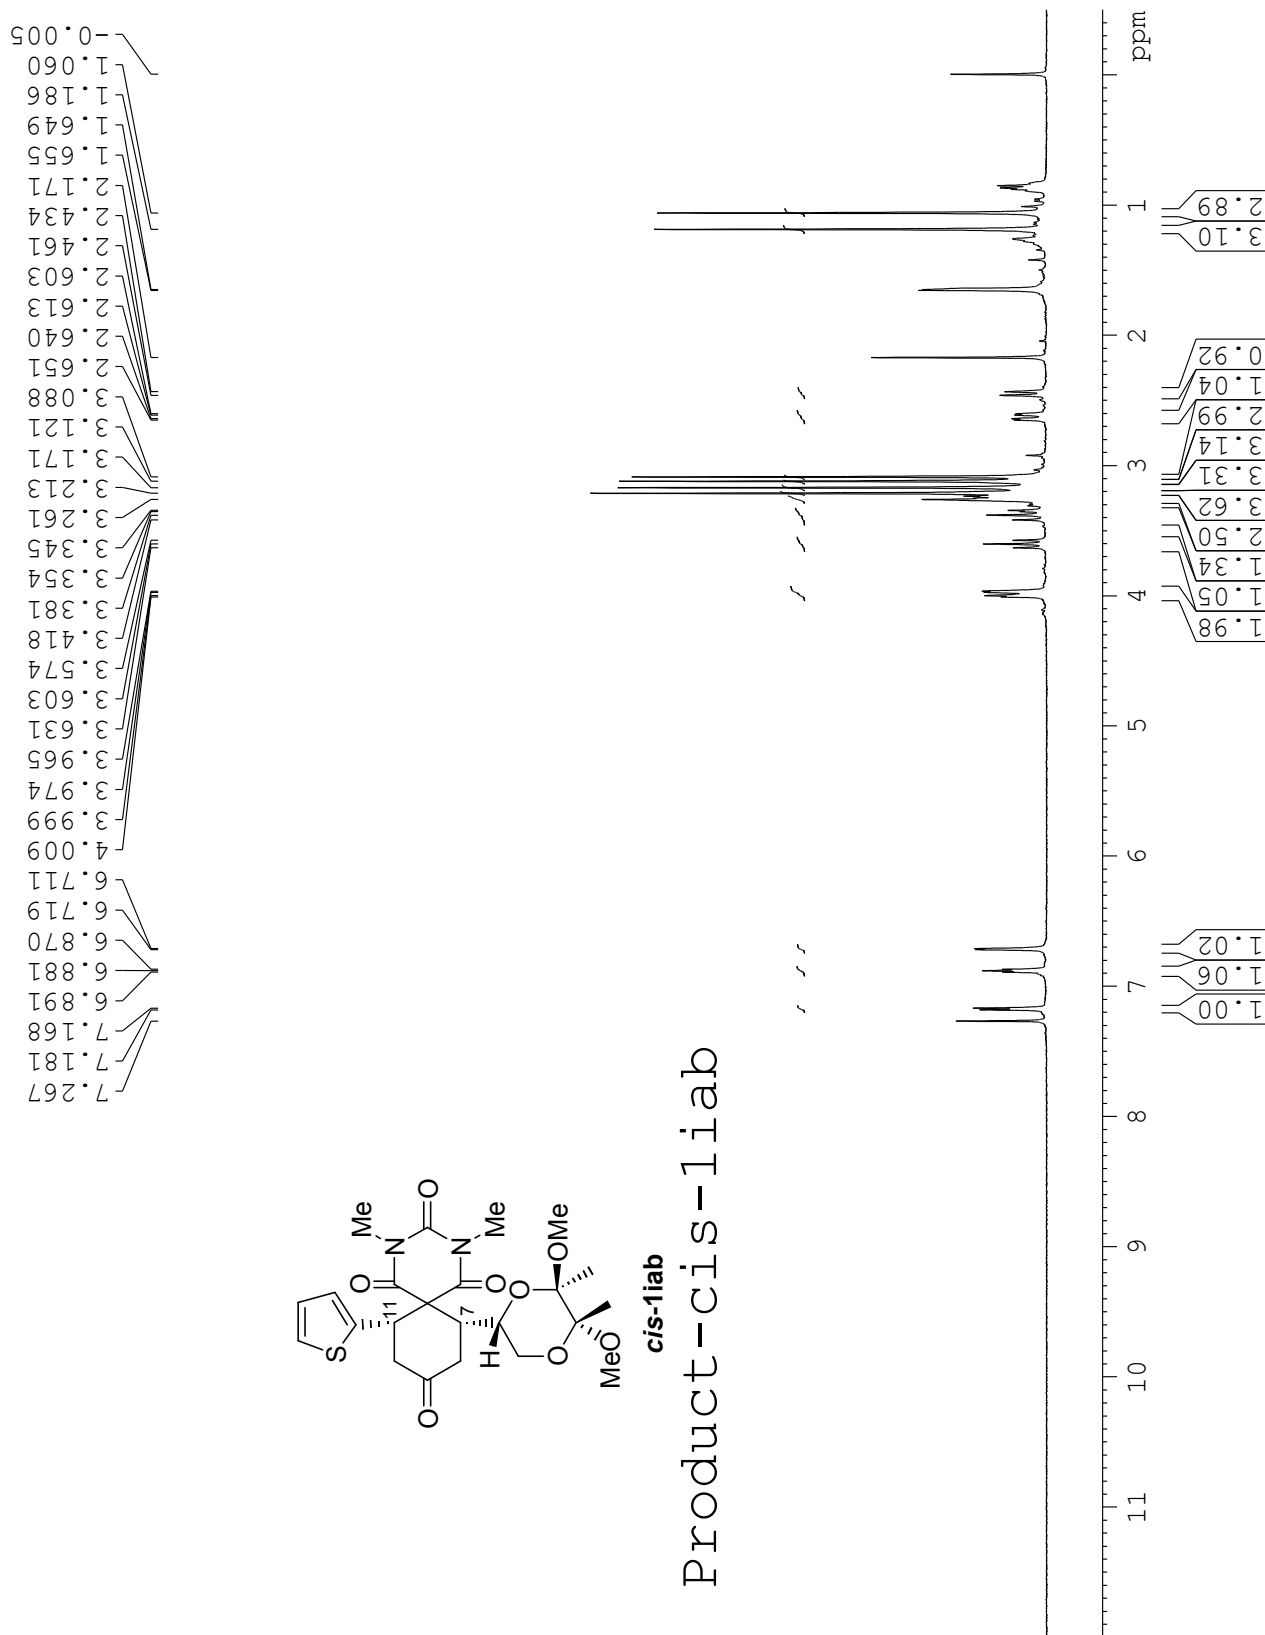

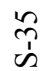

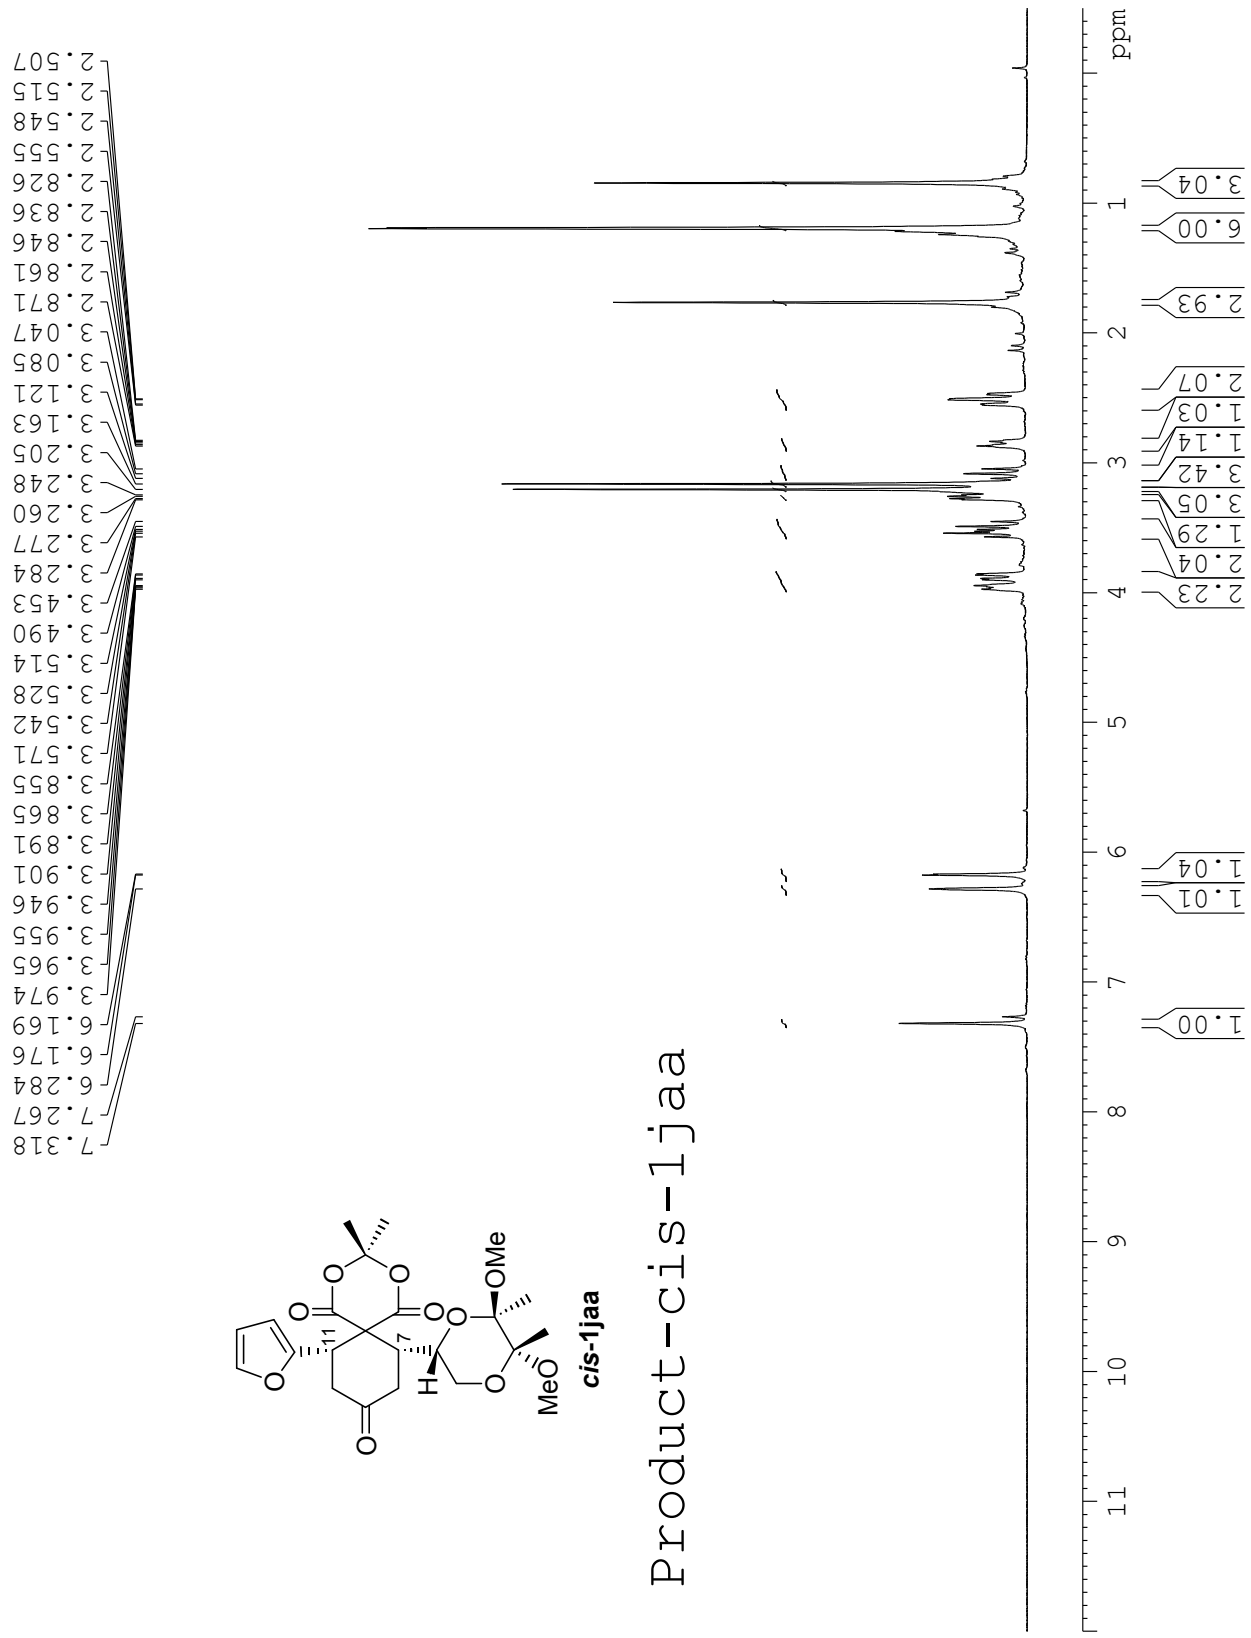

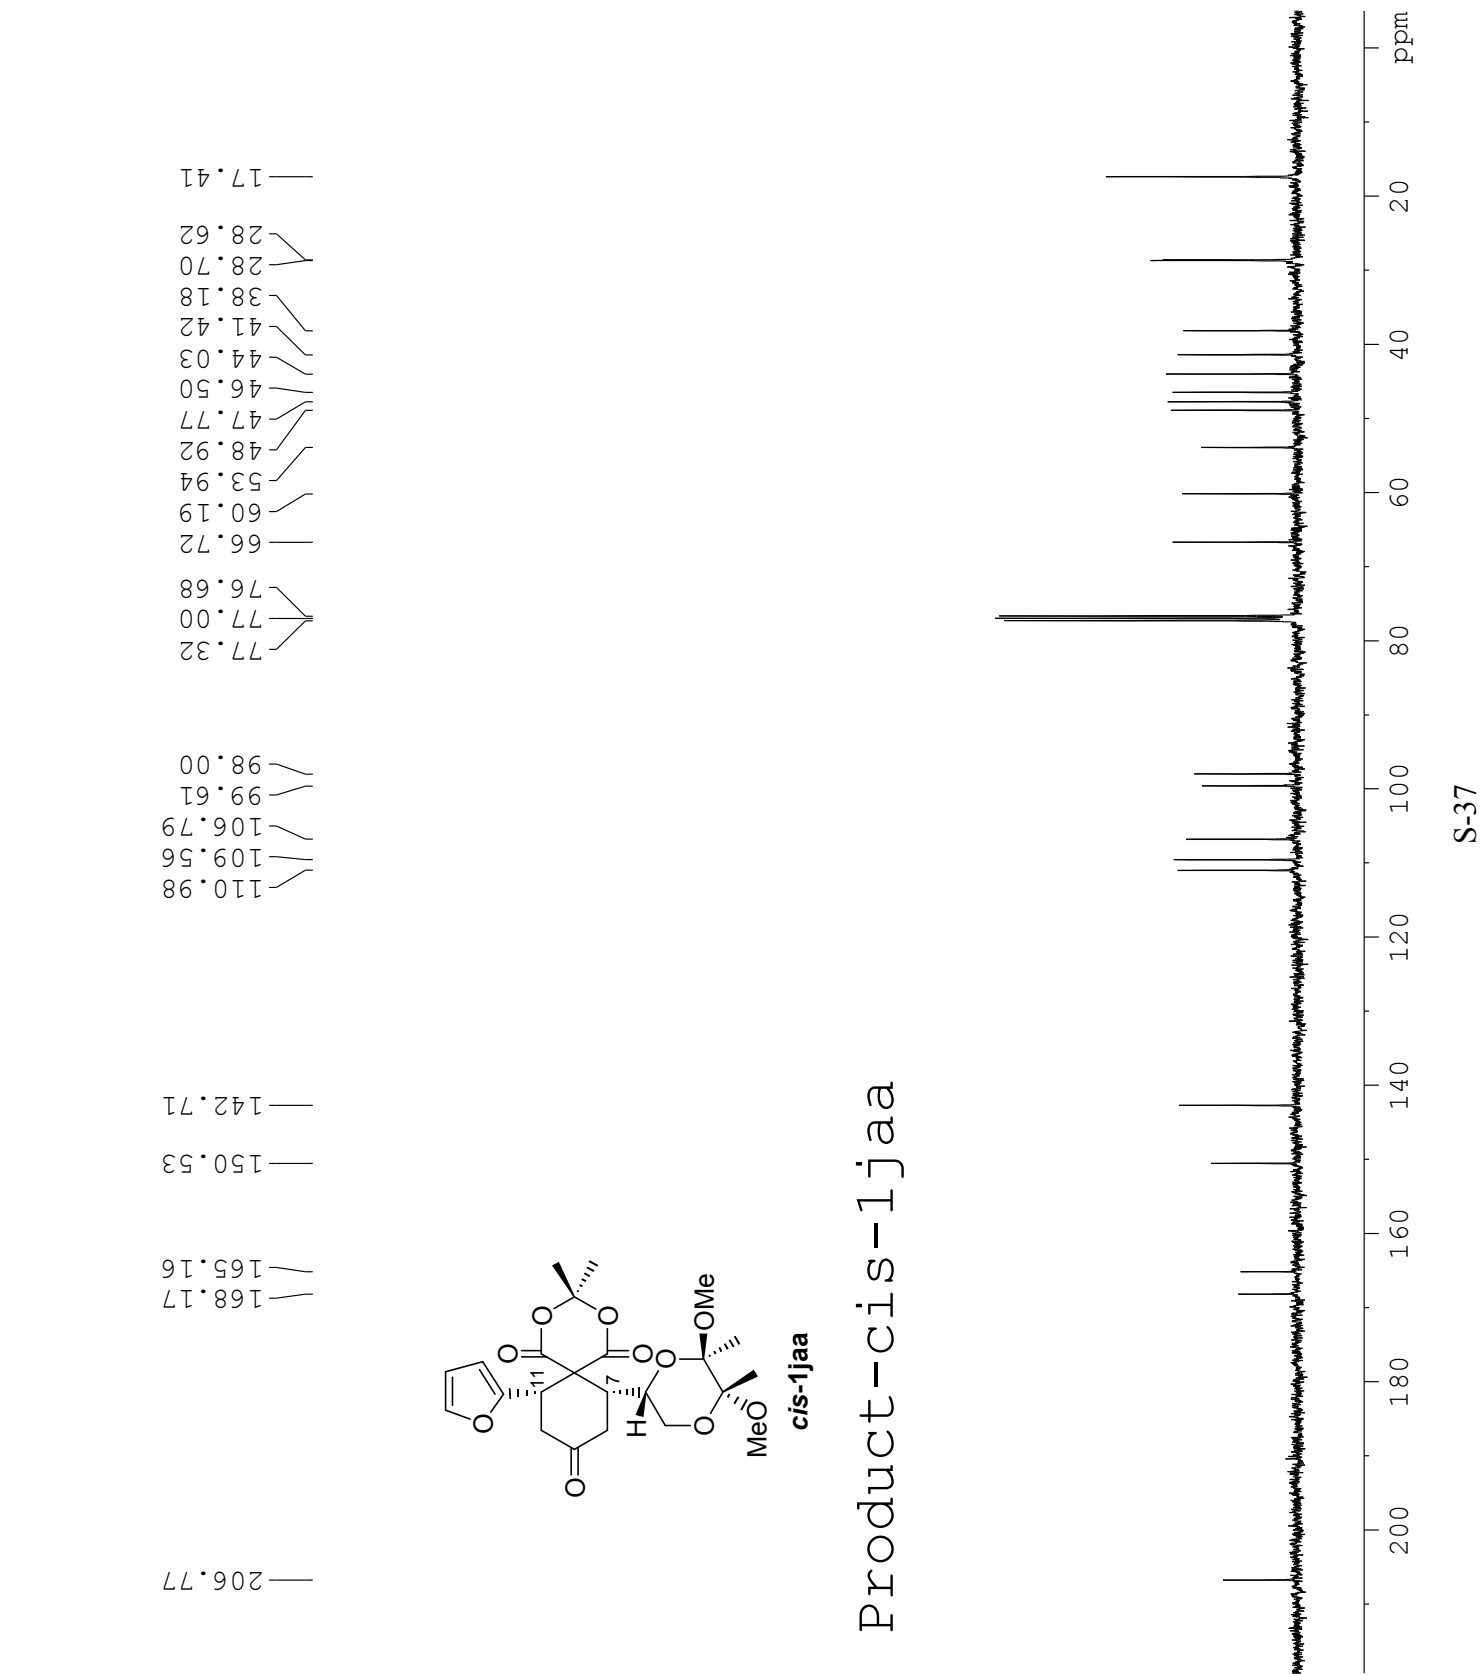

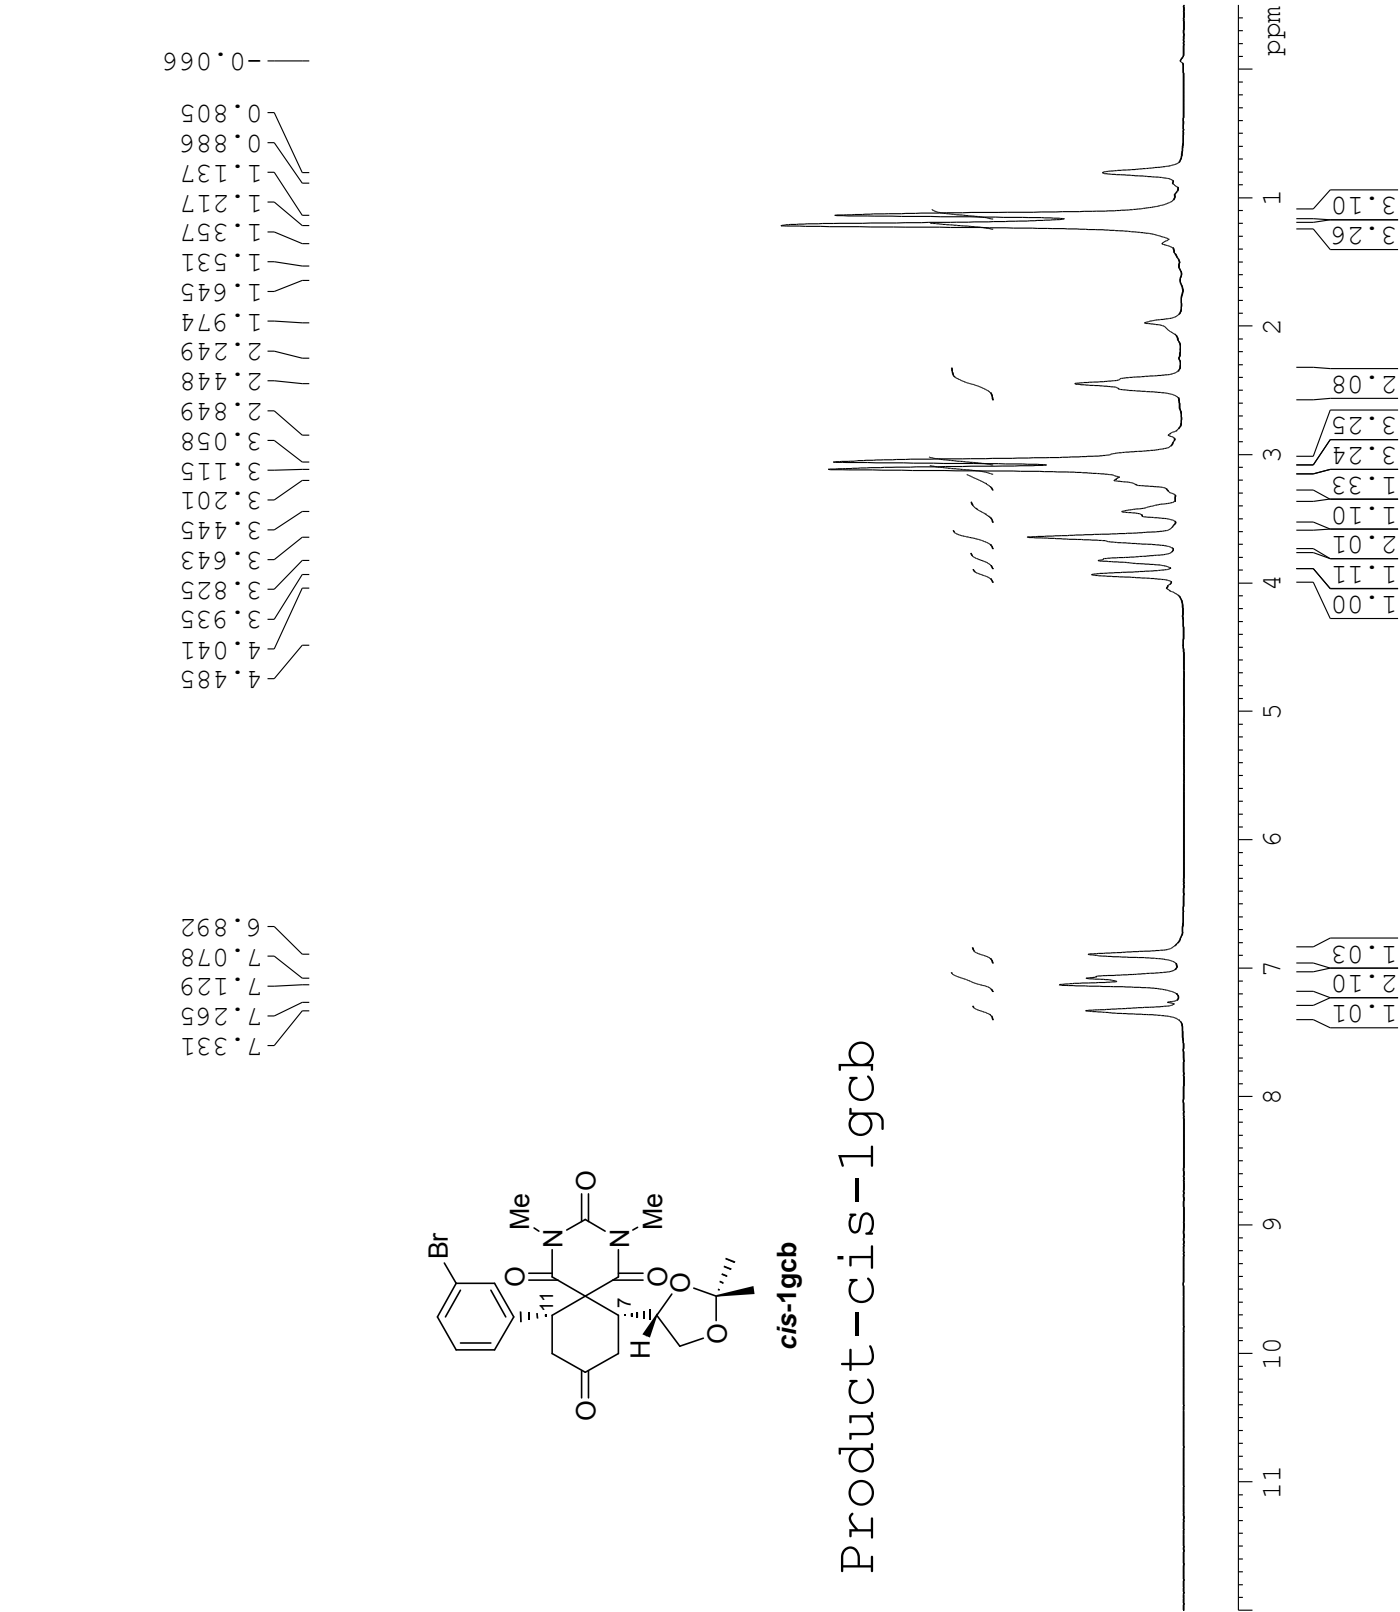

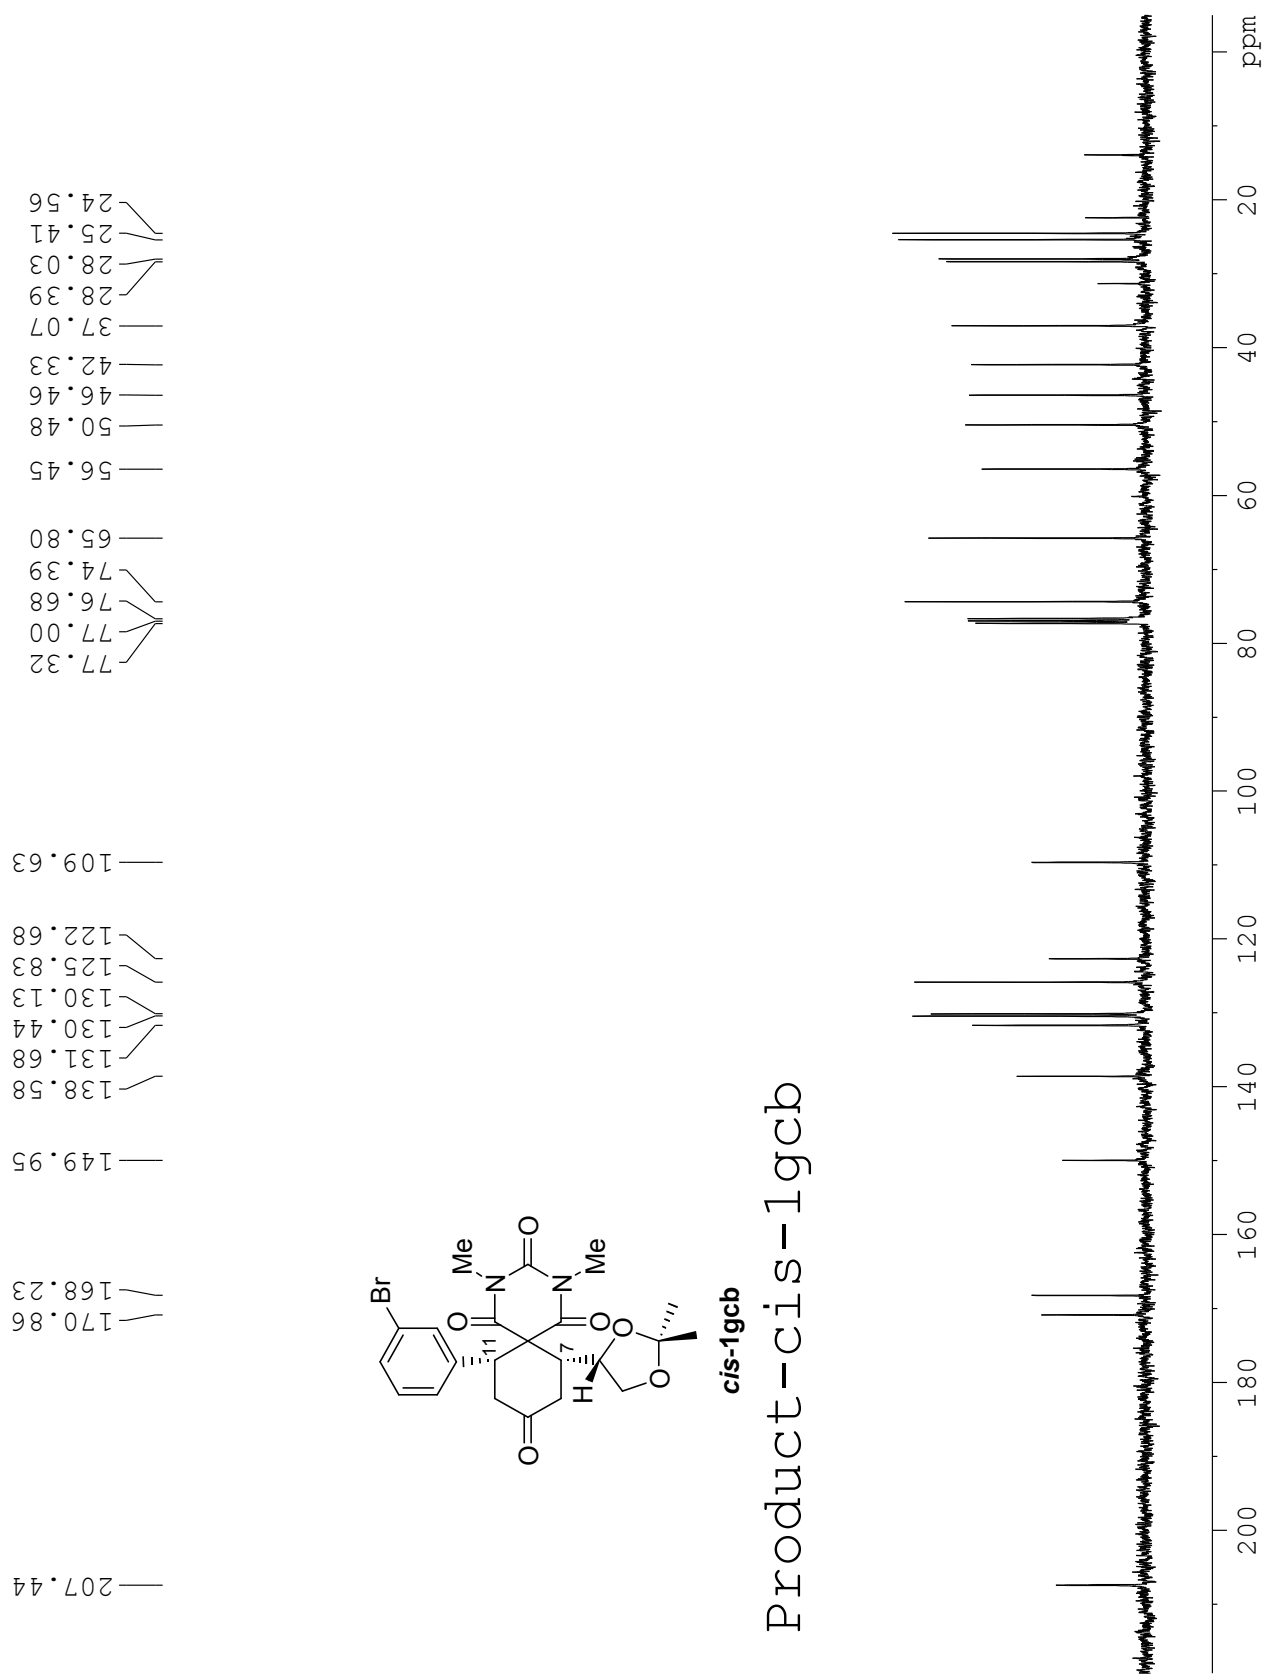

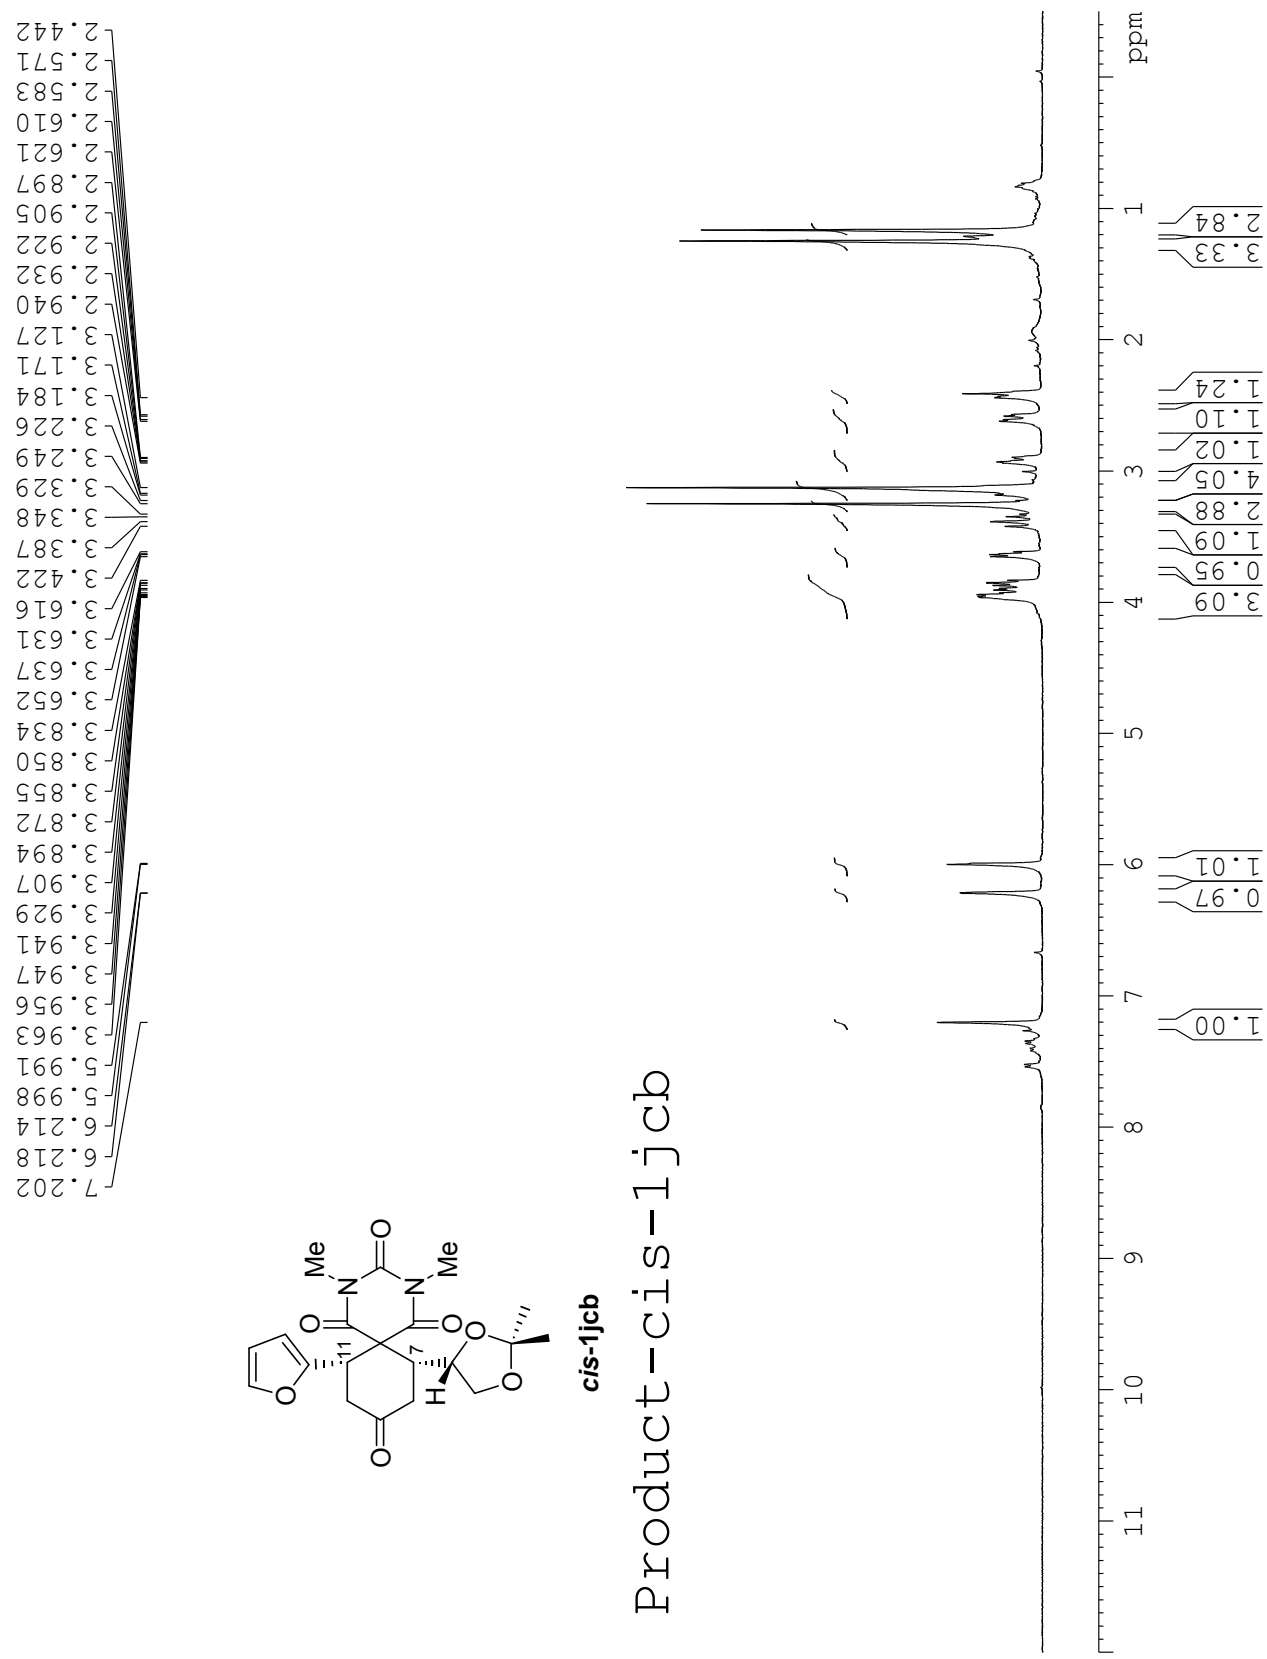



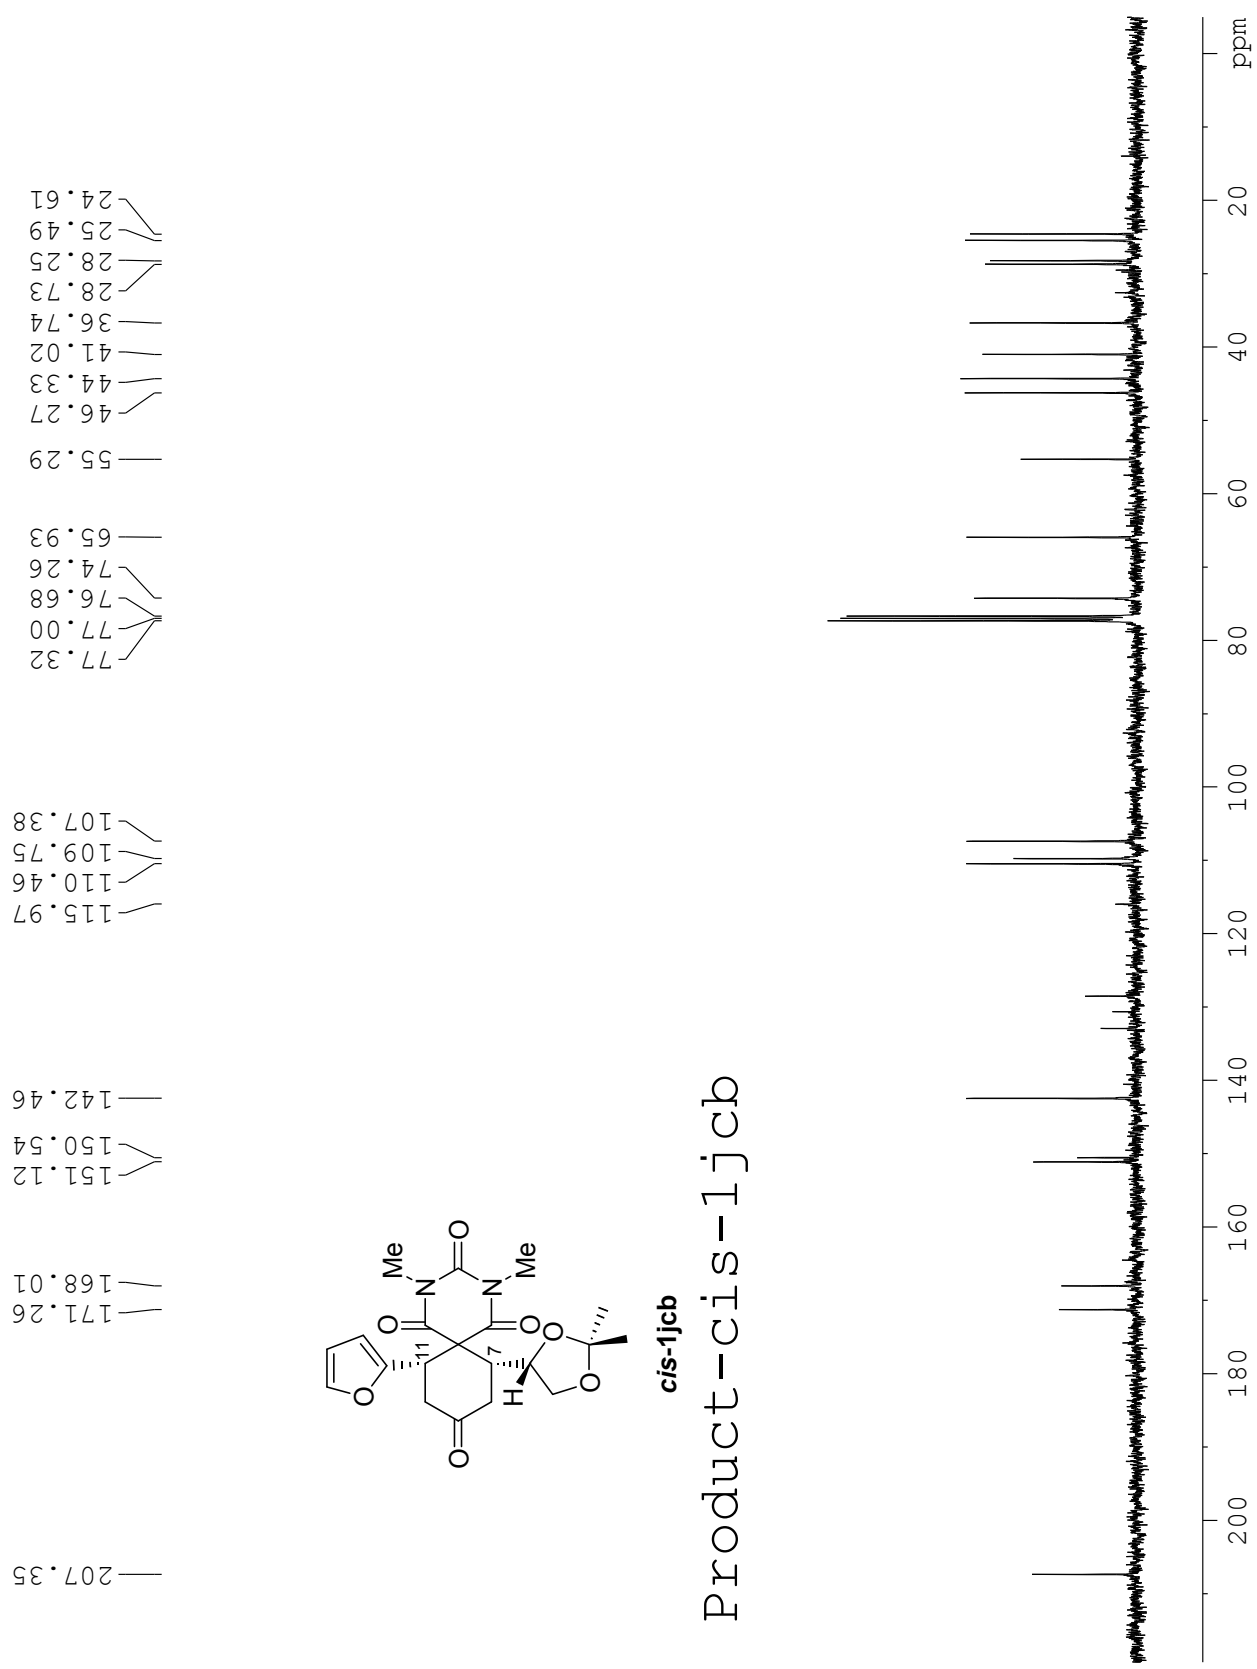

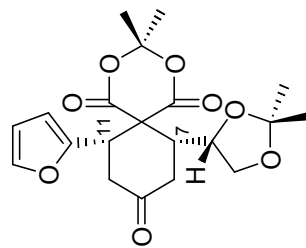

*cis-1jca*

Product-*cis-1jca*

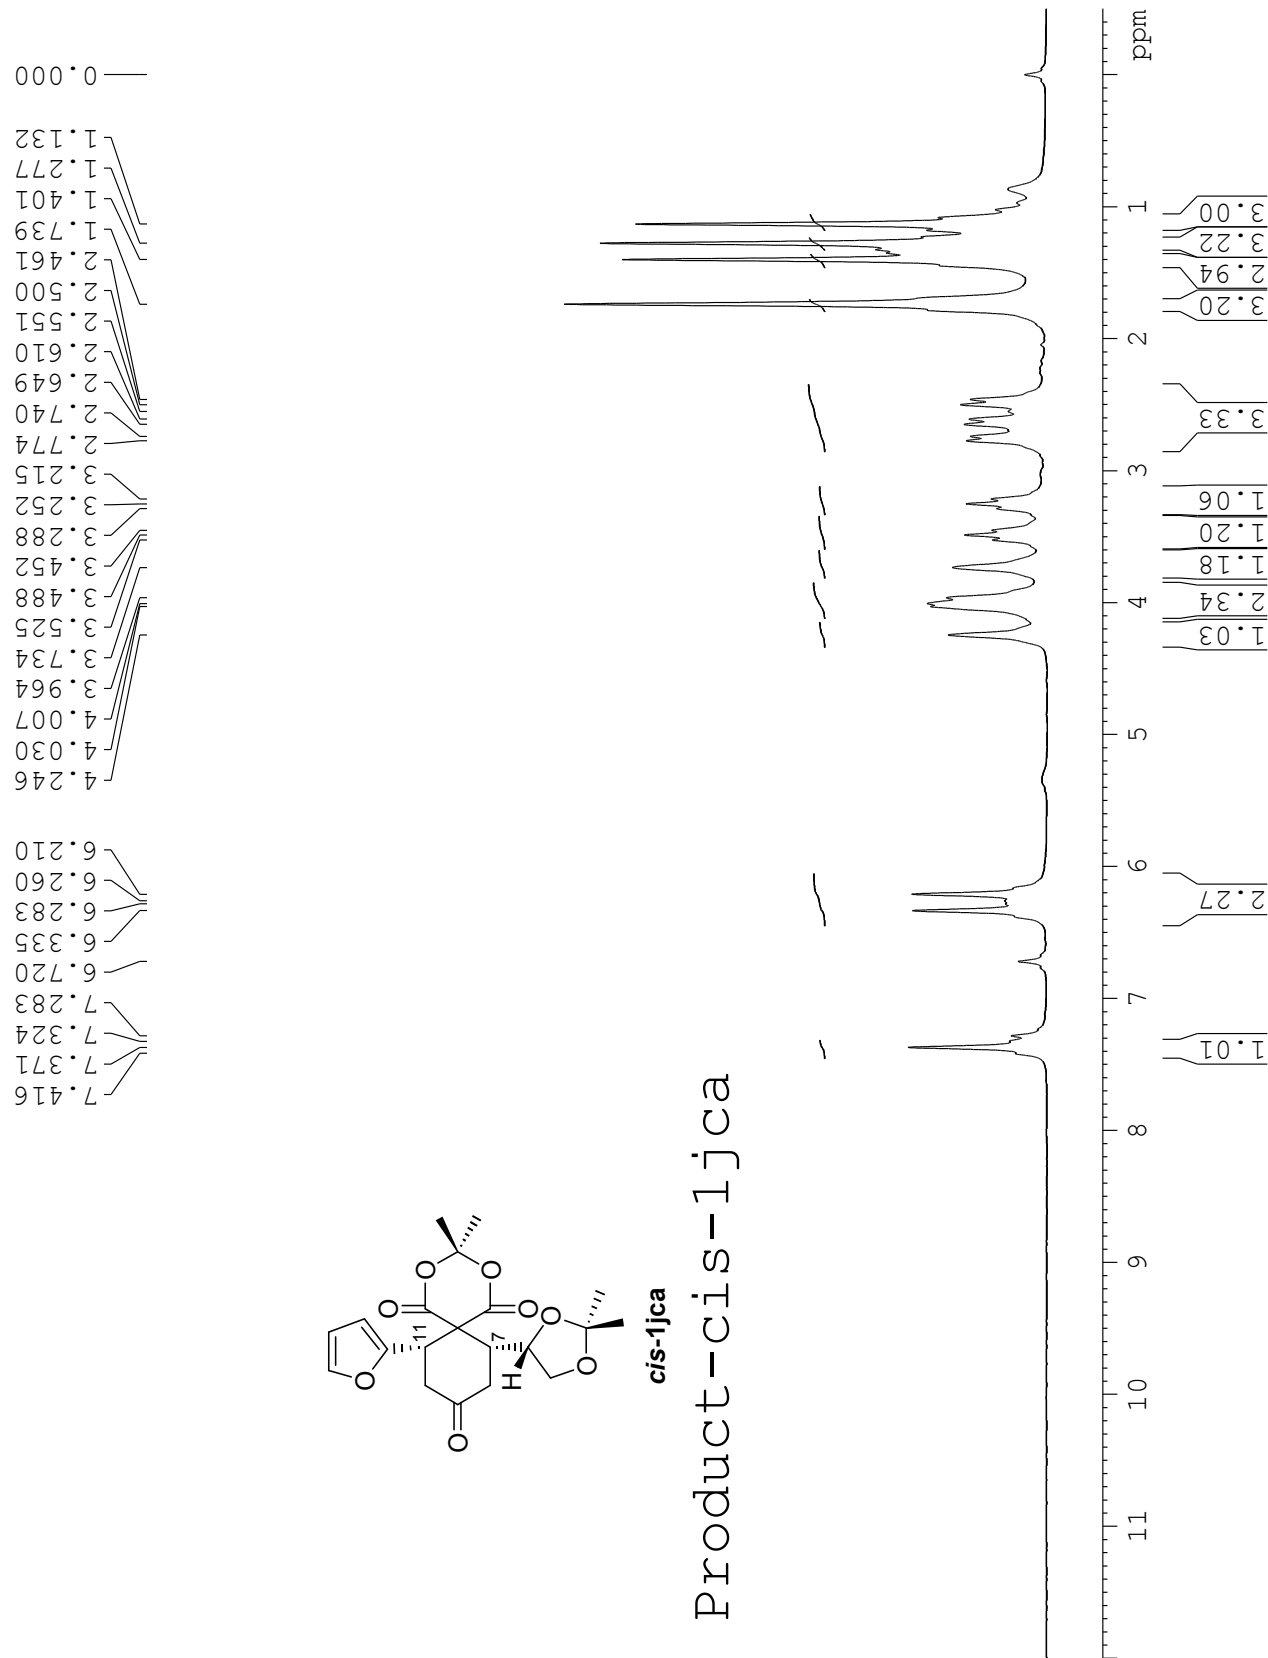

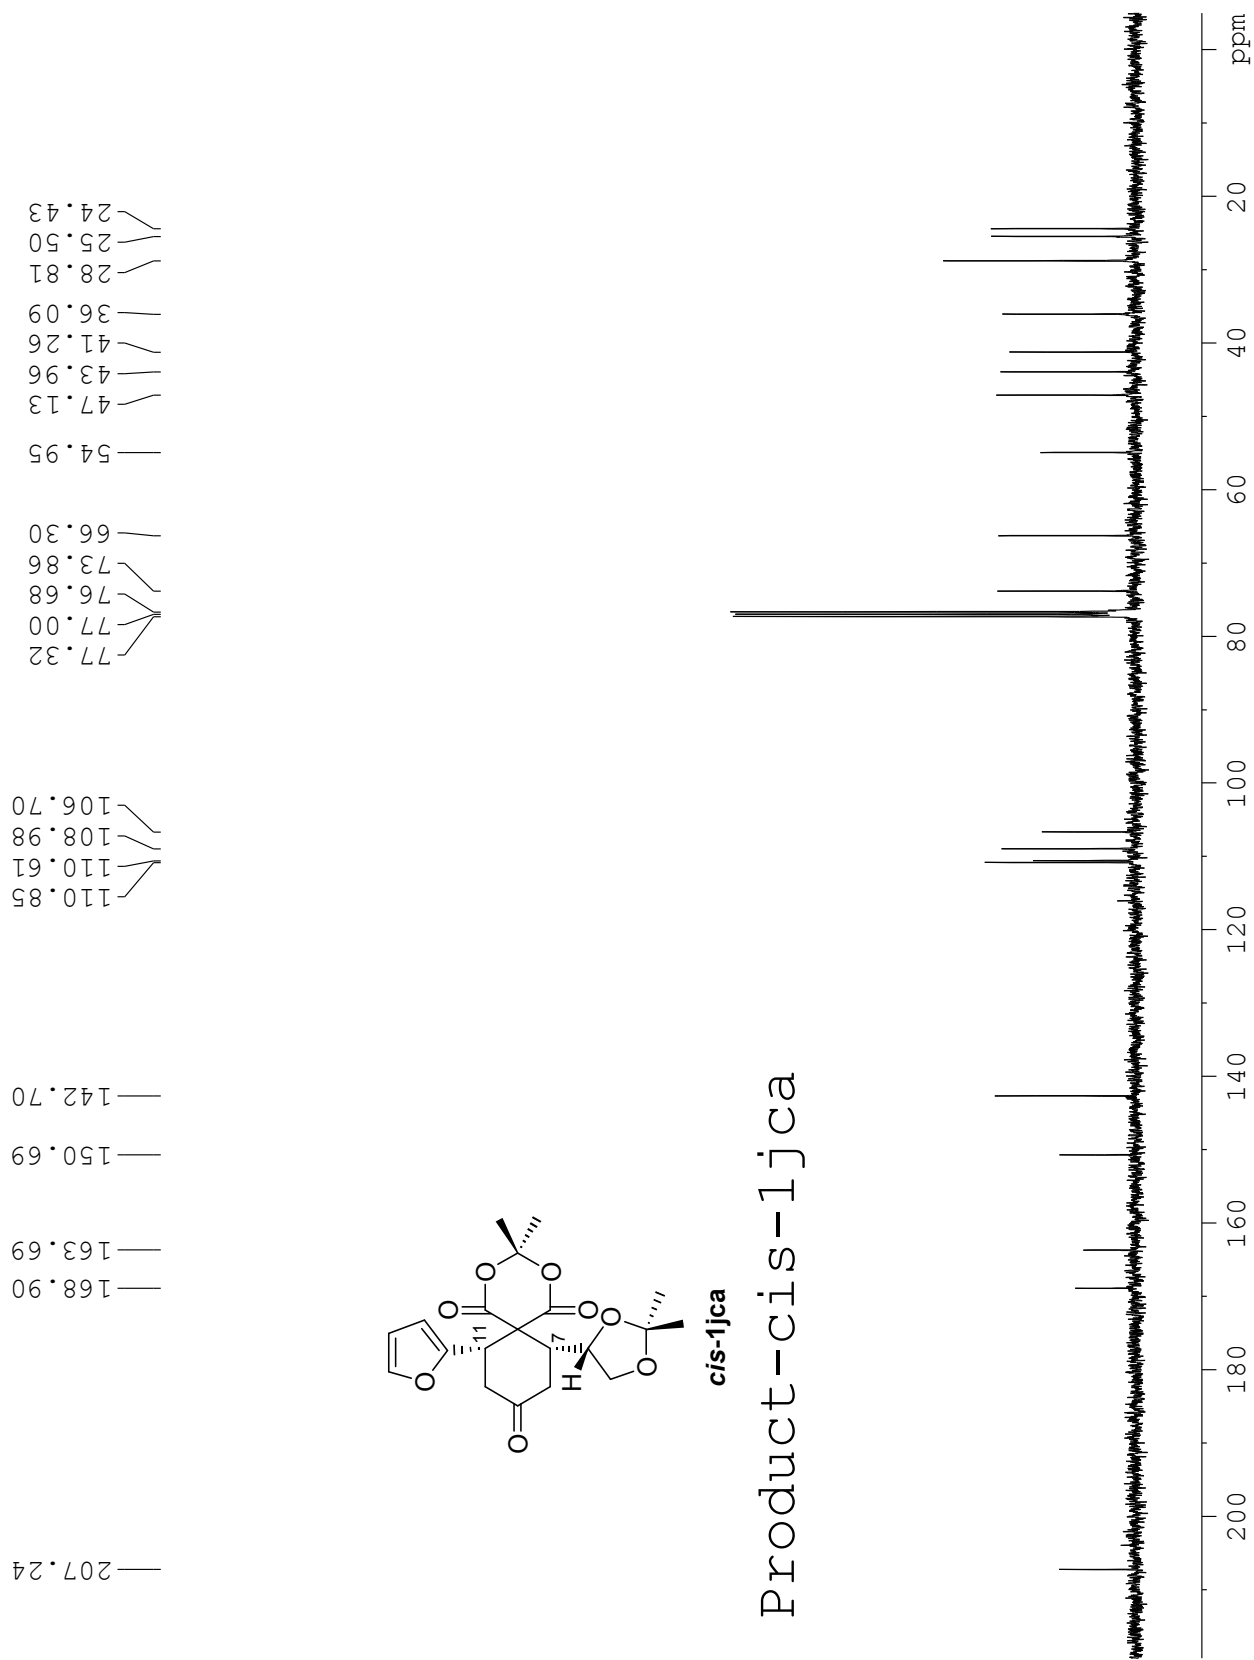

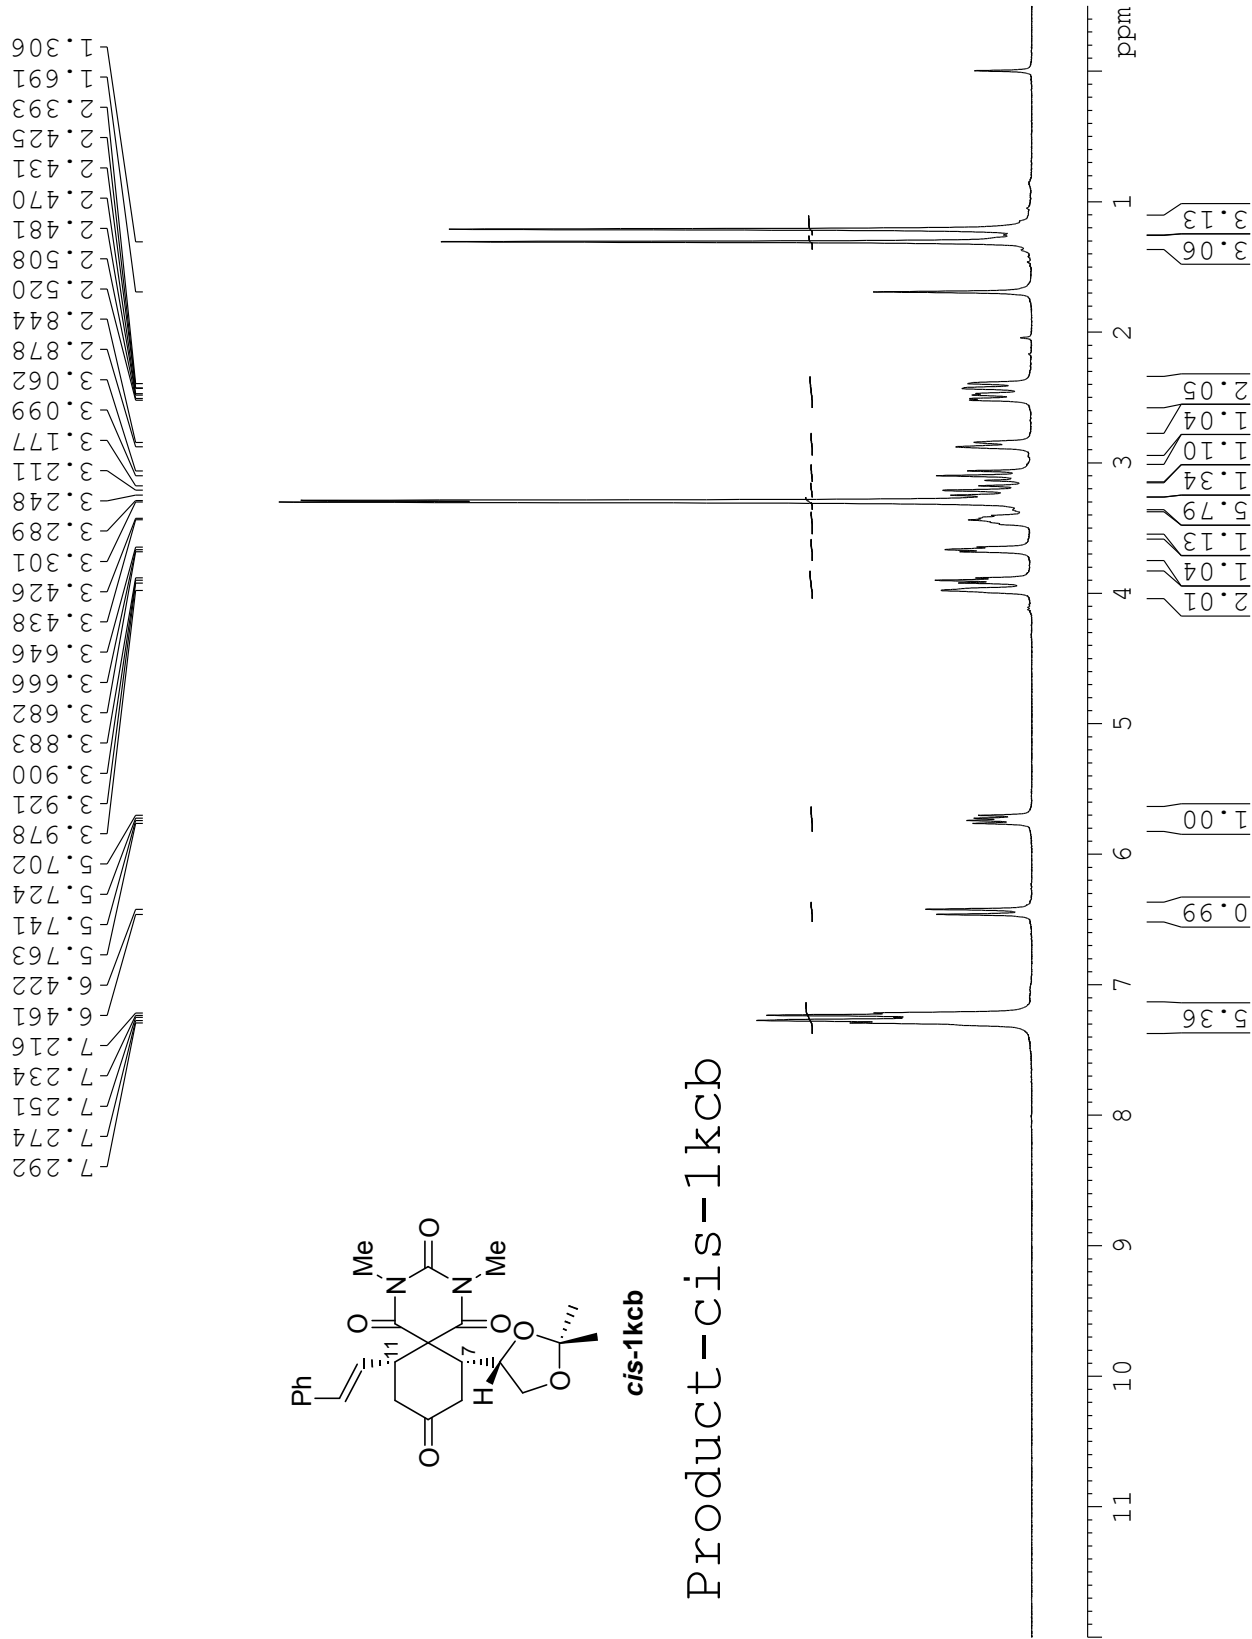

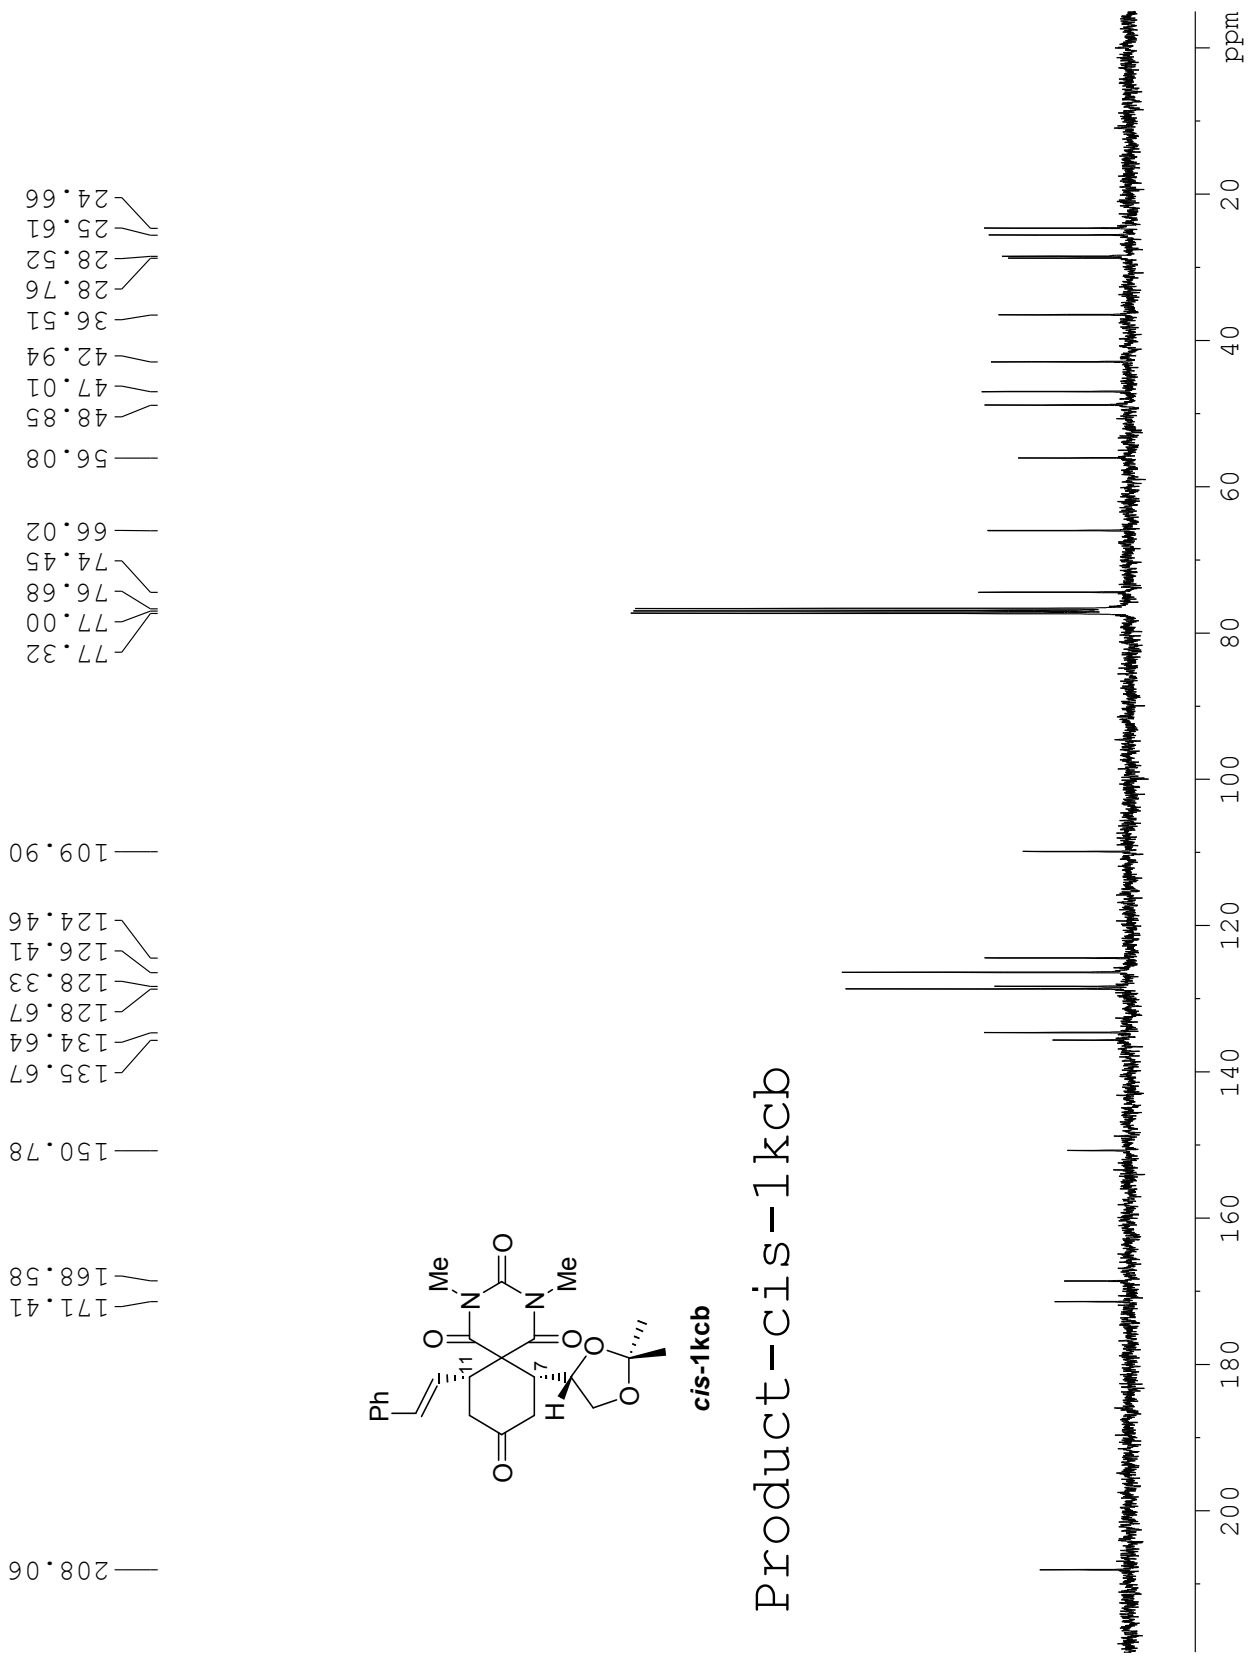

Product-*cis*-1kcb

*cis*-1kcb

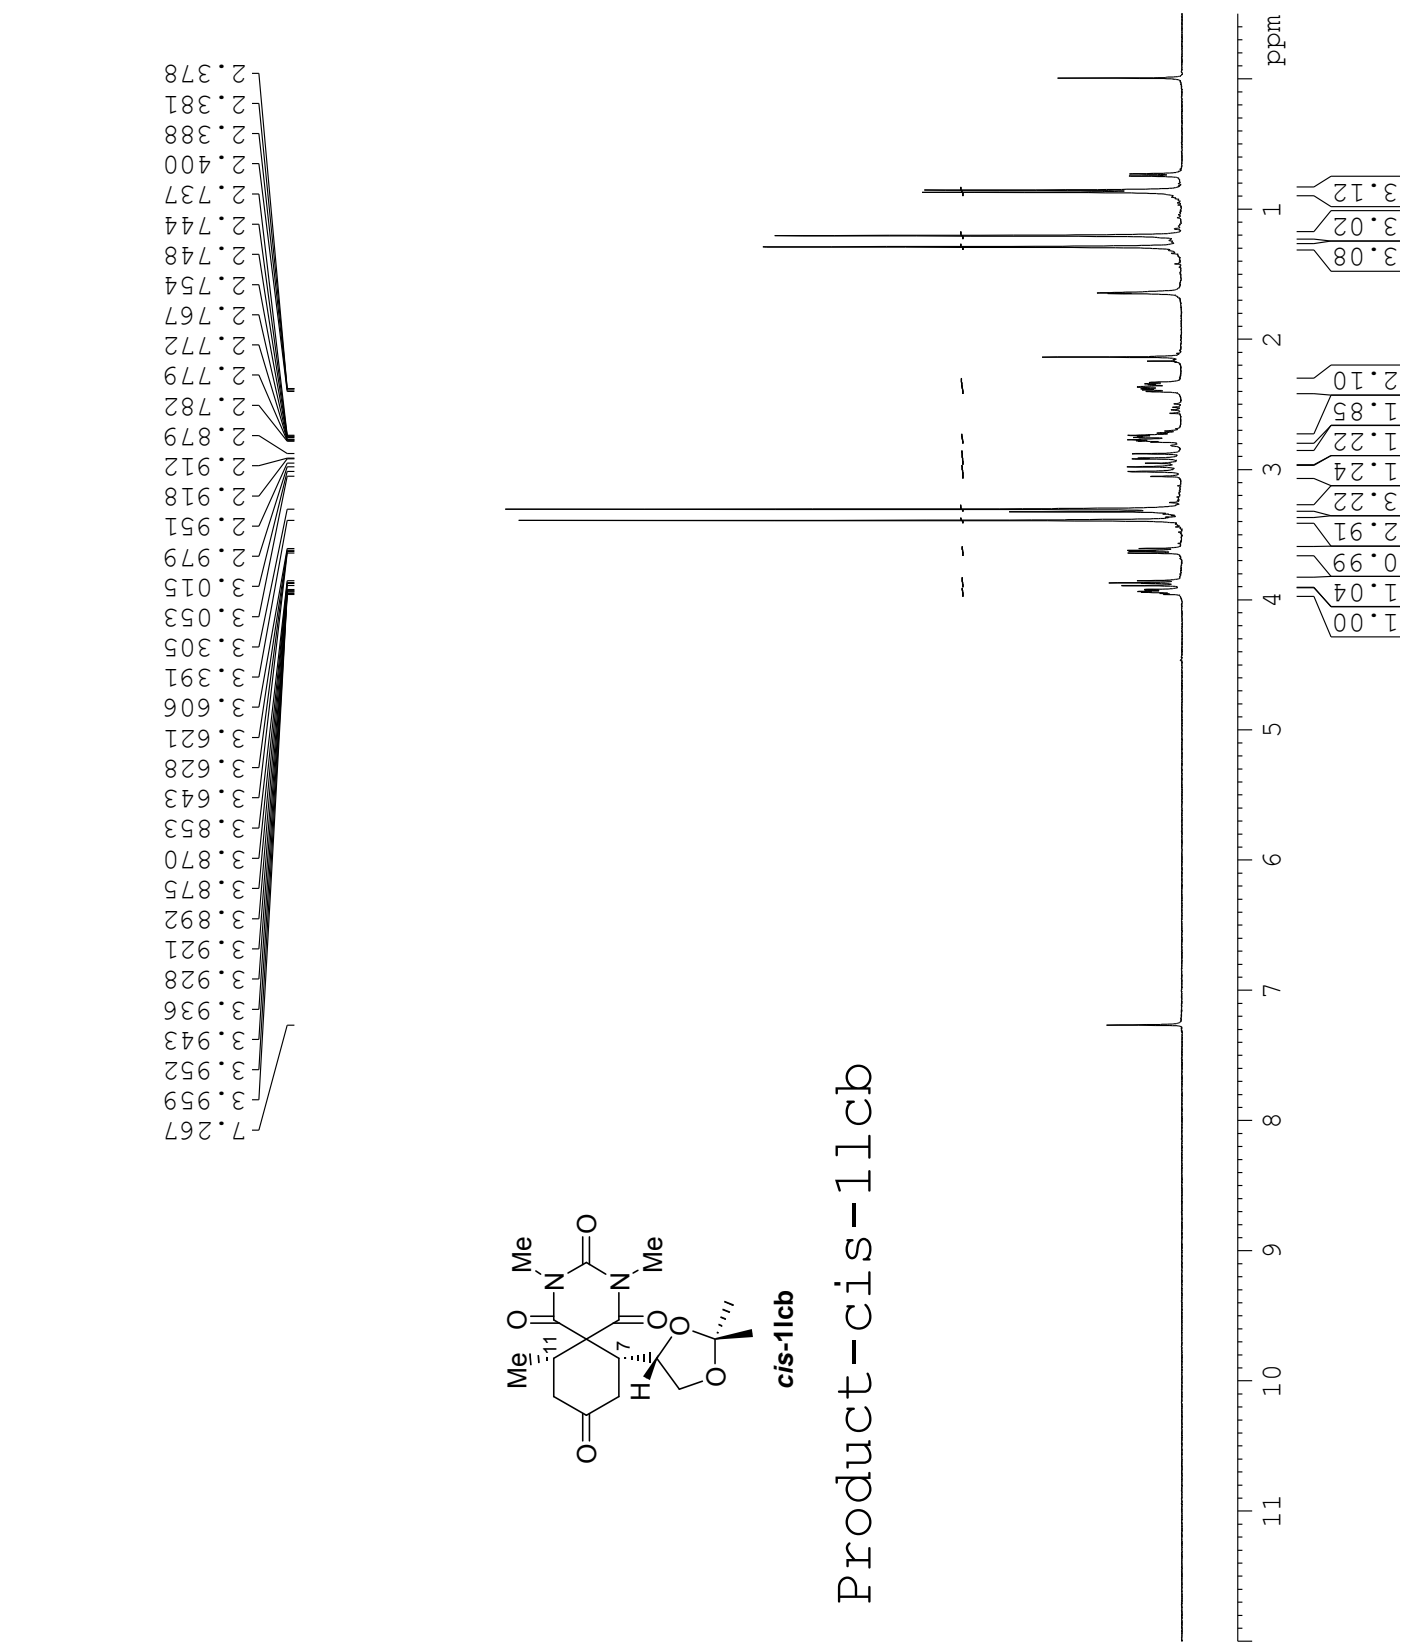

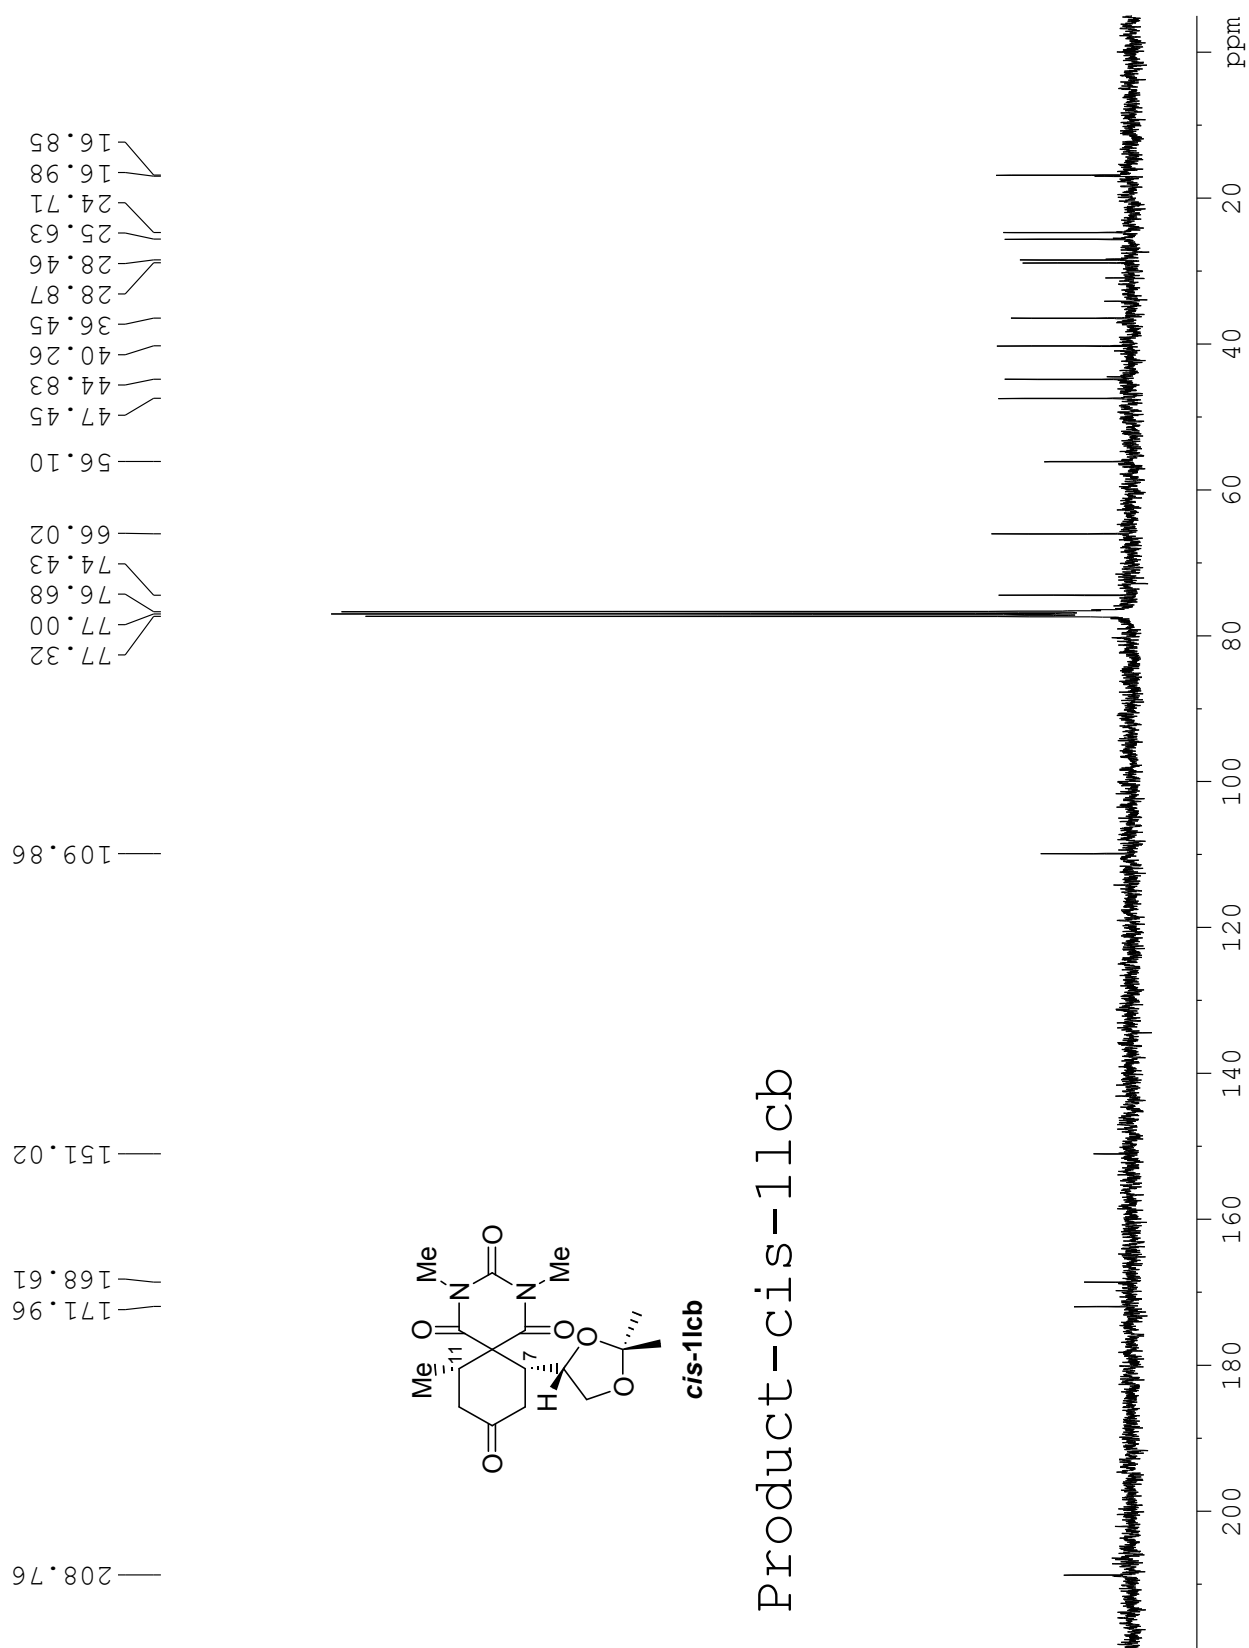

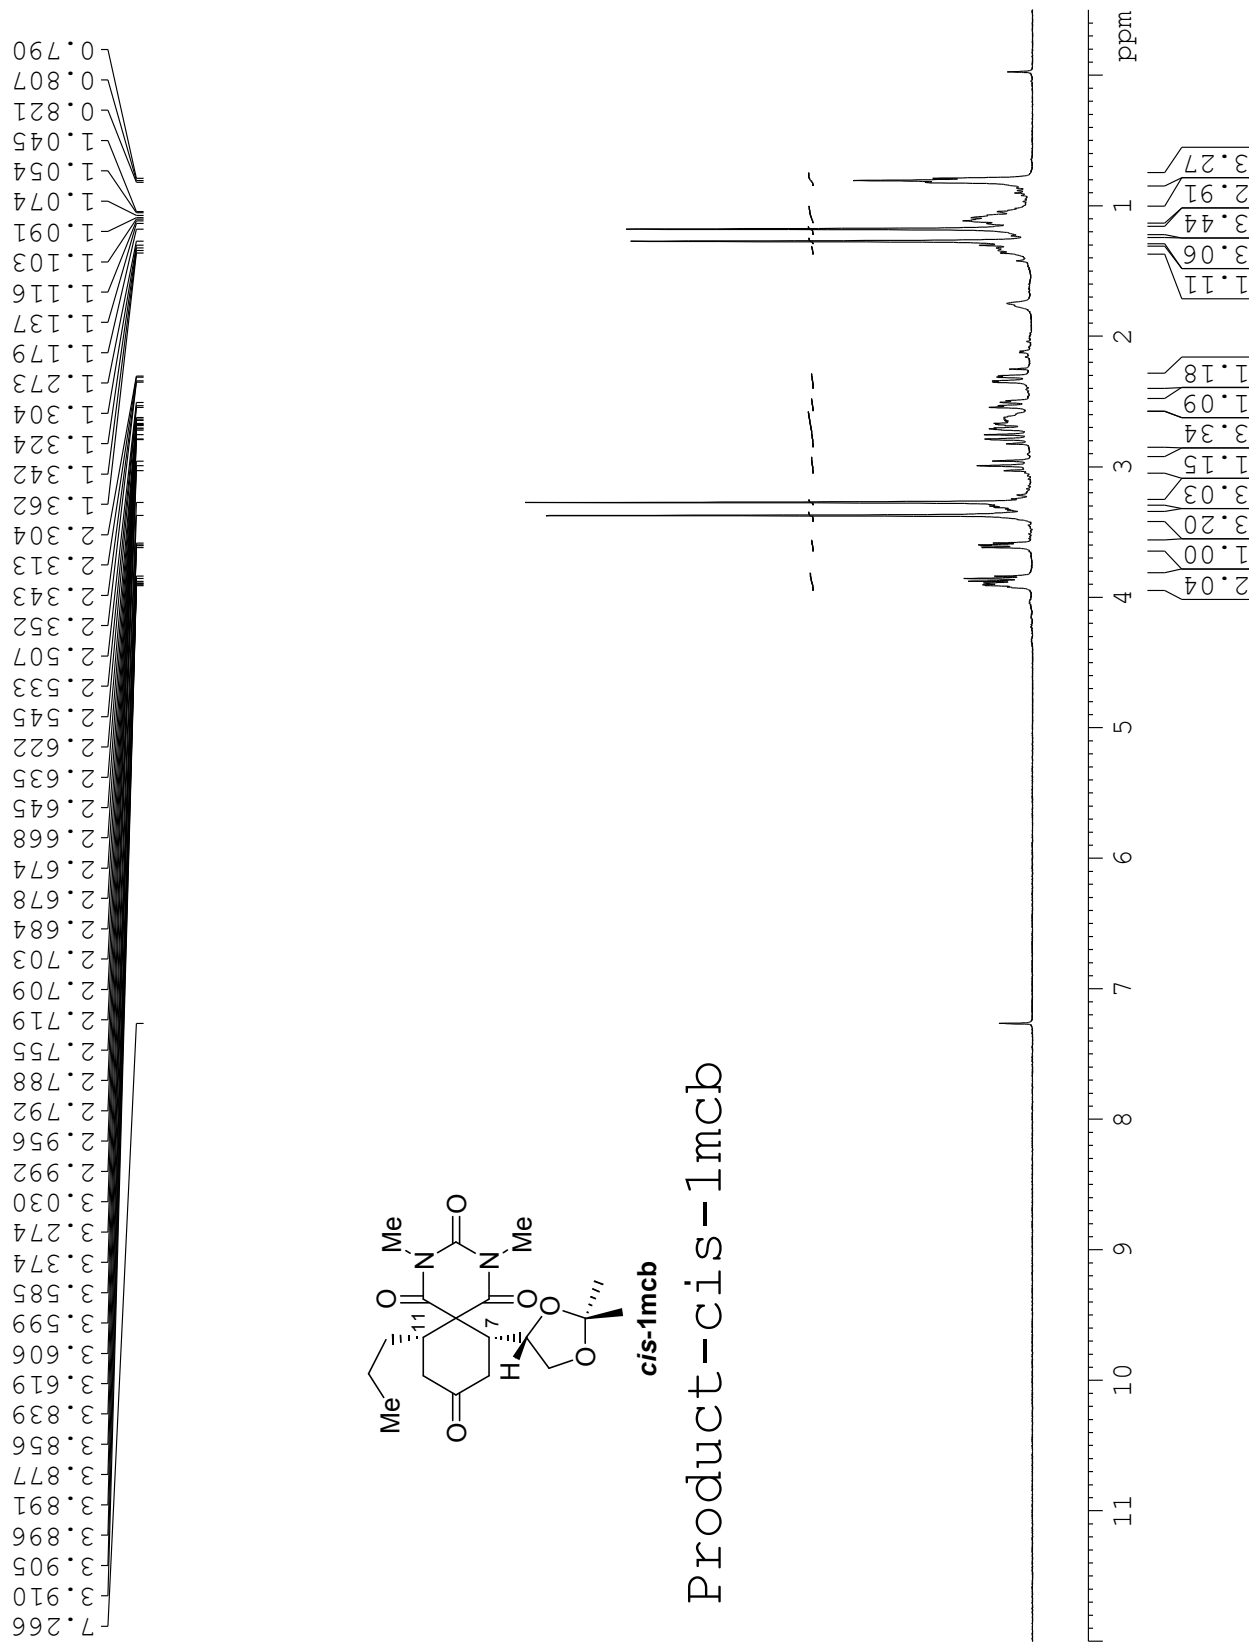



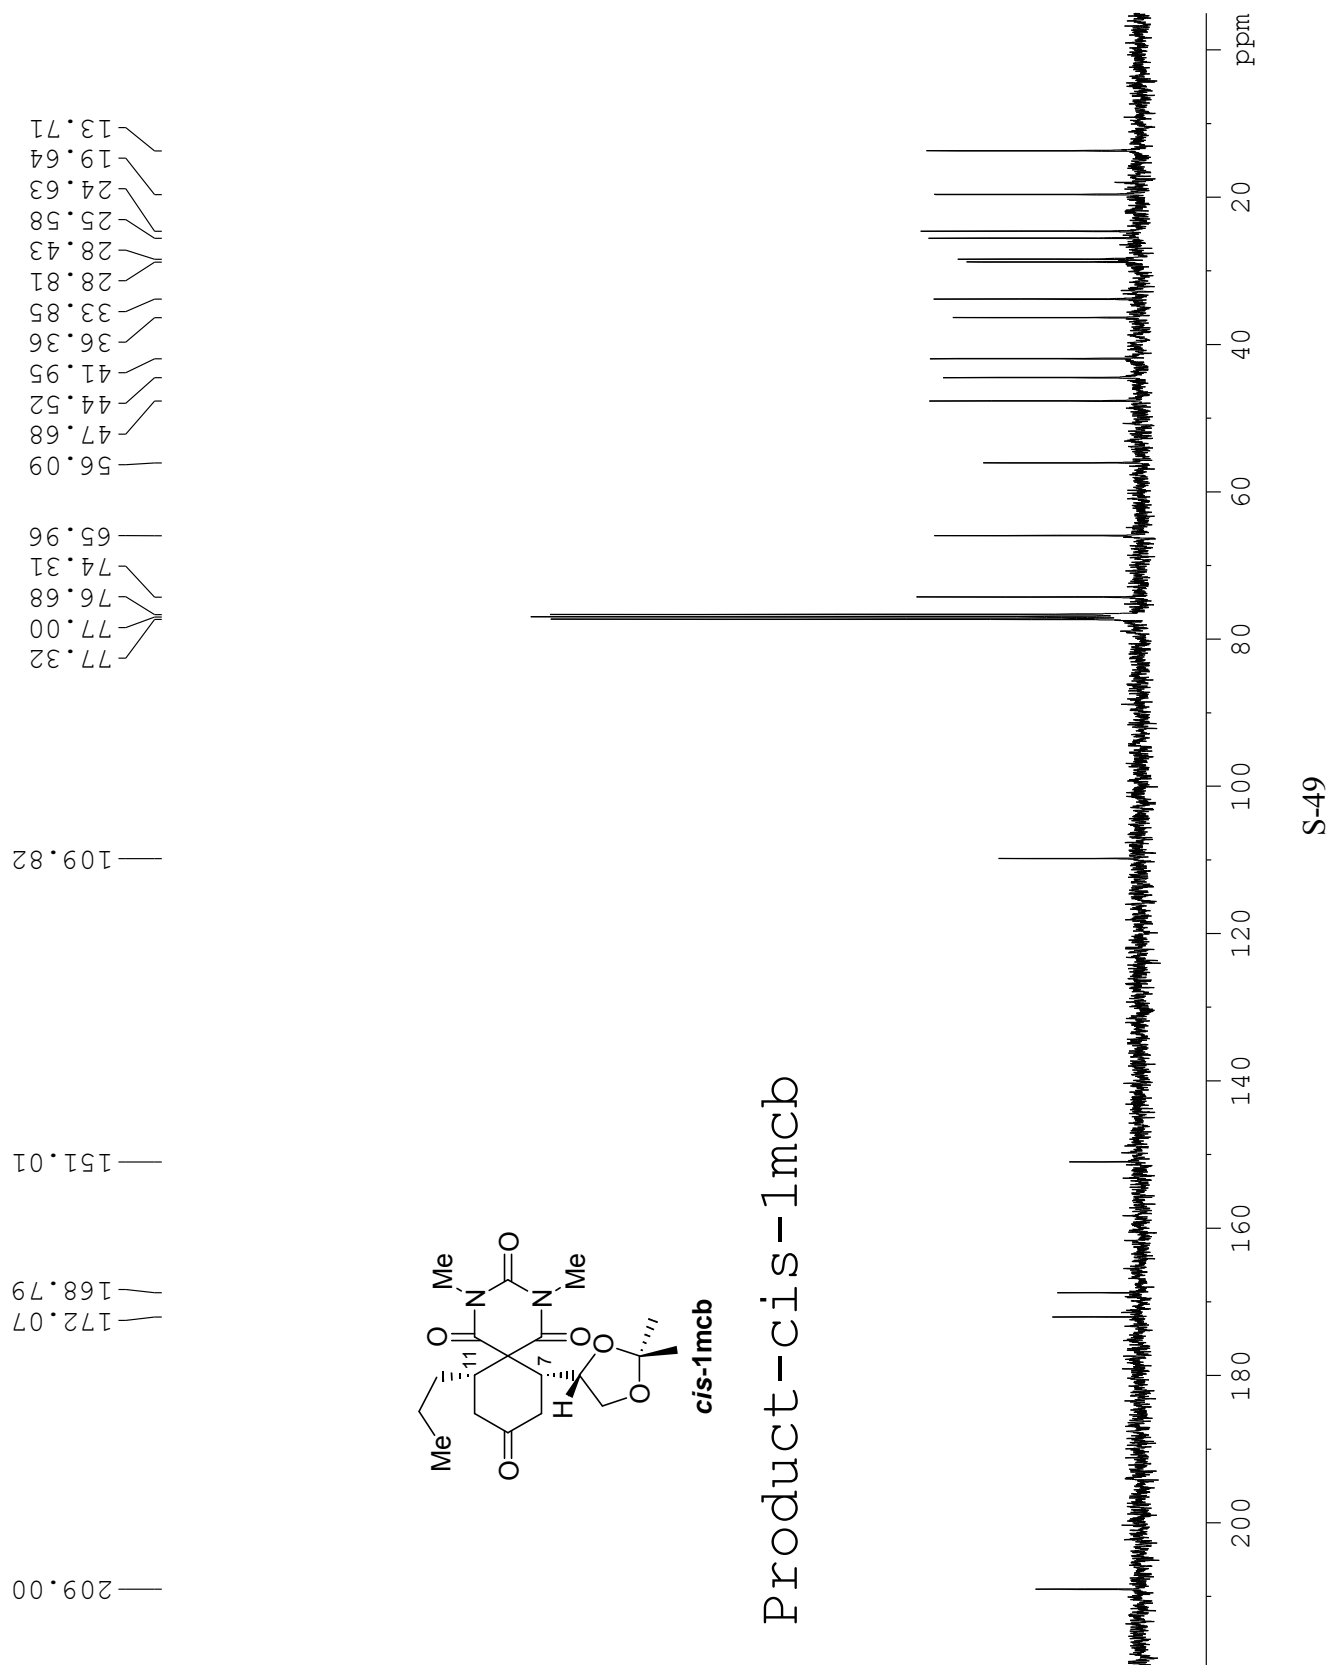

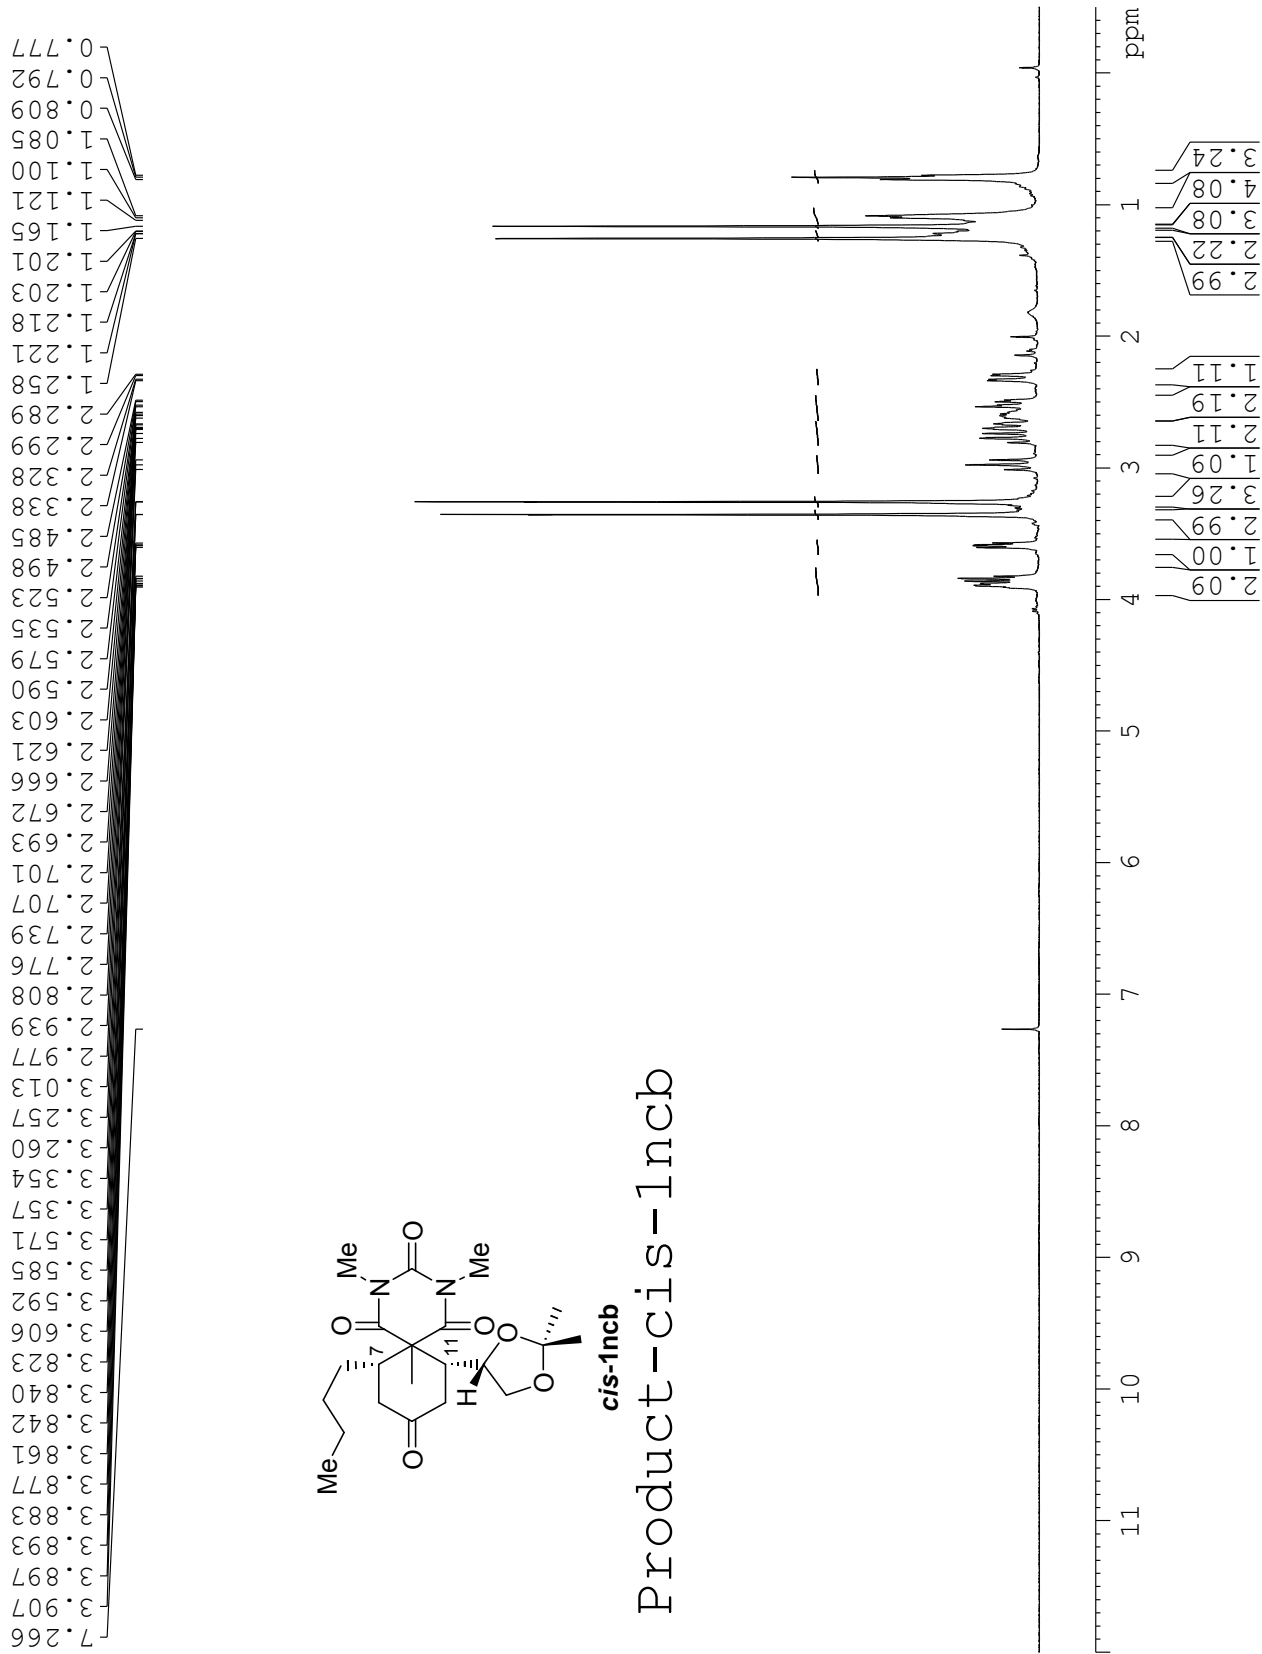

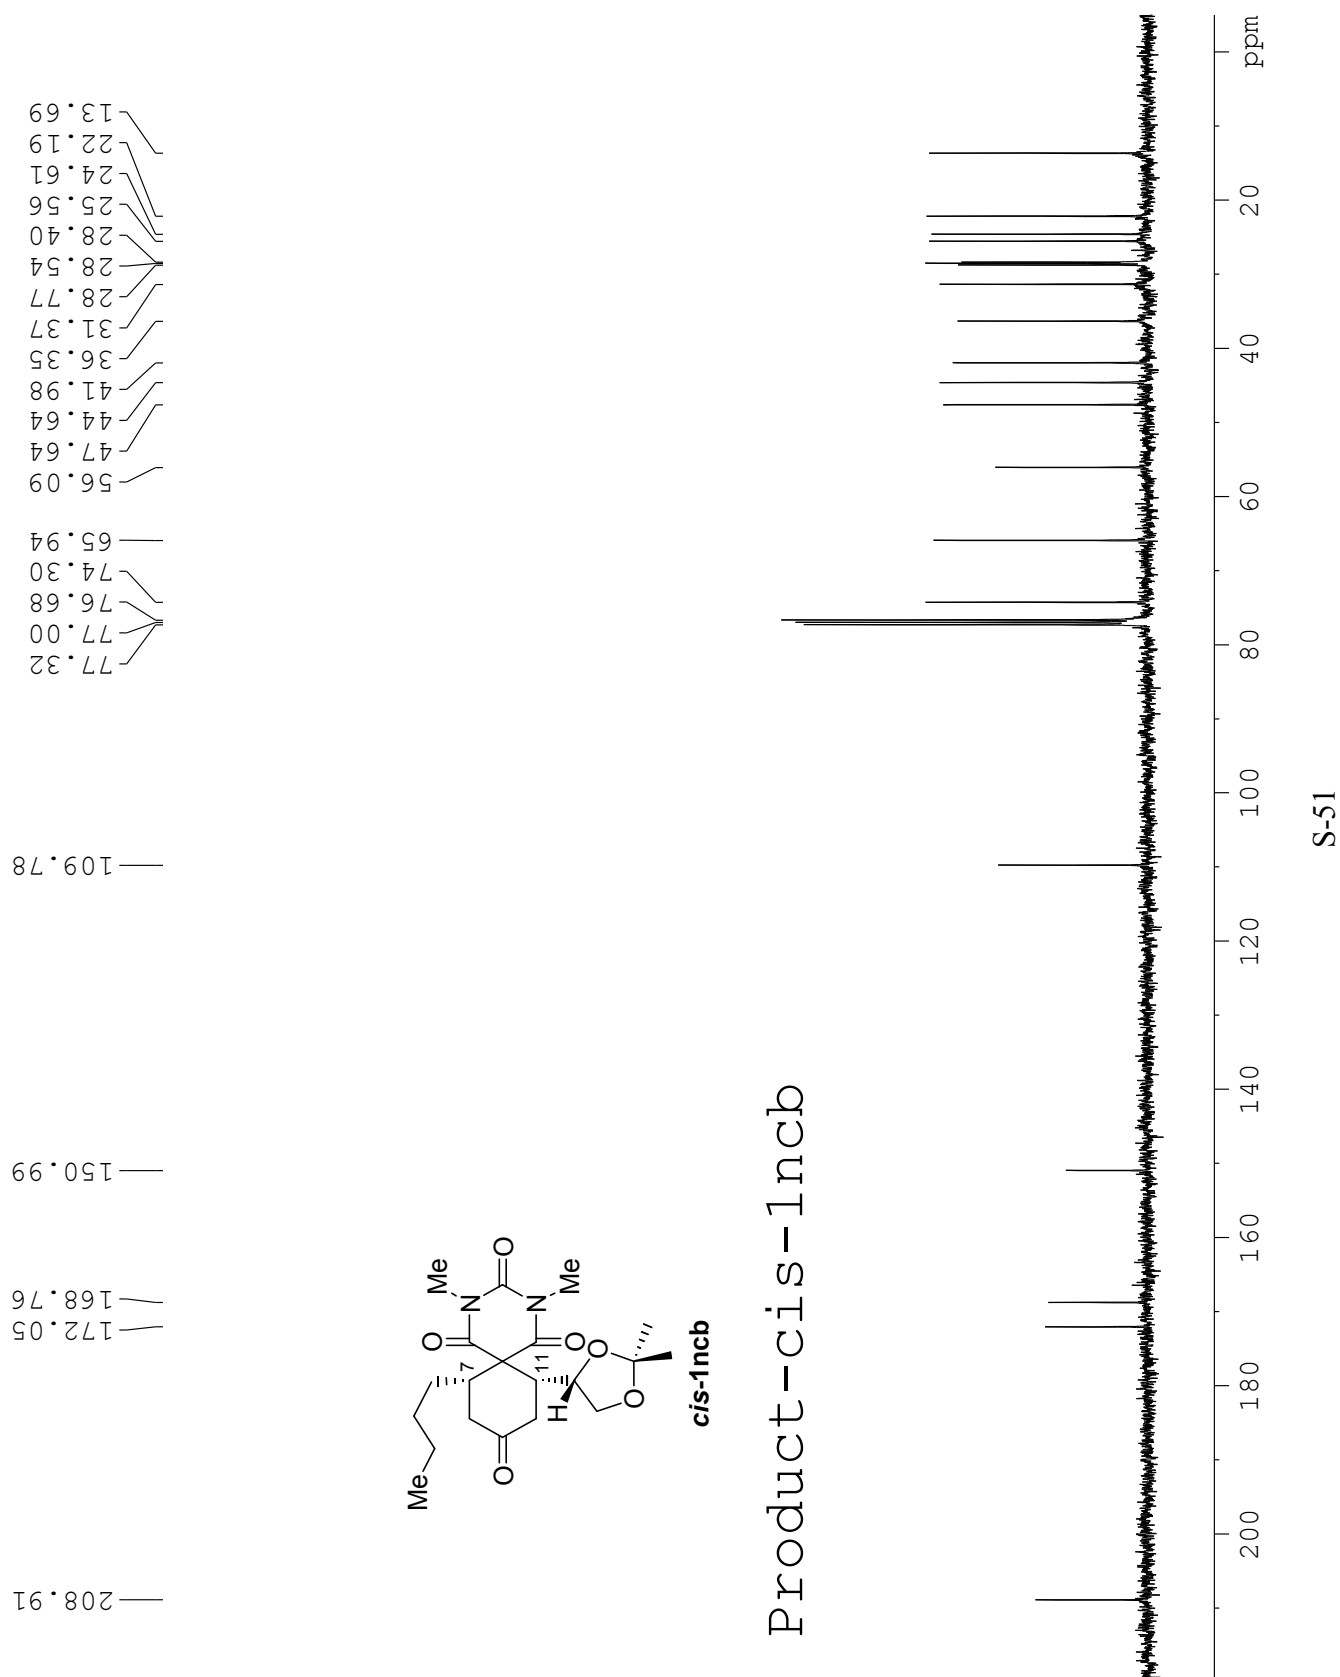

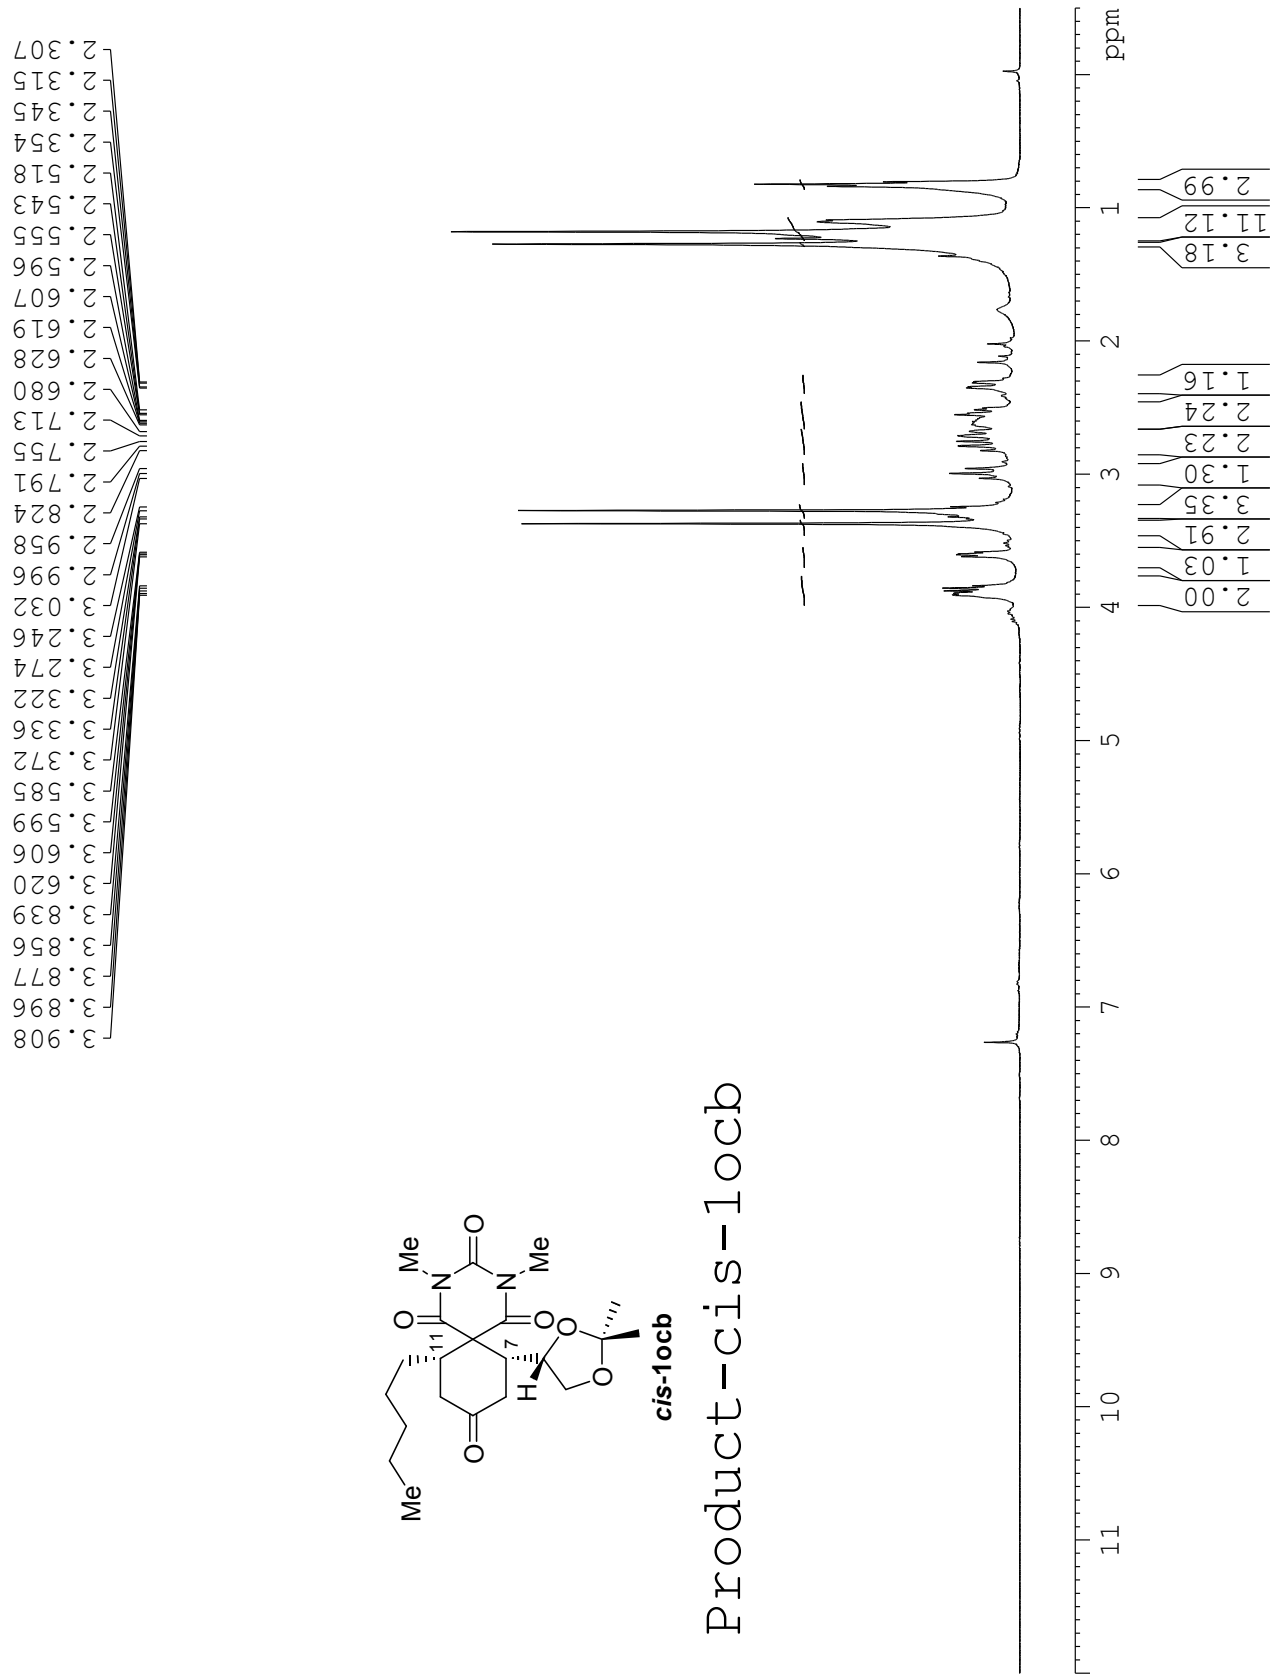

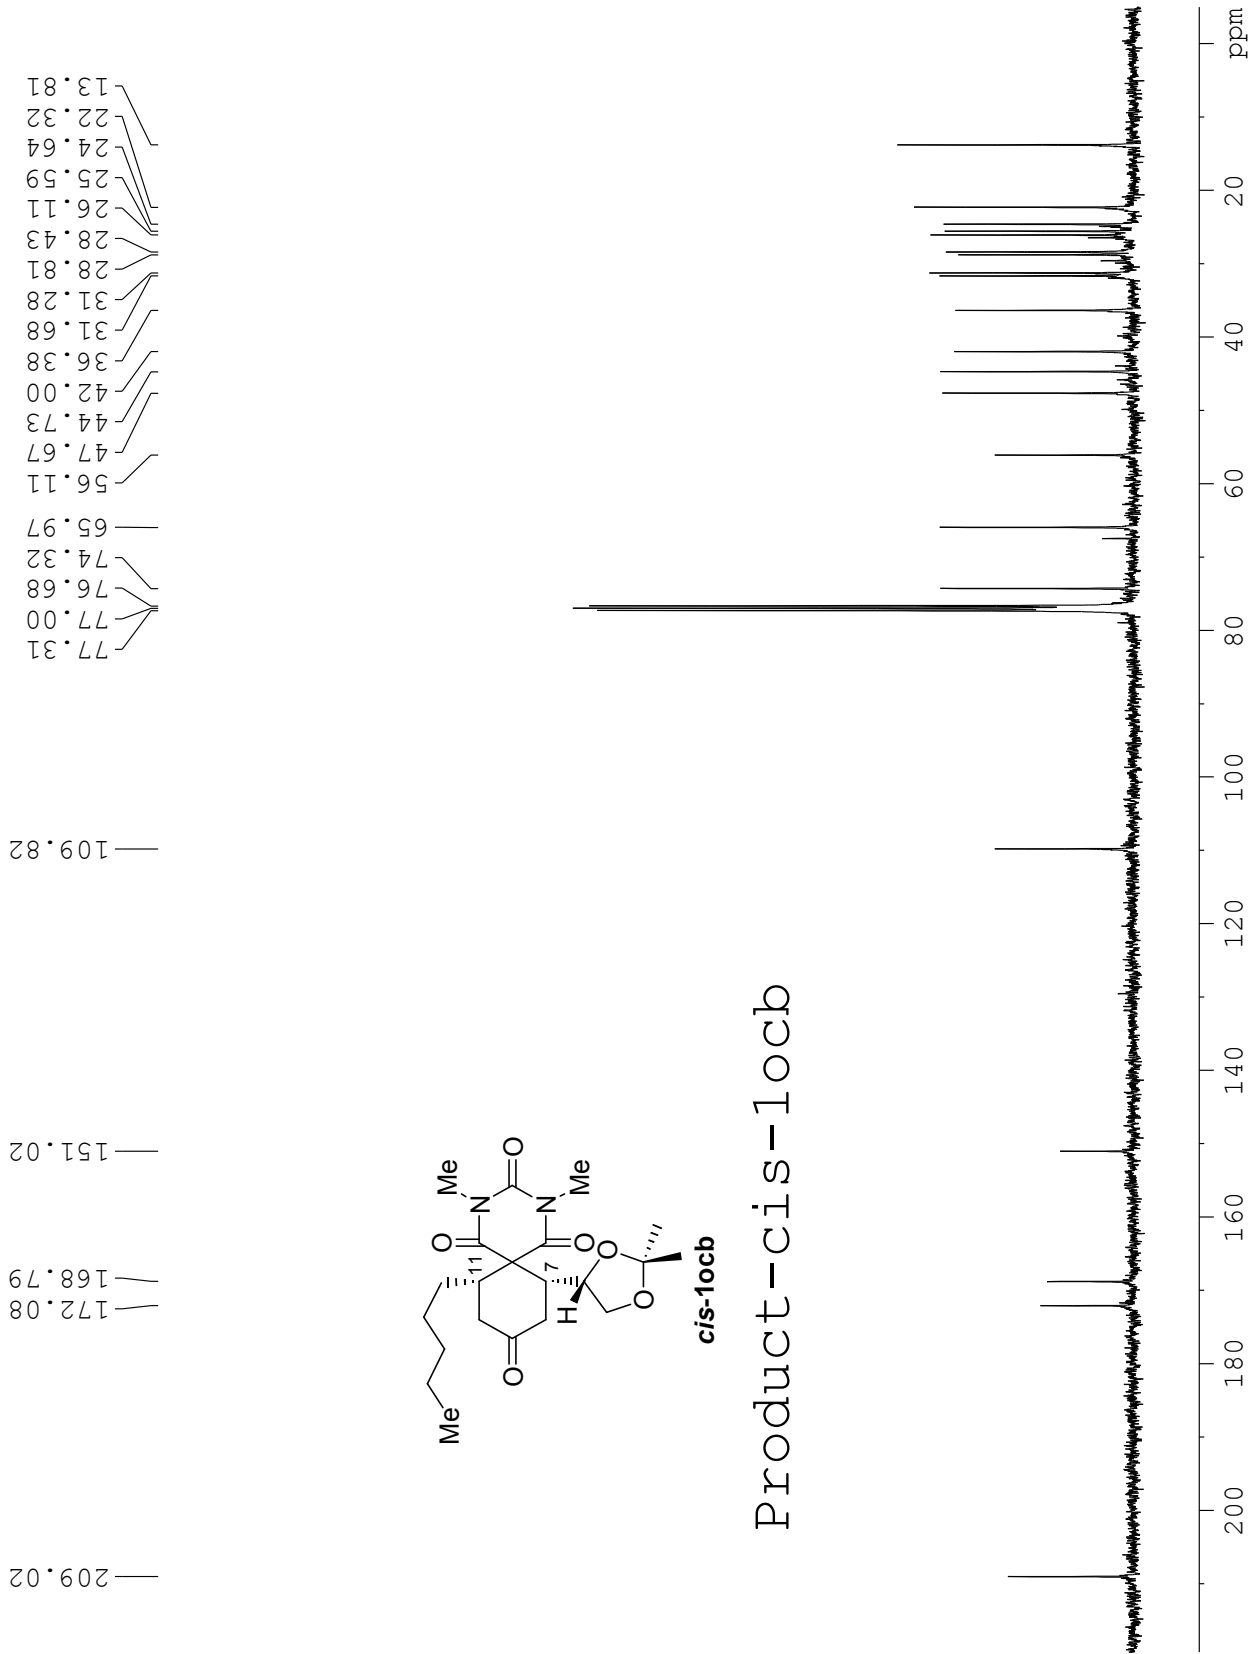

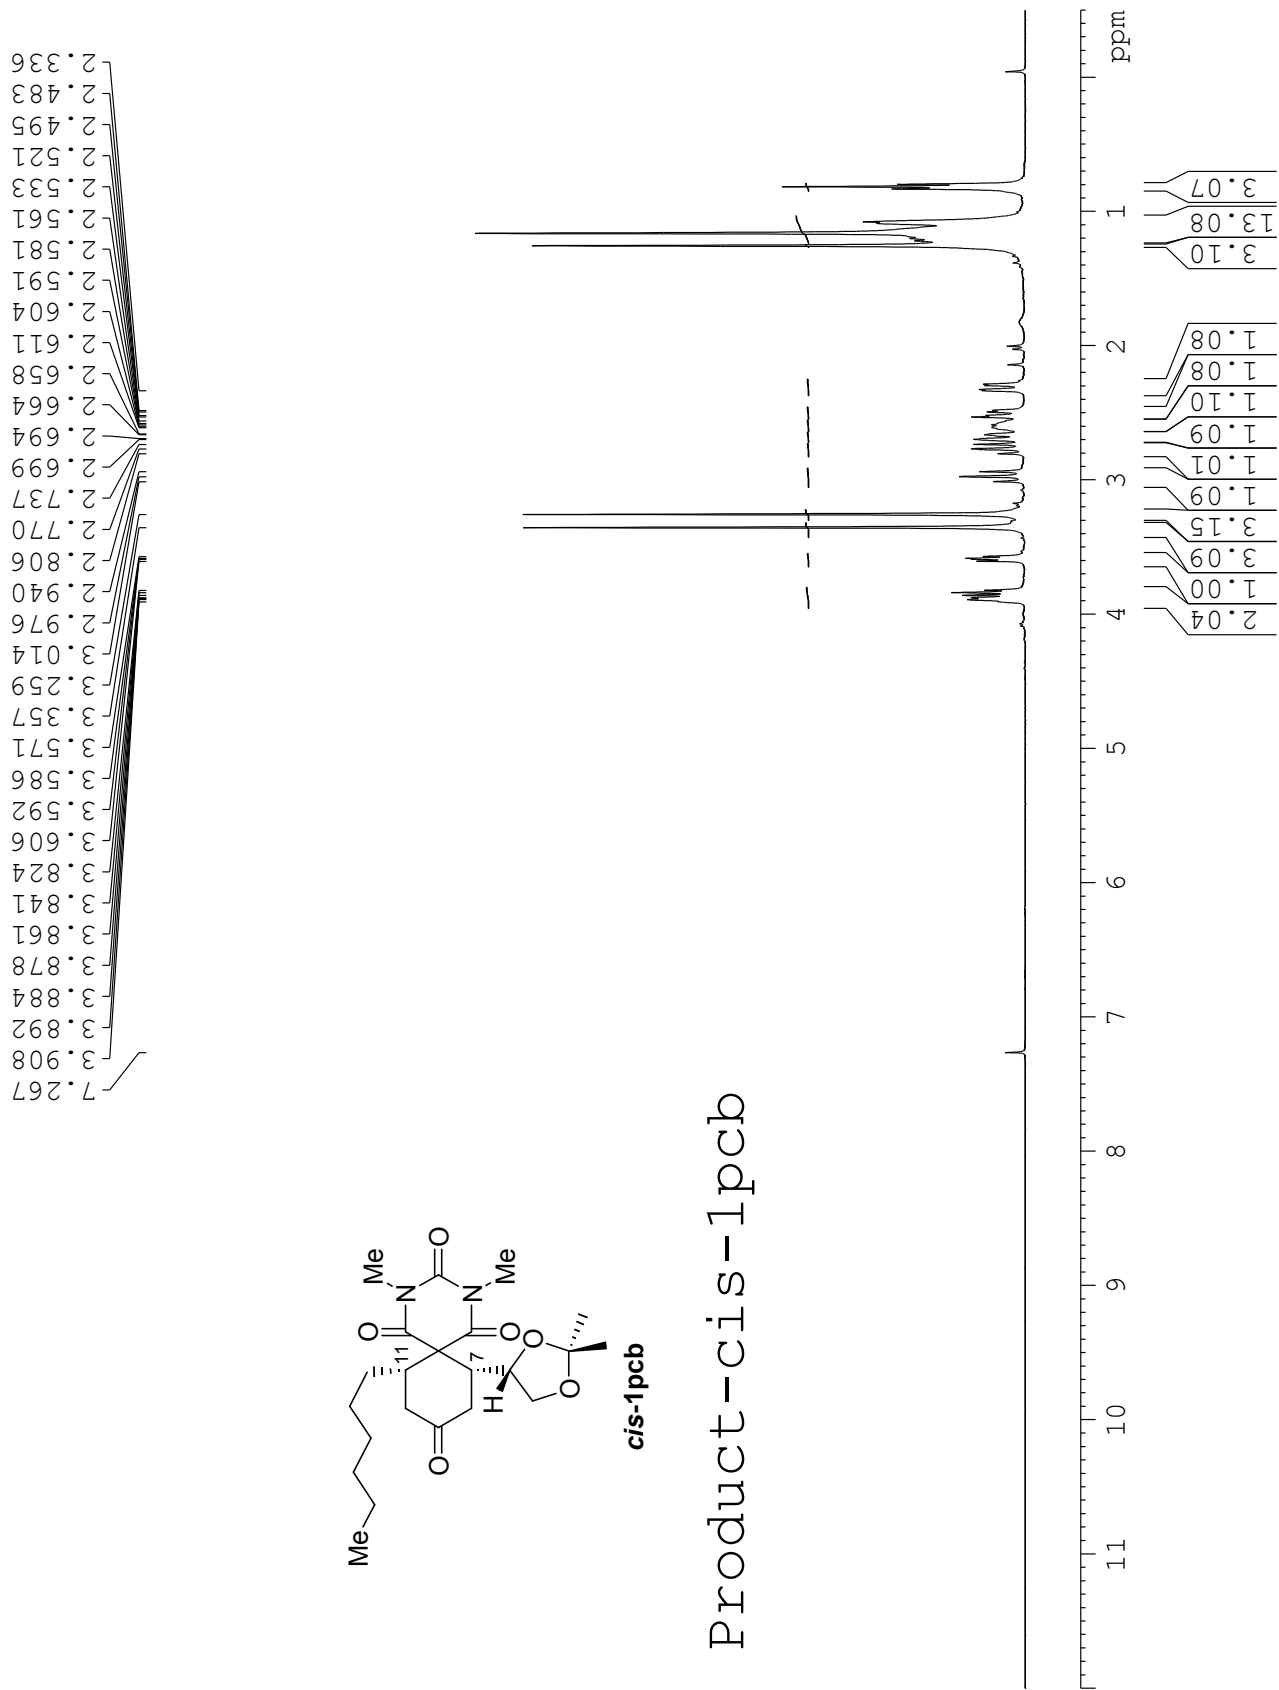

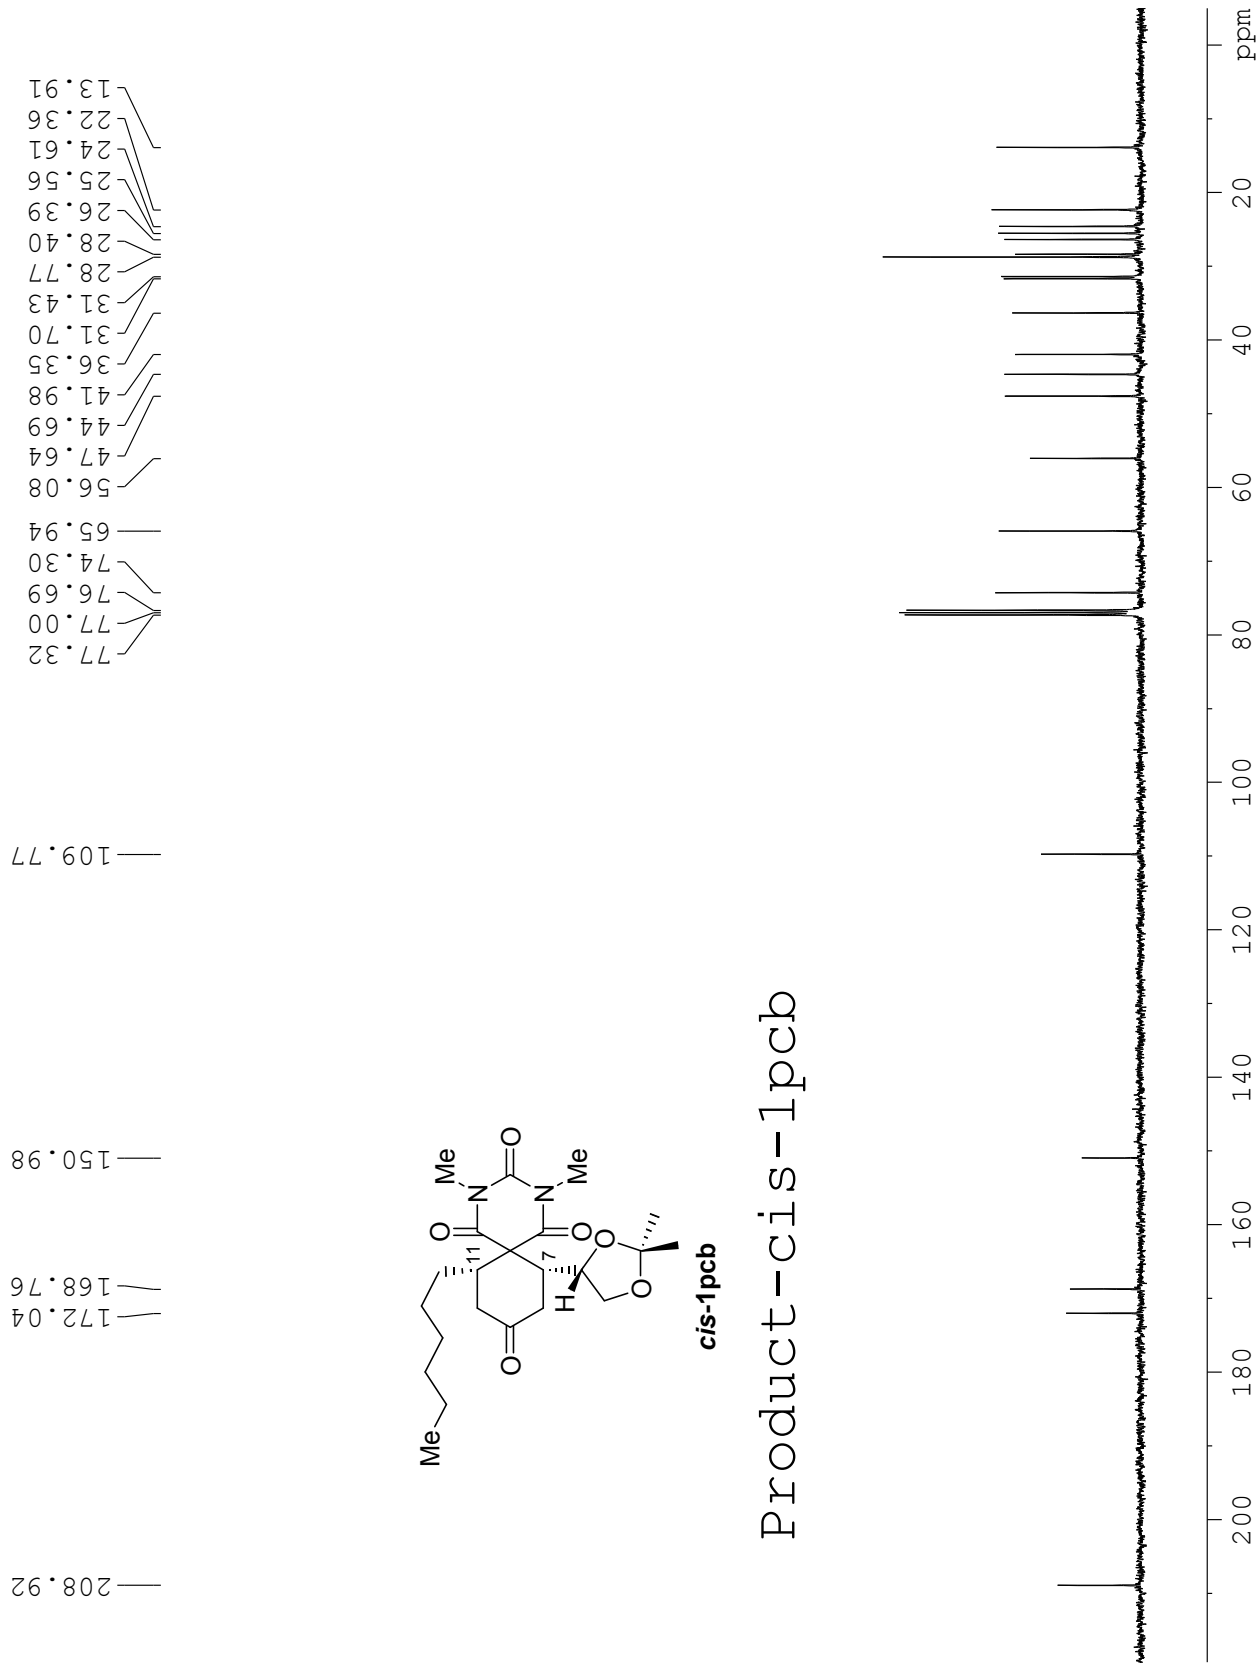

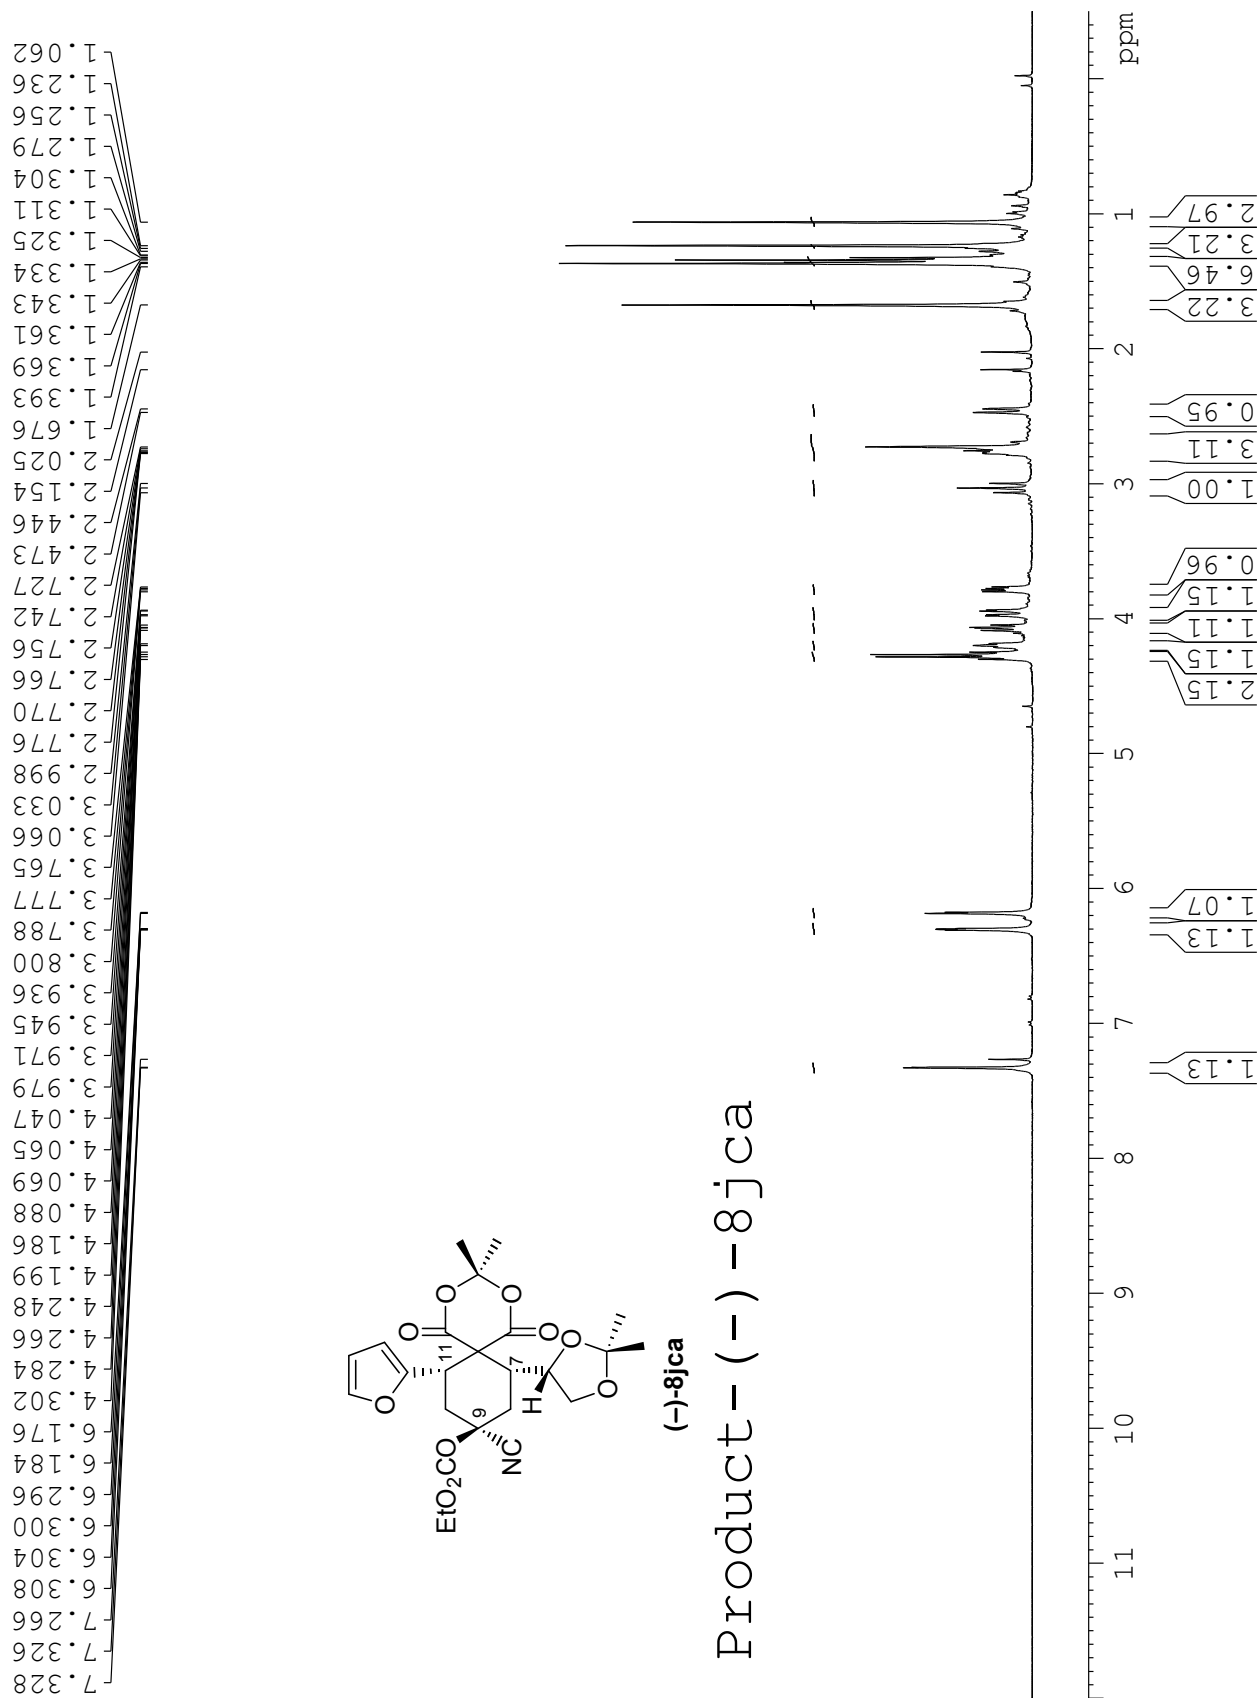



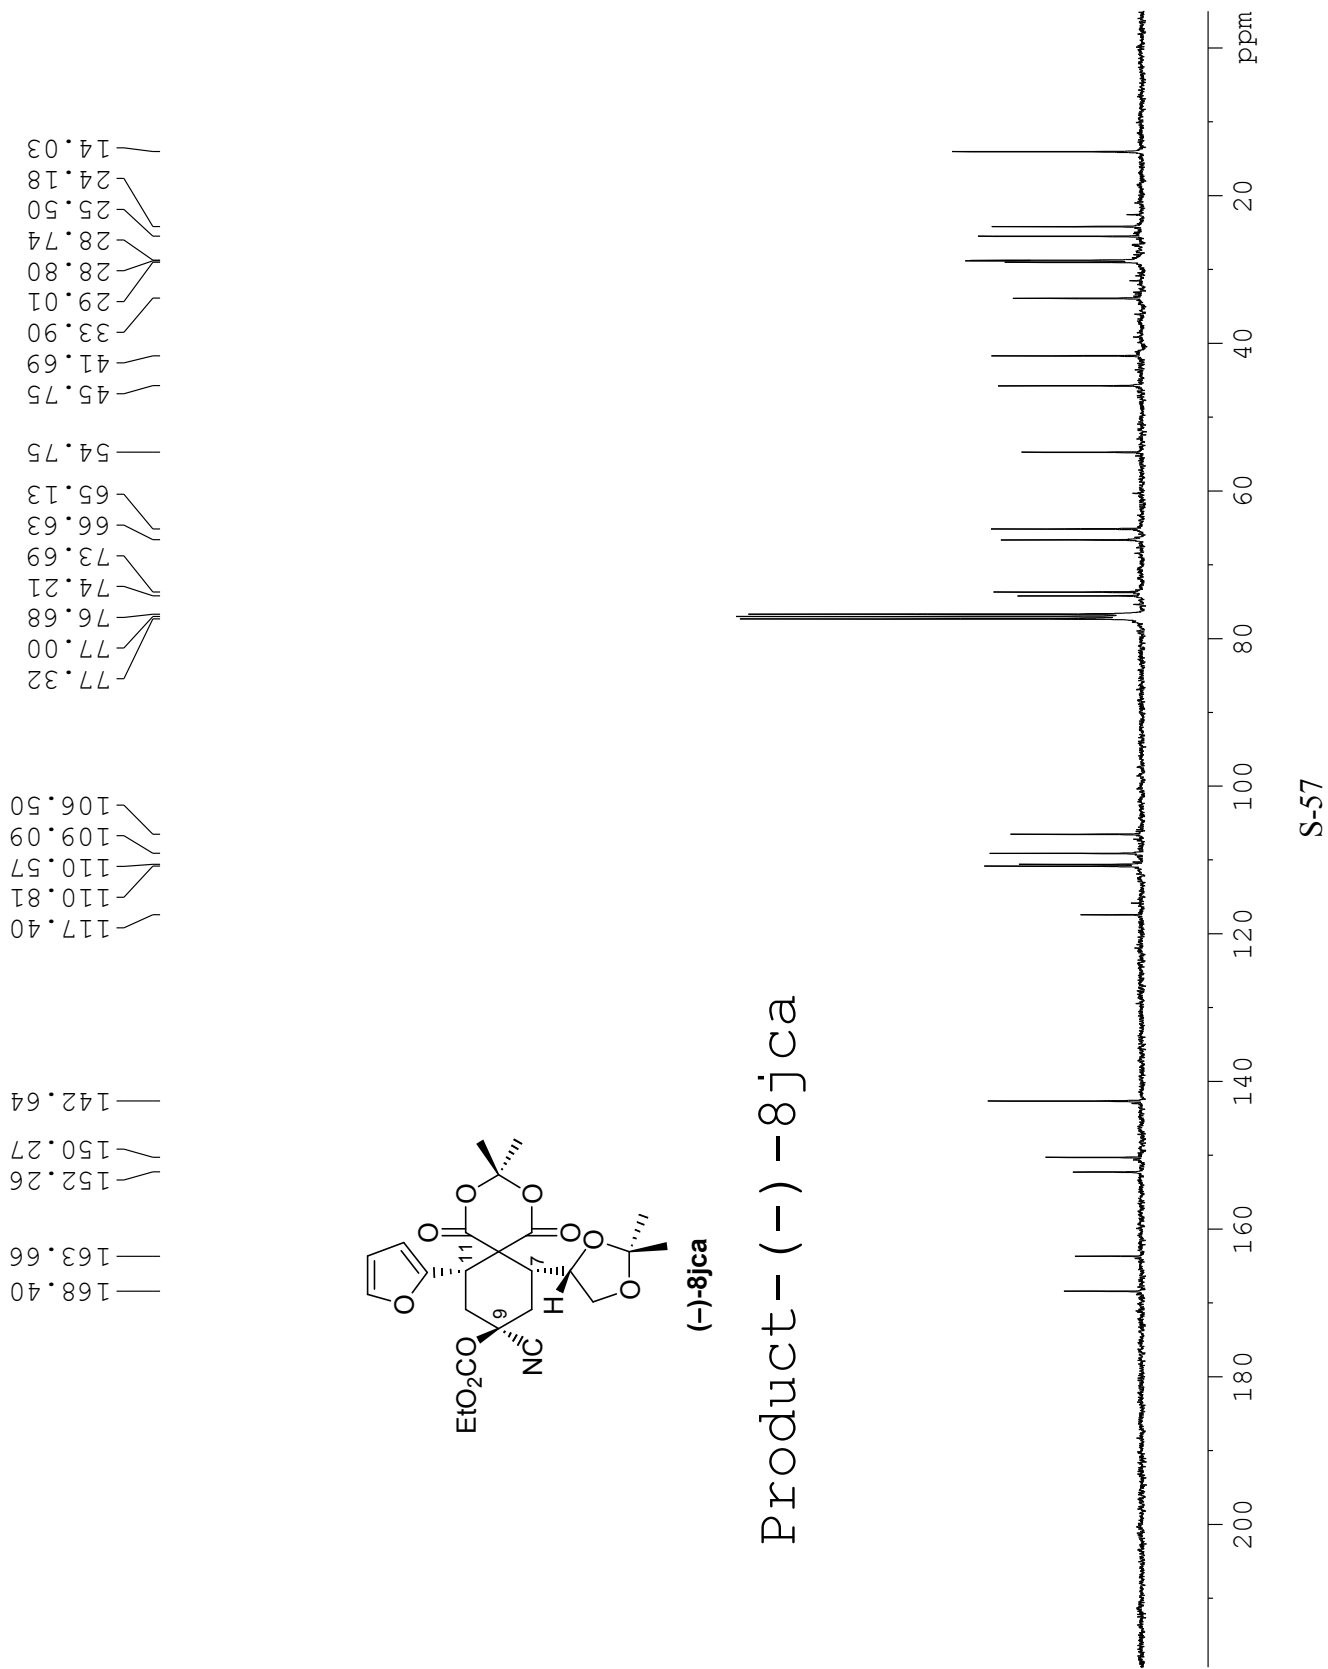

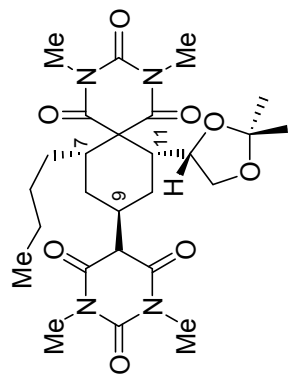

(-)-9ncb

Product - (-) - 9ncb

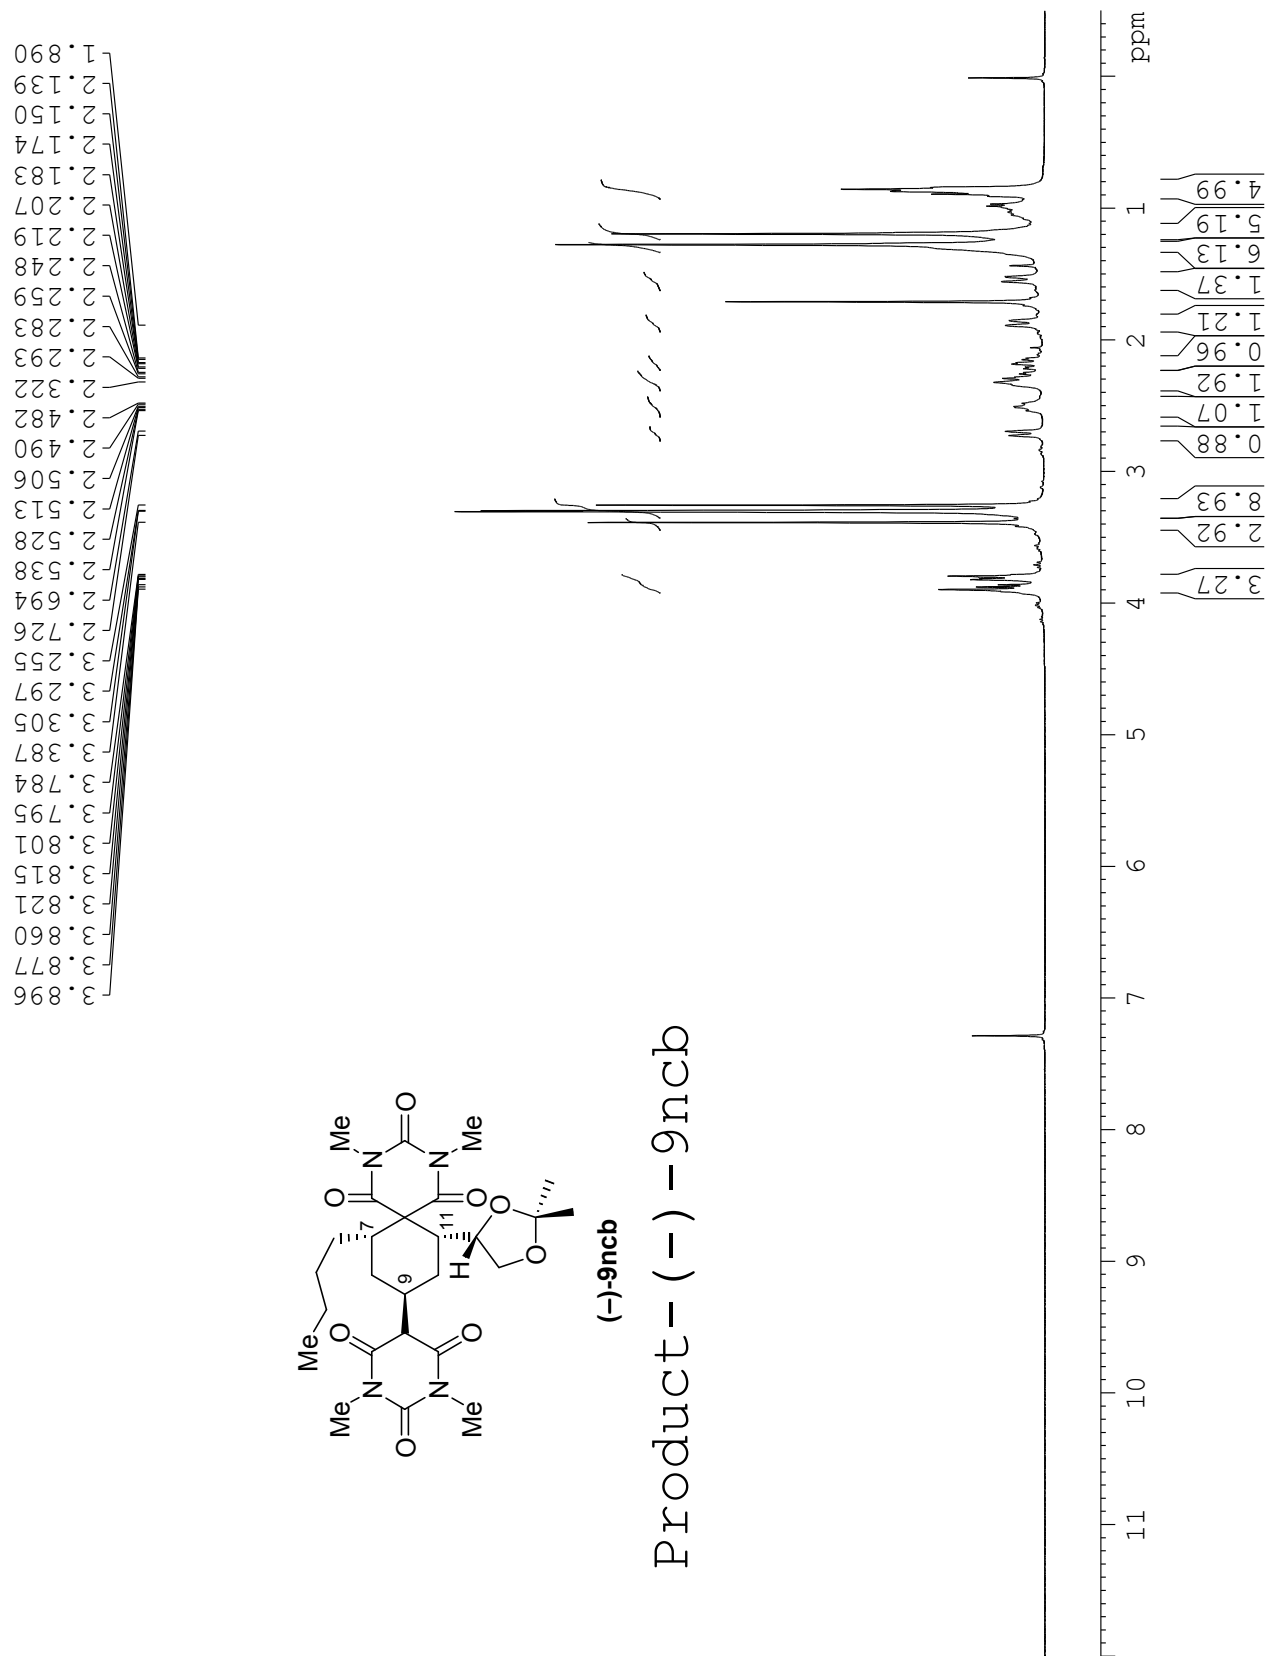

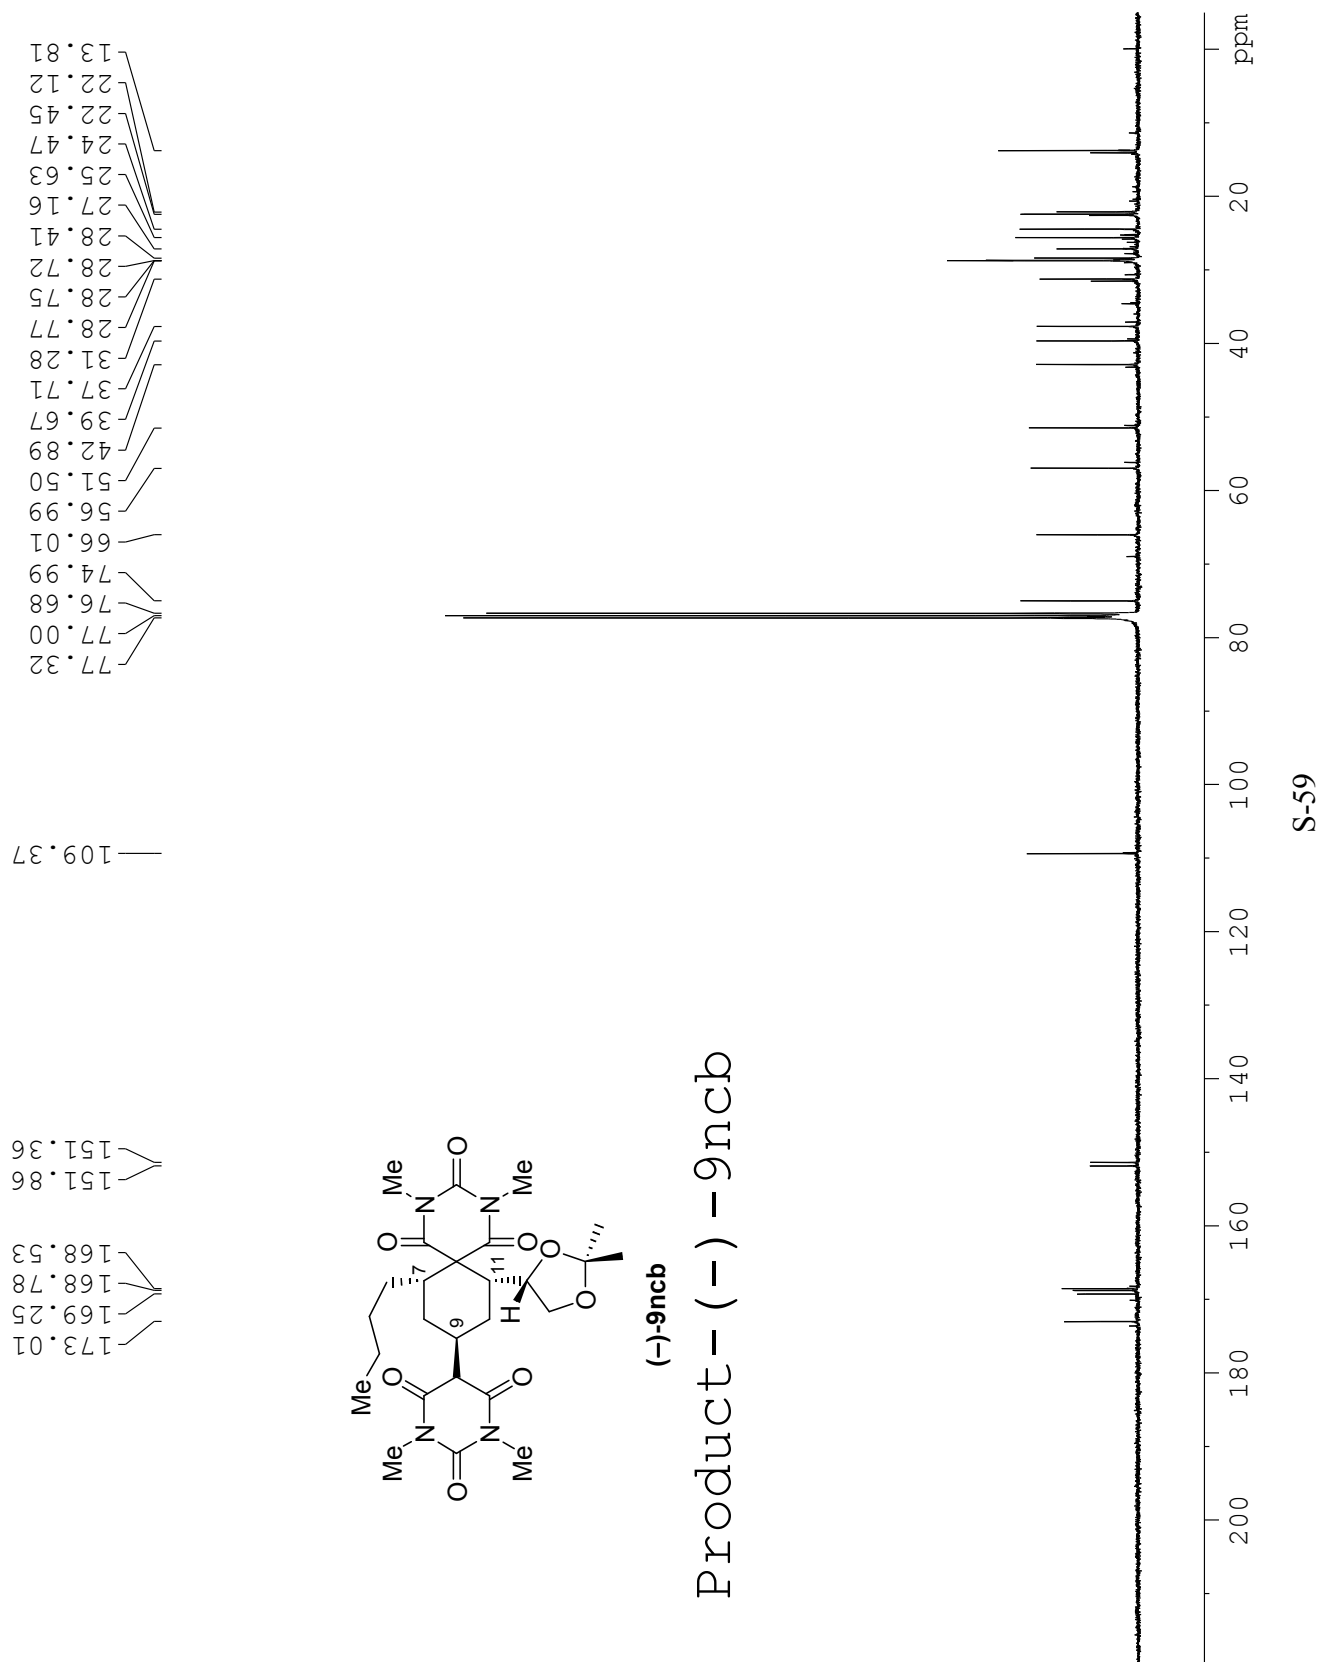

Supplement: c1ob06133j_2.pdf [file c1ob06133j_2.pdf]
